# Supplementary material for: Evolutionary routes to biochemical innovation revealed by integrative analysis of a plant-defense related specialized metabolic pathway
Source: eLife. 2017 Aug 30;6:e28468. doi: 10.7554/eLife.28468 (PMC5595436; doi:10.7554/eLife.28468)
Supplement: Figure 1—source data 1. — Tissues sampled are described. [file elife-28468-fig1-data1.xlsx]

## Sheet: MAIN
	Description of worksheets
	Figure 1-Source Data 1A	NYBGSpeciesInfo	Information and notes about species sampled at the New York Botanical Gardens. Sample numbers provided can be cross-referenced against the LC/MS sample runs, which can be made available upon request.
	Figure 1-Source Data 1B	TrichomeAnalysis	Presence/absence of trichomes based on high-resolution photographs taken at the NYBG. Source data used for this interpretation will be made available on Dryad.

## Sheet: 1A-NYBGSpeciesInfo
Species	Developmental stage	Comments	Sample ID	Acylsugars?
Brunfelsia nitida	young leaf		A12658	N
Brunfelsia nitida	young leaf		A12659	N
Juanulloa mexicana	very young leaf		A12660	N
Juanulloa mexicana	very young leaf		A12661	N
Juanulloa mexicana	very young leaf		A12662	N
Brunfelsia pilosa	very young leaf	older leaves hairy on midrib	A12663	N
Brunfelsia pilosa	calyx		A12664	N
Iochroma fuchsioides	meristem		A12665	N
Iochroma fuchsioides	petiole		A12666	N
Solandra sp.	petiole+midrib	highly glabrous/rubbery2. hairs not sure if fungus/trichome.	A12667	N
Solanum betaceum peru	meristem	trichomes on the edge of leaf	A12668	N
Solanum betaceum peru	young leaf lamina		A12669	N
Solanum betaceum bolivia	meristem		A12670	N
Solanum betaceum peru	fruit stem	lots of trichomes on fruit stem	A12671	N
Iochroma cyanea	new emerging leaf	huge # of trichomes on all parts. flies seem to be dying on leaves. bad bad sweaty smell.	A12672	Y
Iochroma cyanea	peduncle		A12673	Y
Iochroma cyanea	unopened flower 1cm		A12688	Y
Iochroma cyanea	petiole		A12689	Y
Ipomoea batatas margarita	unopened young leaf		A12690	N (carry-over from Iochroma)
Ipomoea batatas margarita	open leaf		A12691	N (carry-over from Iochroma)
Capsicum chinense	young leaf	few hairs on leaf petioles	A12692	N (carry-over from Iochroma)
Capsicum annuum	young leaf	no visible trichomes	A12693	N (carry-over from Iochroma)
Capsicum annuum	fruit	for seed		N (carry-over from Iochroma)
Capsicum annuum	young leaf	no visible trichomes	A12694	N (carry-over from Iochroma)
Capsicum annuum	fruit	for seed		N (carry-over from Iochroma)
Solanum quitoense left plant	young purple leaf	lots of trichomes on fruit, stem, leaves	A12681	N (carry-over from Iochroma)
Solanum quitoense right plant	unopened flower calyx		A12682	N (carry-over from Iochroma)
Brugmansia suaveolens left plant	very young leaf	old tissues dont have trichomes	A12683	N
Brugmansia suaveolens right plant	unopened flower bud		A12684	N
Brugmansia suaveolens right plant	flower petal		A12685	N
Solanum brachyantherum	young, compound leaf		A12686	N
Lycianthes quichensis	young leaf	Has spider mites, trichomes on leaf, stem. No flower on plant.	A12687	N
Lycianthes quichensis	petiole		A12674	N
Atropa belladona	young leaf		A12675	Y
Mandragora autumnalis	leaf lamina		A12676	N
Physalis viscosa	young leaf		A12677	Y
Physalis viscosa	petiole		A12678	Y
Physalis viscosa	flower bud		A12679	Y
Solanum eutuberosum	young leaf		A12701	N
Solanum eutuberosum	petiole		A12700	N
Hyoscyamus niger	young leaf		A12699	Y
Hyoscyamus niger	calyx, green part of flower		A12698	Y
Hyoscyamus niger	stem		A12697	Y
Nicotiana sp.	young leaf		A12696	N (carry-over from Hyoscyamus)
Nicotiana sp.	petiole		A12695	N (carry-over from Hyoscyamus)
Withania somnifera	young leaf		A12708	N
Withania somnifera	petiole		A12707	N
Salpiglossis sinuata	young leaf	extremely sticky	A12706	Y
Salpiglossis sinuata	petiole		A12705	Y
Salpiglossis sinuata	fruit with calyx		A12704	Y
Salpiglossis sinuata	old leaf		A12703	Y
Atropa belladona	flower buds, only petals, no sepals		A12702	Y
Goetzia sp.	young leaf	glabrous leaves, tiny tiny hair on very young leaves	A12584	N (carry-over from Atropa)
Goetzia sp.	stem		A12612	N (carry-over from Atropa)
Iochroma fuchsioides	young leaf		A12614	N
Iochroma fuchsioides	petiole		A12607	N
Cestrum diurnum	young leaf	leaf like slightly rough paper	A12600	N
Cestrum diurnum	fruit		A12593	N
Cestrum diurnum	opened flower		A12586	N
Cestrum diurnum	petiole		A12579	N
Datura inoxia	young leaf		A12572	N
Datura inoxia	petiole		A12613	N
Solanum aethiopicum	old leaf		A12606	N
Solanum aethiopicum	petiole		A12599	N
Withania somnifera, garden	young leaf		A12592	N
Withania somnifera, garden	petiole		A12585	N
Withania somnifera, garden	flower bud		A12578	N
Physalis alkekengi	old old leaf	orange calyx, fruit inside	A12571	Y
Physalis alkekengi	petiole		A12605	Y
Physalis alkekengi	orange calyx		A12598	Y
Lycianthes rantonnetii	leaf		A12591	N (carry-over from Physalis)
Lycianthes rantonnetii	petiole		A12577	N (carry-over from Physalis)
Lycianthes rantonnetii	opened flower		A12576	N (carry-over from Physalis)
Saracha aff. punctata	young leaf		A12583	N (carry-over from Physalis)
Saracha aff. punctata	petiole		A12590	N (carry-over from Physalis)
Saracha aff. punctata	stem		A12597	N (carry-over from Physalis)
Solanum jasminoides	leaf		A12604	N
Solanum jasminoides	petiole		A12611	N
Solanum jasminoides	opened flower		A12855	N
Solanum conocarpum	old leaf, near midrib		A12743	N
Solanum conocarpum	petiole		A12750	N
Solanum conocarpum	stem		A12757	N
Solanum nigrum	young leaf		A12764	Y
Solanum nigrum	fruit		A12771	Y
Solanum nigrum	stem		A12778	Y
Nicotiana alata yellow	leaf		A12785	Y
Nicotiana alata yellow	flower bud		A12792	Y
Nicotiana alata yellow	stem		A12799	Y
Nicotiana alata white	leaf		A12806	Y
Nicotiana alata white	flower bud		A12813	Y
Nicotiana alata white	stem		A12820	Y
Calibrochoa sp.	leaf		A12827	N (carry-over from Nicotiana alata)
Calibrochoa sp.	stem		A12834	N (carry-over from Nicotiana alata)
Nicotiana sylvestris	leaf		A12841	N (carry-over from Nicotiana alata)
Solanum pseudocapsicum	young leaf		A12848	N
Solanum pseudocapsicum	stem		A12742	N
Solanum pseudocapsicum	opened flower		A12749	N
Solanum spirale	leaf		A12756	N
Solanum spirale	stem		A12763	N
Physalis peruviana	leaf		A12770	N
Physalis peruviana	petiole		A12777	N
Physalis peruviana	flower		A12784	N

## Sheet: 1B-TrichomeAnalyses
Species	Acylsugars	Trichomes	Glandular trichomes		Key
Solanum lycopersicum M82	1	1	3		0: No trichomes
Solanum betaceum	0	1	1		1: Maybe, or trichome density too low
Solanum quitoense	1	1	3		2: Maybe, and glandular
Solanum eutuberosum	0	1	1		3: Yes, glandular trichomes present
Solanum brachyantherum	0	1	2
Solanum aethiopicum	0	1	1		These trichome states were interpreted based on high-res photographs taken at the NYBG
Solanum jasminoides	0	0	0
Solanum conocarpum	0	1	1		Considering only 3
Solanum nigrum	1	1	1			With glandular trichomes	Without glandular trichomes
Solanum pseudocapsicum	0	0	0		With Acylsugars	11	2
Capsicum chinense	0	1	0		Without acylsugars	2	25
Capsicum annuum	0					p=2.3e-6
Lycianthes quichensis	0	1	1
Lycianthes rantonnetii	0	0	0
Physalis alkekengii	1	1	2
Physalis peruviana	1	1	3		Considering both 2 and 3
Physalis viscosa	1	1	3			With glandular trichomes	Without glandular trichomes
Iochroma cyaneum	1	1	3		With Acylsugars	12	2
Iochroma fuchsioides	0	1	0		Without acylsugars	4	25
Saracha aff. punctata	0	1	0			p=8.3e-6
Withania somnifera	0	1	3
Brugmansia suaveolens	0	1	2
Datura inoxia	0	0	0		Trichomes only
Mandragora autumnalis	0	0	0			With trichomes	Without trichomes
Juanulloa mexicana	0	1	1		With Acylsugars	13	1
Solandra sp.	0	1	1		Without acylsugars	17	12
Atropa belladona	1	1	3			p=0.03
Hysocyamus niger	1	1	3
Nicotiana sp.	1	1	3
Nicotiana alata yellow	1	1	3
Nicotiana alata white	1	1	3
Nicotiana sylvestris	1
Brunfelsia nitida	0	0	0
Calibrachoa sp.	0	1	0
Salpiglossis sinuata	1	1	3
Cestrum diurnum	0
Goetzia sp.	0	0	0
Schizanthus wisetonsis	0	1	3
Ipomoea purpurea	0	0	0
Argyreia nervosa	0	0	0
Convolvulus cneorum	0	1	0
Dichondra silver falls	0	1	0
Ipomoea batatas "margarita"	0	0	0
