# Supplementary material for: Evolutionary routes to biochemical innovation revealed by integrative analysis of a plant-defense related specialized metabolic pathway
Source: eLife. 2017 Aug 30;6:e28468. doi: 10.7554/eLife.28468 (PMC5595436; doi:10.7554/eLife.28468)
Supplement: Figure 1—source data 2. — Values indicate normalized peak areas where Normalized peak area = [(Acylsugar peak area)/(Area of internal standard)]/Dry weight of tissue. [file elife-28468-fig1-data2.xlsx]

## Sheet: MAIN
	Figure1-Source Data 2	Values used to generate the figures in Figure 1C-E and Figure Supplement 2. Values indicate normalized peak areas where Normalized peak area = [(Acylsugar peak area)/(Area of internal standard)]/Dry weight of tissue

## Sheet: Squitoense
Species	Compound	RT	Normalized
			Leaf	Petiole	Stem
Solanum quitoense	UA-1	8.44	0.286514	0.00136659	5.27276
Solanum quitoense	UA-2	9.81	9.88249	12.8623	6.78035
Solanum quitoense	UA-3	10.14	11.4199	13.1294	9.60897
Solanum quitoense	UA-4	10.89	3.59903	5.22815	2.9423
Solanum quitoense	UA-5	11.47	3.26451	3.64842	1.04106
Solanum quitoense	UA-6	11.88	5.30986	4.5296	2.15644
Solanum quitoense	UA-7	12.56	2.70969	1.87812	8.84597
Solanum quitoense	UA-8	12.74	19.3214	17.8147	17.6579
Solanum quitoense	UA-9	13.72	3.56508	0.583128	14.6805
Solanum quitoense	UA-10	13.87	27.6616	31.1588	23.9291
Solanum quitoense	UA-11	14.3	9.23749	5.9382	4.97737
Solanum quitoense	UA-12	15.1	3.74248	3.22773	2.10738
UA=Unidentified acylsugar

## Sheet: Pviscosa
	#Species	Sugar	NCarbons	Nchains	Petiole	Old leaf	Calyx			#Species	Sugar	NCarbons	Nchains	Petiole	Young leaf	Flower bud
	Physalis alkekengi	S2:12(4,8)	12	2	0.2	0	0.2			Physalis viscosa	S3:18(4,4,10)	18	3	1	0.3	0.3
	Physalis alkekengi	S2:12(6,6)	12	2	0	0	0.1			Physalis viscosa	S3:19(4,5,10)	19	3	1	0.4	0.4
	Physalis alkekengi	S2:13(5,8)	13	2	0.2	0.2	1.2			Physalis viscosa	S4:20(4,4,4,8)	20	4	0.9	0.5	1.5
	Physalis alkekengi	S2:14(6,8)	14	2	1.3	1.2	3.8			Physalis viscosa	S4:21(4,4,5,8)	21	4	4.7	3.5	5.4
	Physalis alkekengi	S2:16(8,8)	16	2	0.4	0.3	3			Physalis viscosa	S4:21(4,4,4,9)	21	4	0.9	0.5	1.8
	Physalis alkekengi	S3:16(5,5,6)	16	3	0.2	0.3	1.8			Physalis viscosa	S4:21(3,4,4,10)	21	4	0.6	0.2	0.2
	Physalis alkekengi	S3:17(4,5,8)	17	3	0.1	0.5	1.6			Physalis viscosa	S4:22(4,4,5,9)	22	4	5.4	4.7	8.2
	Physalis alkekengi	S3:17(5,6,6)	17	3	0.4	0.1	3.3			Physalis viscosa	S4:22(4,4,4,10)	22	4	9	8.9	12.3
	Physalis alkekengi	S3:18(4,6,8)	18	3	0.9	0.1	10.7			Physalis viscosa	S4:23(4,10,10)	23	4	5.8	2.6	2.1
	Physalis alkekengi	S3:18(6,6,6)	18	3	0.1	1.3	3.7			Physalis viscosa	S4:23(4,4,5,10)	23	4	24.7	47.9	34.9
	Physalis alkekengi	S3:19(5,6,8)	19	3	7.8	11.2	8.8			Physalis viscosa	S4:23(4,5,5,9)	23	4	0.7	0.3	1.1
	Physalis alkekengi	S3:20(6,6,8)	20	3	50.5	52.2	23			Physalis viscosa	S4:24(4,5,5,10)	24	4	25.7	20.3	20
	Physalis alkekengi	S3:21(5,8,8)	21	3	1.2	1.4	1.7			Physalis viscosa	S4:25(4,5,6,10)	25	4	5.5	2	2.9
	Physalis alkekengi	S3:22(6,8,8)	22	3	4.6	4.9	5.7			Physalis viscosa	S4:25(4,4,5,12)	25	4	5.9	3.3	3.9
	Physalis alkekengi	S3:23(6,8,9)	23	3	0.6	0.7	0.9			Physalis viscosa	S4:26(4,5,5,12)	26	4	0.9	0.3	0.3
	Physalis alkekengi	S4:22(4,6,6,6)	22	4	3.7	3	3.5			Physalis viscosa	S4:26(4,4,8,10)	26	4	1.9	1.7	2.4
	Physalis alkekengi	S4:23(4,5,6,8)	23	4	2.5	2.6	5.4			Physalis viscosa	S4:27(4,4,9,10)	27	4	4.6	2.3	2.1
	Physalis alkekengi	S4:24(4,6,6,8)	24	4	15.6	11	9			Physalis viscosa	S4:28(4,4,10,10)	28	4	0.7	0.3	0.2
	Physalis alkekengi	S4:24(4,4,8,8)	24	4	0.6	0.2	0.5
	Physalis alkekengi	S4:25(5,6,6,8)	25	4	2.6	2.7	1.8
	Physalis alkekengi	S4:25(4,5,8,8)	25	4	1.8	1.6	2.8
	Physalis alkekengi	S4:26(4,6,8,8)	26	4	3.7	3.2	5.3
	Physalis alkekengi	S4:26(6,6,6,8)	26	4	0	0	0.6
	Physalis alkekengi	S4:27(5,6,8,8)	27	4	1	1.1	1
	Physalis alkekengi	S4:28(6,6,8,8)	28	4	0	0.1	0.5

## Sheet: Icyaneum
	#Species	Sugar	NCarbons	Nchains	Petiole	Emerging leaf	Peduncle	Unopened flower
	Iochroma cyanea	S3:13(4,4,5)	13	3	0.3	0.6	0	0.6
	Iochroma cyanea	S3:14(4,5,5)	14	3	8.8	10.6	1.4	8.3
	Iochroma cyanea	S3:15(5,5,5)	15	3	12.2	10.9	7	8
	Iochroma cyanea	S3:16(5,5,6)	16	3	0.3	0.3	0.2	0.3
	Iochroma cyanea	S3:17(4,5,8)	17	3	0.1	0.2	0.1	0.1
	Iochroma cyanea	S3:18(5,5,8)	18	3	1.9	1.4	2.4	1.4
	Iochroma cyanea	S3:19(4,5,10)	19	3	2.5	4	3.2	2.5
	Iochroma cyanea	S3:20(5,5,10)	20	3	16.2	11.1	18	10
	Iochroma cyanea	S3:21(4,5,12)	21	3	8.7	10.5	9	7.4
	Iochroma cyanea	S3:21(5,5,11)	21	3	4.4	2.6	3.8	2.9
	Iochroma cyanea	S3:22(5,5,12)	22	3	26.7	20.2	31.9	18.9
	Iochroma cyanea	S4:24(4,5,5,10)	24	4	2.9	5.1	4.4	8.2
	Iochroma cyanea	S4:25(5,5,5,10)	25	4	5.4	8.3	8	13
	Iochroma cyanea	S4:25(4,4,5,12)	25	4	0.5	1.6	1	2.8
	Iochroma cyanea	S4:26(4,5,5,12)	26	4	8.9	12.6	9.6	15.5
	Iochroma cyanea	S4:27(5,5,5,12)	27	4	0	0	0	0

## Sheet: Abelladona
	#Species	Sugar	NCarbons	Nchains	Young leaf	Flower bud petals
	Atropa belladona	S3:14(4,5,5)	14	3	0	0.1
	Atropa belladona	S3:17(3,5,9)	17	3	2.1	0.6
	Atropa belladona	S3:18(5,5,8)	18	3	1	0.5
	Atropa belladona	S3:18(3,5,10)	18	3	6	3.8
	Atropa belladona	S3:19(5,5,9)	19	3	6.1	4.1
	Atropa belladona	S3:19(3,5,11)	19	3	16.4	16.8
	Atropa belladona	S3:20(4,5,11)	20	3	1.4	1.6
	Atropa belladona	S3:20(5,5,10)	20	3	44.6	27.9
	Atropa belladona	S3:20(3,5,12)	20	3	1.2	1.9
	Atropa belladona	S3:21(4,5,12)	21	3	4.1	12.5
	Atropa belladona	S3:21(5,5,11)	21	3	5.4	6.9
	Atropa belladona	S3:22(5,5,12)	22	3	11.8	23.4

## Sheet: Hniger
	#Species	Sugar	NCarbons	Nchains	Young leaf	Calyx	Stem
	Hyoscyamus niger	S3:17(4,5,8)	17	3	0.8	0.5	0.3
	Hyoscyamus niger	S3:18(5,5,8)	18	3	2.6	6.3	6.9
	Hyoscyamus niger	S3:19(4,5,10)	19	3	6.9	9.8	10.6
	Hyoscyamus niger	S3:19(5,5,9)	19	3	0.2	0.4	0.2
	Hyoscyamus niger	S3:20(4,5,11)	20	3	1.8	0	0.4
	Hyoscyamus niger	S3:20(5,5,10)	20	3	6.7	9.4	10.5
	Hyoscyamus niger	S3:21(4,5,12)	21	3	14.1	14.3	13.9
	Hyoscyamus niger	S3:21(5,5,11)	21	3	0.9	0.8	0.7
	Hyoscyamus niger	S3:22(5,5,12)	22	3	10.3	11.9	11.9
	Hyoscyamus niger	S3:23(5,5,13)	23	3	0.7	0.4	0.6
	Hyoscyamus niger	S4:15(2,4,4,5)	15	4	0.7	0.6	0.3
	Hyoscyamus niger	S4:16(2,4,5,5)	16	4	2.2	2.5	2.1
	Hyoscyamus niger	S4:17(2,5,5,5)	17	4	6.5	5.8	4.3
	Hyoscyamus niger	S4:18(2,4,4,8)	18	4	0.5	0.8	0.7
	Hyoscyamus niger	S4:19(2,4,5,8)	19	4	4.7	6.5	6.2
	Hyoscyamus niger	S4:20(2,4,5,9)	20	4	0.8	0.4	0.2
	Hyoscyamus niger	S4:20(2,4,4,10)	20	4	1.2	0.8	0.9
	Hyoscyamus niger	S4:20(2,5,5,8)	20	4	0	0	0
	Hyoscyamus niger	S4:21(2,5,5,9)	21	4	4	2.6	1.9
	Hyoscyamus niger	S4:21(2,4,5,10)	21	4	7.6	6.5	7.3
	Hyoscyamus niger	S4:22(2,5,5,10)	22	4	10.2	10.9	10.8
	Hyoscyamus niger	S4:23(2,5,5,11)	23	4	3.7	1	0.8
	Hyoscyamus niger	S4:23(2,4,5,12)	23	4	4.7	2.2	2.2
	Hyoscyamus niger	S4:24(2,5,5,12)	24	4	8.4	5.8	6.3

## Sheet: NalataWhite
	#Species	Sugar	NCarbons	Nchains	leaf	flower bud	stem
	Nicotiana alata white	S3:18(5,5,8)	18	3	1.7	1.3	1.3
	Nicotiana alata white	S3:19(5,6,8)	19	3	4.2	3.4	3.6
	Nicotiana alata white	S3:20(6,6,8)	20	3	1	0.6	0.6
	Nicotiana alata white	S3:20(4,8,8)	20	3	2.9	2.6	2.2
	Nicotiana alata white	S3:21(5,8,8)	21	3	8.6	9.6	10.3
	Nicotiana alata white	S3:23(7,8,8)	23	3	2.6	2.9	2.2
	Nicotiana alata white	S3:24(8,8,8)	24	3	2.4	2.6	2.2
	Nicotiana alata white	S4:18(2,8,8,8)	18	4	3	3.3	2.5
	Nicotiana alata white	S4:18(2,3,5,8)	18	4	1.6	1	1
	Nicotiana alata white	S4:19(2,5,5,7)	19	4	5.8	6.1	7.1
	Nicotiana alata white	S4:19(2,4,5,8)	19	4	0.7	1	0.5
	Nicotiana alata white	S4:20(2,5,5,8)	20	4	11.6	11.5	14.8
	Nicotiana alata white	S4:21(2,5,6,8)	21	4	13.2	12.4	12.6
	Nicotiana alata white	S4:22(2,4,8,8)	22	4	3.7	3.9	3.3
	Nicotiana alata white	S4:23(2,5,8,8)	23	4	10.2	12	14.6
	Nicotiana alata white	S4:24(2,6,8,8)	24	4	4.4	4.1	1.9
	Nicotiana alata white	S5:23(2,2,6,6,8)	23	5	0.9	0.6	0.6
	Nicotiana alata white	S5:23(2,2,5,6,8)	23	5	5.9	5.3	5.1
	Nicotiana alata white	S5:24(2,2,4,8,8)	24	5	1.4	1.5	1
	Nicotiana alata white	S5:24(2,2,5,8,8)	24	5	7.9	7.9	9
	Nicotiana alata white	S5:25(2,2,6,8,8)	25	5	3.7	3.1	1.4
	Nicotiana alata white	S5:28(2,2,8,8,8)	28	5	2.6	3.2	2.2

## Sheet: NalataYellow
	#Species	Sugar	NCarbons	Nchains	leaf	flower bud	stem
	Nicotiana alata yellow	S3:18(5,5,8)	18	3	0.2	0	0
	Nicotiana alata yellow	S3:19(5,6,8)	19	3	2.9	2.7	3.1
	Nicotiana alata yellow	S3:20(4,8,8)	20	3	3.1	3.8	3.8
	Nicotiana alata yellow	S3:21(5,8,8)	21	3	5.6	6.1	6.5
	Nicotiana alata yellow	S3:23(7,8,8)	23	3	0.8	0.6	0.7
	Nicotiana alata yellow	S3:24(8,8,8)	24	3	0.4	0	0.2
	Nicotiana alata yellow	S4:18(2,8,8,8)	18	4	1	0.5	0.8
	Nicotiana alata yellow	S4:19(2,5,5,7)	19	4	7.5	10.6	8.7
	Nicotiana alata yellow	S4:19(2,4,5,8)	19	4	8.1	8.8	8.2
	Nicotiana alata yellow	S4:20(2,5,5,8)	20	4	15.5	18.4	16.1
	Nicotiana alata yellow	S4:21(2,5,6,8)	21	4	10	8.6	9.5
	Nicotiana alata yellow	S4:22(2,4,8,8)	22	4	11.8	15.3	12.8
	Nicotiana alata yellow	S4:23(2,5,8,8)	23	4	11.1	12	11.6
	Nicotiana alata yellow	S4:24(2,6,8,8)	24	4	2	0.3	0.8
	Nicotiana alata yellow	S5:23(2,2,6,6,8)	23	5	0.5	0.9	0.7
	Nicotiana alata yellow	S5:23(2,2,5,6,8)	23	5	6.9	2.6	7.7
	Nicotiana alata yellow	S5:24(2,2,4,8,8)	24	5	1.9	2.5	2.3
	Nicotiana alata yellow	S5:24(2,2,5,8,8)	24	5	8.3	5.3	4.4
	Nicotiana alata yellow	S5:25(2,2,6,8,8)	25	5	1.3	0.4	1.2
	Nicotiana alata yellow	S5:28(2,2,8,8,8)	28	5	1.1	0.6	1

## Sheet: Ssinuata
	#Species	Sugar	NCarbons	Nchains	Petiole	Young leaf	Old leaf	Fruit with calyx
	Salpiglossis sinuata	S3:16(5,6,6)	16	3	1.5	1.1	2.8	2.7
	Salpiglossis sinuata	S3:16(2,5,5,6)	16	3	2	0.5	7.4	3
	Salpiglossis sinuata	S3:18(6,6,6)	18	3	0.8	1.2	0.6	1.5
	Salpiglossis sinuata	S4:16(2,3,5,6)	16	4	0.2	0	2	2.7
	Salpiglossis sinuata	S4:17(2,5,5,5)	17	4	0.1	0	1.7	0.9
	Salpiglossis sinuata	S4:17(2,4,5,6)	17	4	0.1	0	1.6	0.9
	Salpiglossis sinuata	S4:17(2,3,6,6)	17	4	0.8	0.4	1.5	4.1
	Salpiglossis sinuata	S4:18(2,4,6,6)	18	4	1	1.4	0.7	1.8
	Salpiglossis sinuata	S4:19(2,5,6,6)	19	4	11.2	10.8	13	15.7
	Salpiglossis sinuata	S4:20(3,5,6,6)	20	4	5.7	0.4	0	0
	Salpiglossis sinuata	S4:20(2,6,6,6)	20	4	2.9	5.6	3.9	10.3
	Salpiglossis sinuata	S4:21(4,5,6,6)	21	4	2	3.5	1.1	2.4
	Salpiglossis sinuata	S4:21(3,6,6,6)	21	4	1.3	1.5	1.6	1.9
	Salpiglossis sinuata	S4:21(5,5,5,6)	21	4	3.3	3.6	4.7	4.3
	Salpiglossis sinuata	S4:22(5,5,6,6)	22	4	5	5.6	5.8	5.8
	Salpiglossis sinuata	S4:22(4,6,6,6)	22	4	1	1.9	0.7	1.2
	Salpiglossis sinuata	S4:23(5,6,6,6)	23	4	7.5	9	7.1	6.1
	Salpiglossis sinuata	S4:24(6,6,6,6)	24	4	2	3.2	1.6	1.4
	Salpiglossis sinuata	S5:19(2,2,4,5,6)	19	5	1.9	1.4	2.3	1.7
	Salpiglossis sinuata	S5:20(2,2,5,5,6)	20	5	5.9	1.2	7.8	2.6
	Salpiglossis sinuata	S5:20(2,2,4,6,6)	20	5	0.3	2.6	0.4	1.3
	Salpiglossis sinuata	S5:21(2,2,5,6,6)	21	5	8.3	10.7	9.4	11.1
	Salpiglossis sinuata	S5:22(2,3,5,6,6)	22	5	8.3	7.4	8.7	7
	Salpiglossis sinuata	S5:23(2,5,5,5,6)	23	5	1.1	0.1	0.8	0.4
	Salpiglossis sinuata	S5:23(2,4,5,6,6)	23	5	7.1	8.5	4.5	3.6
	Salpiglossis sinuata	S5:24(2,5,5,6,6)	24	5	8.6	8.8	4	3.4
	Salpiglossis sinuata	S5:25(2,5,6,6,6)	25	5	3.9	4.1	1.7	1.2
	Salpiglossis sinuata	S5:26(2,6,6,6,6)	26	5	0.3	0.6	0.2	0.1
	Salpiglossis sinuata	S6:25(2,2,5,5,5,6)	25	6	1.3	1.2	0.4	0.2
	Salpiglossis sinuata	S6:26(2,2,5,5,6,6)	26	6	3.7	2.8	1.7	0.6
	Salpiglossis sinuata	S6:27(2,2,5,6,6,6)	27	6	0.7	0.9	0.3	0.1
