# Supplementary material for: Evolutionary routes to biochemical innovation revealed by integrative analysis of a plant-defense related specialized metabolic pathway
Source: eLife. 2017 Aug 30;6:e28468. doi: 10.7554/eLife.28468 (PMC5595436; doi:10.7554/eLife.28468)
Supplement: Figure 1—source data 5. — Sheet 5A shows the numerical counts of peaks shared between samples while Sheet 5B shows the percentage values centered on the row sample, as described in the legend. [file elife-28468-fig1-data5.xlsx]

## Sheet: MAIN
		Figure 1-Source Data 5	Data used to make Figure 1H. Sheet 5A shows the numerical counts of peaks shared between samples while Sheet 5B shows the percentage values centered on the row sample, as described in the legend

## Sheet: 5A
SpeciesName	Solanum brachyantherum (Young compound leaf)	Solanum conocarpum (Old leaf near midrib)	Solanum conocarpum (Petiole)	Solanum conocarpum (Stem)	Solanum eutuberosum (Petiole)	Solanum eutuberosum (Young leaf)	Solanum jasminoides (Leaf)	Solanum jasminoides (Opened flower)	Solanum jasminoides (Petiole)	Solanum pseudocapsicum (Opened flower)	Solanum pseudocapsicum (Stem)	Solanum pseudocapsicum (Young leaf)	Solanum quitoense left plant (Unopened flower calyx)	Solanum quitoense left plant (Young leaf)	Solanum spirale (Leaf)	Solanum spirale (Stem)	Solanum nigrum (Fruit)	Physalis peruviana (Flower)	Physalis peruviana (Leaf)	Physalis peruviana (Petiole)	Iochroma fuchsioides (Petiole)	Saracha aff. punctata (Petiole)	Saracha aff. punctata (Stem)	Saracha aff. punctata (Young leaf)	Capsicum annuum (Young leaf)	Capsicum annuum (Young leaf)	Capsicum chinense (Young leaf)	Lycianthes rantonnetii (Leaf)	Lycianthes rantonnetii (Petiole)	Brugmansia suaveolens L (Very young leaf)	Brugmansia suaveolens R (Flower petal)	Brugmansia suaveolens R (Unopened flower bud)	Mandragora autumnalis (Leaf lamina)	Juanulloa mexicana (Very young leaf)	Juanulloa mexicana (Very young leaf)	Juanulloa mexicana (Very young leaf)	Nicotiana sylvestris (Leaf)	Calibrochoa sp. (Leaf)	Calibrochoa sp. (Stem)	Cestrum diurnum (Fruit)	Cestrum diurnum (Opened flower)	Cestrum diurnum (Petiole)	Cestrum diurnum (Young leaf)	Goetzia sp. (Stem)	Goetzia sp. (Young leaf)	Ipomoea batatas margarita (Open leaf)	Ipomoea batatas margarita (Unopened young leaf)	Solanum nigrum (Stem)	Solanum nigrum (Young leaf)
Solanum brachyantherum (Young compound leaf)	59	2	1	1	4	4	2	3	5	3	1	0	1	4	2	1	3	2	1	1	2	1	6	8	14	14	11	7	0	3	1	11	11	24	24	24	1	0	1	11	10	11	8	2	3	7	5	0	1
Solanum conocarpum (Old leaf near midrib)	2	116	35	31	2	3	7	6	9	7	4	4	2	1	3	5	7	5	1	2	1	10	14	4	2	2	3	9	10	1	2	0	3	4	4	4	1	7	9	6	6	7	6	1	2	0	1	6	9
Solanum conocarpum (Petiole)	1	35	154	92	1	3	3	11	9	2	6	2	1	1	0	5	11	3	3	3	1	6	11	3	4	4	2	7	6	3	1	0	1	1	1	1	0	7	11	1	1	3	1	3	5	5	1	6	13
Solanum conocarpum (Stem)	1	31	92	166	2	1	6	13	6	4	7	2	0	2	0	5	13	4	1	2	0	5	7	4	3	3	2	4	0	1	2	0	2	0	0	0	0	5	10	4	4	6	3	3	2	3	1	8	11
Solanum eutuberosum (Petiole)	4	2	1	2	85	17	5	11	7	3	0	0	3	1	3	1	2	4	4	2	0	6	4	2	8	8	4	4	1	3	5	2	12	4	4	4	1	0	0	7	10	5	6	7	14	9	7	1	0
Solanum eutuberosum (Young leaf)	4	3	3	1	17	71	7	2	4	7	2	0	0	0	3	0	0	3	1	4	0	8	6	1	6	6	3	6	2	2	5	3	8	3	3	3	4	0	0	4	3	3	2	2	12	6	3	0	0
Solanum jasminoides (Leaf)	2	7	3	6	5	7	55	11	11	3	6	6	1	1	6	1	3	5	0	2	0	8	12	12	3	3	2	9	5	2	3	0	4	5	5	5	2	10	1	5	4	5	3	6	6	2	1	2	1
Solanum jasminoides (Opened flower)	3	6	11	13	11	2	11	156	32	15	5	2	2	5	3	3	12	14	2	3	1	2	12	7	8	8	5	7	6	4	1	0	5	11	11	11	0	5	7	10	31	10	9	10	8	6	4	6	9
Solanum jasminoides (Petiole)	5	9	9	6	7	4	11	32	95	2	5	3	4	4	5	3	10	4	3	2	1	5	12	12	7	7	5	9	10	1	2	2	4	11	11	11	1	6	3	9	11	6	6	5	4	3	2	3	8
Solanum pseudocapsicum (Opened flower)	3	7	2	4	3	7	3	15	2	171	8	2	0	0	10	10	1	10	6	4	0	4	6	5	1	1	3	6	6	0	6	1	5	2	2	2	5	0	0	9	25	11	8	0	4	4	1	2	1
Solanum pseudocapsicum (Stem)	1	4	6	7	0	2	6	5	5	8	78	7	1	0	1	5	7	1	2	2	0	7	5	2	1	1	2	1	2	1	3	0	3	2	2	2	3	2	0	5	4	7	2	3	4	1	1	9	4
Solanum pseudocapsicum (Young leaf)	0	4	2	2	0	0	6	2	3	2	7	29	0	0	3	3	1	2	2	3	0	1	3	3	0	0	1	1	1	2	0	0	0	1	1	1	3	1	1	0	0	0	0	1	0	0	1	4	1
Solanum quitoense left plant (Unopened flower calyx)	1	2	1	0	3	0	1	2	4	0	1	0	86	3	1	0	1	5	5	0	3	5	0	2	3	3	1	0	3	2	3	0	0	0	0	0	0	2	1	2	4	2	3	4	2	9	2	0	3
Solanum quitoense left plant (Young leaf)	4	1	1	2	1	0	1	5	4	0	0	0	3	39	0	0	2	2	3	1	3	2	2	4	32	32	5	2	3	12	0	2	3	9	9	9	1	2	3	3	5	2	3	6	0	9	8	0	1
Solanum spirale (Leaf)	2	3	0	0	3	3	6	3	5	10	1	3	1	0	38	5	2	6	3	3	1	4	2	5	2	2	3	4	5	0	0	1	2	4	4	4	2	0	1	5	6	7	6	1	2	1	1	0	1
Solanum spirale (Stem)	1	5	5	5	1	0	1	3	3	10	5	3	0	0	5	72	4	6	7	7	0	2	3	0	1	1	0	2	3	0	1	0	1	1	1	1	0	2	6	1	4	1	0	0	0	3	1	2	4
Solanum nigrum (Fruit)	3	7	11	13	2	0	3	12	10	1	7	1	1	2	2	4	97	1	2	0	0	8	6	5	3	3	2	3	3	1	0	1	2	7	7	7	1	4	4	3	5	6	5	3	1	0	0	22	36
Physalis peruviana (Flower)	2	5	3	4	4	3	5	14	4	10	1	2	5	2	6	6	1	141	31	32	0	2	1	1	3	3	4	2	0	2	0	0	2	2	2	2	0	2	3	4	13	4	4	4	7	3	1	1	3
Physalis peruviana (Leaf)	1	1	3	1	4	1	0	2	3	6	2	2	5	3	3	7	2	31	92	28	2	1	1	1	3	3	1	1	2	2	1	0	1	0	0	0	0	2	2	2	12	1	2	1	1	1	0	1	3
Physalis peruviana (Petiole)	1	2	3	2	2	4	2	3	2	4	2	3	0	1	3	7	0	32	28	79	0	2	2	1	2	2	2	2	2	1	0	0	2	2	2	2	0	1	4	2	4	4	1	2	3	2	0	0	0
Iochroma fuchsioides (Petiole)	2	1	1	0	0	0	0	1	1	0	0	0	3	3	1	0	0	0	2	0	51	3	3	4	6	6	1	3	8	2	0	2	2	20	20	20	0	0	1	3	1	3	1	2	1	3	9	0	2
Saracha aff. punctata (Petiole)	1	10	6	5	6	8	8	2	5	4	7	1	5	2	4	2	8	2	1	2	3	130	41	29	3	3	0	6	12	0	8	2	5	0	0	0	1	5	5	6	7	9	5	3	10	2	0	3	5
Saracha aff. punctata (Stem)	6	14	11	7	4	6	12	12	12	6	5	3	0	2	2	3	6	1	1	2	3	41	222	37	6	6	5	15	15	2	6	1	6	11	11	11	1	1	8	10	11	11	11	5	8	2	3	7	10
Saracha aff. punctata (Young leaf)	8	4	3	4	2	1	12	7	12	5	2	3	2	4	5	0	5	1	1	1	4	29	37	128	10	10	7	19	9	4	4	5	7	22	22	22	1	10	6	13	16	13	10	2	2	5	5	1	2
Capsicum annuum (Young leaf)	14	2	4	3	8	6	3	8	7	1	1	0	3	32	2	1	3	3	3	2	6	3	6	10	197	197	34	12	5	25	0	7	16	23	23	23	0	2	5	12	14	8	10	13	1	29	35	0	1
Capsicum annuum (Young leaf)	14	2	4	3	8	6	3	8	7	1	1	0	3	32	2	1	3	3	3	2	6	3	6	10	197	197	34	12	5	25	0	7	16	23	23	23	0	2	5	12	14	8	10	13	1	29	35	0	1
Capsicum chinense (Young leaf)	11	3	2	2	4	3	2	5	5	3	2	1	1	5	3	0	2	4	1	2	1	0	5	7	34	34	67	7	2	7	1	4	8	19	19	19	1	0	3	10	9	8	8	5	2	15	12	0	0
Lycianthes rantonnetii (Leaf)	7	9	7	4	4	6	9	7	9	6	1	1	0	2	4	2	3	2	1	2	3	6	15	19	12	12	7	80	16	5	0	6	7	18	18	18	0	9	10	17	16	18	12	7	4	7	8	1	2
Lycianthes rantonnetii (Petiole)	0	10	6	0	1	2	5	6	10	6	2	1	3	3	5	3	3	0	2	2	8	12	15	9	5	5	2	16	99	2	2	0	2	1	1	1	2	6	9	10	10	8	6	3	2	4	4	1	7
Brugmansia suaveolens L (Very young leaf)	3	1	3	1	3	2	2	4	1	0	1	2	2	12	0	0	1	2	2	1	2	0	2	4	25	25	7	5	2	71	0	4	4	6	6	6	0	0	2	3	4	1	4	7	0	11	9	0	0
Brugmansia suaveolens R (Flower petal)	1	2	1	2	5	5	3	1	2	6	3	0	3	0	0	1	0	0	1	0	0	8	6	4	0	0	1	0	2	0	400	20	6	1	1	1	1	1	1	6	7	2	0	0	4	7	3	2	0
Brugmansia suaveolens R (Unopened flower bud)	11	0	0	0	2	3	0	0	2	1	0	0	0	2	1	0	1	0	0	0	2	2	1	5	7	7	4	6	0	4	20	175	4	16	16	16	1	1	0	5	3	4	2	0	0	3	4	0	0
Mandragora autumnalis (Leaf lamina)	11	3	1	2	12	8	4	5	4	5	3	0	0	3	2	1	2	2	1	2	2	5	6	7	16	16	8	7	2	4	6	4	96	15	15	15	2	0	1	10	13	9	10	3	4	10	8	0	1
Juanulloa mexicana (Very young leaf)	24	4	1	0	4	3	5	11	11	2	2	1	0	9	4	1	7	2	0	2	20	0	11	22	23	23	19	18	1	6	1	16	15	255	255	255	0	1	0	25	26	30	24	6	7	14	17	0	0
Juanulloa mexicana (Very young leaf)	24	4	1	0	4	3	5	11	11	2	2	1	0	9	4	1	7	2	0	2	20	0	11	22	23	23	19	18	1	6	1	16	15	255	255	255	0	1	0	25	26	30	24	6	7	14	17	0	0
Juanulloa mexicana (Very young leaf)	24	4	1	0	4	3	5	11	11	2	2	1	0	9	4	1	7	2	0	2	20	0	11	22	23	23	19	18	1	6	1	16	15	255	255	255	0	1	0	25	26	30	24	6	7	14	17	0	0
Nicotiana sylvestris (Leaf)	1	1	0	0	1	4	2	0	1	5	3	3	0	1	2	0	1	0	0	0	0	1	1	1	0	0	1	0	2	0	1	1	2	0	0	0	163	1	0	1	1	1	0	0	2	1	1	2	1
Calibrochoa sp. (Leaf)	0	7	7	5	0	0	10	5	6	0	2	1	2	2	0	2	4	2	2	1	0	5	1	10	2	2	0	9	6	0	1	1	0	1	1	1	1	125	62	2	4	1	2	2	1	1	1	0	5
Calibrochoa sp. (Stem)	1	9	11	10	0	0	1	7	3	0	0	1	1	3	1	6	4	3	2	4	1	5	8	6	5	5	3	10	9	2	1	0	1	0	0	0	0	62	160	6	4	6	3	2	0	3	5	7	6
Cestrum diurnum (Fruit)	11	6	1	4	7	4	5	10	9	9	5	0	2	3	5	1	3	4	2	2	3	6	10	13	12	12	10	17	10	3	6	5	10	25	25	25	1	2	6	250	104	92	32	10	7	7	8	0	1
Cestrum diurnum (Opened flower)	10	6	1	4	10	3	4	31	11	25	4	0	4	5	6	4	5	13	12	4	1	7	11	16	14	14	9	16	10	4	7	3	13	26	26	26	1	4	4	104	318	80	35	10	6	17	7	0	4
Cestrum diurnum (Petiole)	11	7	3	6	5	3	5	10	6	11	7	0	2	2	7	1	6	4	1	4	3	9	11	13	8	8	8	18	8	1	2	4	9	30	30	30	1	1	6	92	80	167	32	9	11	7	7	3	4
Cestrum diurnum (Young leaf)	8	6	1	3	6	2	3	9	6	8	2	0	3	3	6	0	5	4	2	1	1	5	11	10	10	10	8	12	6	4	0	2	10	24	24	24	0	2	3	32	35	32	86	7	8	7	4	1	2
Goetzia sp. (Stem)	2	1	3	3	7	2	6	10	5	0	3	1	4	6	1	0	3	4	1	2	2	3	5	2	13	13	5	7	3	7	0	0	3	6	6	6	0	2	2	10	10	9	7	83	19	10	7	0	0
Goetzia sp. (Young leaf)	3	2	5	2	14	12	6	8	4	4	4	0	2	0	2	0	1	7	1	3	1	10	8	2	1	1	2	4	2	0	4	0	4	7	7	7	2	1	0	7	6	11	8	19	90	4	1	1	2
Ipomoea batatas margarita (Open leaf)	7	0	5	3	9	6	2	6	3	4	1	0	9	9	1	3	0	3	1	2	3	2	2	5	29	29	15	7	4	11	7	3	10	14	14	14	1	1	3	7	17	7	7	10	4	276	85	0	0
Ipomoea batatas margarita (Unopened young leaf)	5	1	1	1	7	3	1	4	2	1	1	1	2	8	1	1	0	1	0	0	9	0	3	5	35	35	12	8	4	9	3	4	8	17	17	17	1	1	5	8	7	7	4	7	1	85	159	0	0
Solanum nigrum (Stem)	0	6	6	8	1	0	2	6	3	2	9	4	0	0	0	2	22	1	1	0	0	3	7	1	0	0	0	1	1	0	2	0	0	0	0	0	2	0	7	0	0	3	1	0	1	0	0	284	74
Solanum nigrum (Young leaf)	1	9	13	11	0	0	1	9	8	1	4	1	3	1	1	4	36	3	3	0	2	5	10	2	1	1	0	2	7	0	0	0	1	0	0	0	1	5	6	1	4	4	2	0	2	0	0	74	188
Physalis alkekengi (Old leaf)	7	7	2	4	8	2	5	11	9	9	6	0	2	3	8	3	4	4	5	3	4	8	12	12	11	11	8	19	12	3	3	4	8	21	21	21	3	4	5	28	29	29	19	8	13	8	6	2	1
Physalis alkekengi (Orange calyx)	3	6	4	3	14	2	2	9	9	3	3	1	3	1	1	0	2	10	3	2	0	4	9	5	4	4	4	2	2	0	7	1	2	7	7	7	2	8	6	4	9	5	4	3	12	6	1	4	3
Physalis alkekengi (Petiole)	6	8	4	4	13	5	9	17	7	6	7	1	2	6	5	1	6	7	4	6	0	10	16	11	14	14	7	14	10	6	5	0	6	11	11	11	2	3	6	17	24	22	18	9	11	5	2	2	5
Physalis viscosa (Flower bud)	8	2	2	2	18	17	4	8	6	1	1	0	1	2	3	0	1	4	0	1	4	7	2	8	9	9	7	6	0	2	5	7	9	17	17	17	3	1	1	8	5	6	6	5	13	6	6	1	0
Physalis viscosa (Petiole)	10	1	1	0	17	9	4	6	6	2	1	0	2	4	4	2	3	4	1	1	5	6	4	13	14	14	9	8	3	3	11	4	15	22	22	22	4	1	3	11	12	11	9	7	9	11	9	0	0
Physalis viscosa (Young leaf)	10	2	2	1	12	7	5	7	7	2	1	0	2	2	3	0	3	3	0	1	4	5	3	8	10	10	6	8	0	3	3	6	16	20	20	20	1	1	0	8	6	6	7	8	9	4	4	0	0
Iochroma cyaneum (New emerging leaf)	4	0	1	1	3	1	0	1	2	1	0	0	1	5	2	0	1	2	0	0	14	0	4	6	11	11	5	5	5	3	3	3	3	10	10	10	0	1	1	3	0	3	0	6	5	11	20	1	1
Iochroma cyaneum (Peduncle)	5	0	1	1	1	2	0	0	1	0	2	0	2	4	1	0	0	0	0	0	6	0	4	9	15	15	8	5	2	4	0	4	4	21	21	21	0	0	1	7	4	7	5	6	1	19	24	1	0
Iochroma cyaneum (Petiole)	11	1	0	0	5	2	2	5	5	1	1	0	1	4	2	0	3	1	0	1	4	1	7	15	14	14	10	7	2	2	0	6	6	33	33	33	1	1	0	9	9	9	10	4	6	17	25	0	0
Iochroma cyaneum (Unopened flower)	10	0	2	0	4	7	2	3	6	1	1	0	0	1	2	1	3	1	0	2	3	1	4	12	14	14	9	10	5	4	2	6	5	31	31	31	1	1	1	8	7	10	7	4	5	18	24	0	0
Atropa belladonna (Flower bud petals)	9	1	1	0	7	6	3	5	6	1	4	0	3	3	1	1	3	2	0	3	1	5	6	8	11	11	7	10	3	5	2	3	6	16	16	16	2	3	2	11	9	12	12	11	20	5	6	1	0
Atropa belladonna (Young leaf)	10	1	0	1	4	7	4	4	3	2	2	0	2	3	2	0	2	1	0	1	2	2	5	6	11	11	8	7	2	4	2	4	11	25	25	25	1	1	1	8	8	7	10	3	5	8	6	0	0
Hyoscyamus niger (Calyx)	7	1	2	0	8	10	2	5	3	4	1	0	2	1	1	2	4	4	1	2	1	4	5	6	10	10	7	6	2	2	4	2	8	13	13	13	5	3	3	10	8	6	10	4	12	11	8	0	0
Hyoscyamus niger (Stem)	2	0	2	2	6	4	2	3	2	0	3	0	4	6	0	1	1	3	1	1	2	4	4	4	13	13	6	6	2	3	3	2	3	5	5	5	4	4	3	6	7	8	5	5	2	13	13	0	1
Hyoscyamus niger (Young leaf)	6	2	1	1	12	5	3	9	7	2	0	1	1	5	1	2	3	3	1	4	0	2	4	7	9	9	7	4	1	3	3	1	9	12	12	12	3	4	4	8	9	5	8	1	5	7	6	1	0
Nicotiana alata white (Flower bud)	0	4	7	6	0	0	2	8	9	1	2	1	3	2	1	2	4	3	3	7	1	3	1	4	3	3	1	1	6	1	2	0	0	5	5	5	1	21	29	5	3	3	1	4	3	1	1	7	5
Nicotiana alata white (Leaf)	2	6	9	10	0	0	4	12	6	1	3	0	1	3	1	3	9	3	2	2	0	6	9	4	5	5	6	5	3	4	1	0	1	7	7	7	3	17	31	5	5	5	4	4	2	1	2	8	12
Nicotiana alata white (Stem)	1	5	6	6	2	0	1	5	4	1	6	2	1	1	0	1	4	3	5	4	0	2	4	3	1	1	1	4	2	0	1	0	1	3	3	3	2	7	11	1	2	3	3	2	2	2	1	10	7
Nicotiana alata yellow (Flower bud)	0	7	7	5	1	0	4	5	4	0	1	2	1	2	0	1	5	5	4	4	2	4	5	3	3	3	1	4	6	2	1	0	0	0	0	0	2	10	19	3	3	1	2	4	2	3	4	8	7
Nicotiana alata yellow (Leaf)	0	0	2	1	0	0	0	1	0	0	1	0	2	1	0	3	2	2	3	3	1	1	5	1	0	0	0	1	4	0	1	0	0	0	0	0	1	2	4	0	0	1	2	0	1	2	1	5	2
Nicotiana alata yellow (Stem)	1	2	6	9	4	2	3	15	12	1	4	2	1	1	3	3	11	3	2	1	0	4	1	3	1	1	3	2	4	1	0	0	1	6	6	6	1	6	5	4	10	3	3	1	3	0	2	10	9
Nicotiana sp. (Petiole)	5	3	2	2	4	5	3	6	6	2	2	0	6	10	0	0	4	3	3	1	3	0	4	4	14	14	5	6	5	10	0	0	4	8	8	8	2	2	2	7	8	7	5	10	2	6	5	0	0
Nicotiana sp. (Young leaf)	10	2	3	0	6	6	2	5	8	3	2	0	3	8	3	2	4	2	3	1	1	3	3	9	26	26	12	8	3	10	0	3	11	17	17	17	1	2	1	9	10	8	13	5	8	10	10	3	1
Salpiglossis sinuata (Fruit with calyx)	1	3	4	1	0	2	1	0	0	0	1	0	4	0	1	1	3	1	1	1	4	1	3	3	2	2	1	7	7	2	2	2	0	3	3	3	0	4	1	8	4	6	5	6	10	2	3	1	2
Salpiglossis sinuata (Old leaf)	4	1	2	1	7	4	4	4	3	2	0	0	2	2	2	1	3	3	0	1	0	4	6	5	6	6	4	7	0	3	6	5	7	10	10	10	0	3	1	7	8	7	8	11	13	4	1	1	0
Salpiglossis sinuata (Petiole)	5	2	1	2	4	4	3	6	5	2	1	0	4	2	1	0	5	2	1	2	0	4	4	5	6	6	7	7	3	3	3	3	8	10	10	10	0	3	2	13	15	11	12	8	9	6	1	0	0
Salpiglossis sinuata (Young leaf)	6	2	1	1	5	5	5	6	3	3	3	0	5	4	2	0	3	4	1	3	1	6	5	5	10	10	7	6	3	4	3	1	7	11	11	11	2	5	5	10	14	9	11	8	13	5	3	1	0
[truncated: 27 more columns]

## Sheet: 5B
SpeciesName	Solanum brachyantherum (Young compound leaf)	Solanum conocarpum (Old leaf near midrib)	Solanum conocarpum (Petiole)	Solanum conocarpum (Stem)	Solanum eutuberosum (Petiole)	Solanum eutuberosum (Young leaf)	Solanum jasminoides (Leaf)	Solanum jasminoides (Opened flower)	Solanum jasminoides (Petiole)	Solanum pseudocapsicum (Opened flower)	Solanum pseudocapsicum (Stem)	Solanum pseudocapsicum (Young leaf)	Solanum quitoense left plant (Unopened flower calyx)	Solanum quitoense left plant (Young leaf)	Solanum spirale (Leaf)	Solanum spirale (Stem)	Solanum nigrum (Fruit)	Physalis peruviana (Flower)	Physalis peruviana (Leaf)	Physalis peruviana (Petiole)	Iochroma fuchsioides (Petiole)	Saracha aff. punctata (Petiole)	Saracha aff. punctata (Stem)	Saracha aff. punctata (Young leaf)	Capsicum annuum (Young leaf)	Capsicum chinense (Young leaf)	Lycianthes rantonnetii (Leaf)	Lycianthes rantonnetii (Petiole)	Brugmansia suaveolens L (Very young leaf)	Brugmansia suaveolens R (Flower petal)	Brugmansia suaveolens R (Unopened flower bud)	Mandragora autumnalis (Leaf lamina)	Juanulloa mexicana (Very young leaf)	Nicotiana sylvestris (Leaf)	Calibrochoa sp. (Leaf)	Calibrochoa sp. (Stem)	Cestrum diurnum (Fruit)	Cestrum diurnum (Opened flower)	Cestrum diurnum (Petiole)	Cestrum diurnum (Young leaf)	Goetzia sp. (Stem)	Goetzia sp. (Young leaf)	Ipomoea batatas margarita (Open leaf)	Ipomoea batatas margarita (Unopened young leaf)		Solanum nigrum (Stem)	Solanum nigrum (Young leaf)	Physalis alkekengi (Old leaf)	Physalis alkekengi (Orange calyx)
Solanum brachyantherum (Young compound leaf)	100	3.4	1.7	1.7	6.8	6.8	3.4	5.1	8.5	5.1	1.7	0	1.7	6.8	3.4	1.7	5.1	3.4	1.7	1.7	3.4	1.7	10.2	13.6	23.7	18.6	11.9	0	5.1	1.7	18.6	18.6	40.7	1.7	0	1.7	18.6	16.9	18.6	13.6	3.4	5.1	11.9	8.5		0	1.7	11.9	5.1
Solanum conocarpum (Old leaf near midrib)	1.7	100	30.2	26.7	1.7	2.6	6	5.2	7.8	6	3.4	3.4	1.7	0.9	2.6	4.3	6	4.3	0.9	1.7	0.9	8.6	12.1	3.4	1.7	2.6	7.8	8.6	0.9	1.7	0	2.6	3.4	0.9	6	7.8	5.2	5.2	6	5.2	0.9	1.7	0	0.9		5.2	7.8	6	5.2
Solanum conocarpum (Petiole)	0.6	22.7	100	59.7	0.6	1.9	1.9	7.1	5.8	1.3	3.9	1.3	0.6	0.6	0	3.2	7.1	1.9	1.9	1.9	0.6	3.9	7.1	1.9	2.6	1.3	4.5	3.9	1.9	0.6	0	0.6	0.6	0	4.5	7.1	0.6	0.6	1.9	0.6	1.9	3.2	3.2	0.6		3.9	8.4	1.3	2.6
Solanum conocarpum (Stem)	0.6	18.7	55.4	100	1.2	0.6	3.6	7.8	3.6	2.4	4.2	1.2	0	1.2	0	3	7.8	2.4	0.6	1.2	0	3	4.2	2.4	1.8	1.2	2.4	0	0.6	1.2	0	1.2	0	0	3	6	2.4	2.4	3.6	1.8	1.8	1.2	1.8	0.6		4.8	6.6	2.4	1.8
Solanum eutuberosum (Petiole)	4.7	2.4	1.2	2.4	100	20	5.9	12.9	8.2	3.5	0	0	3.5	1.2	3.5	1.2	2.4	4.7	4.7	2.4	0	7.1	4.7	2.4	9.4	4.7	4.7	1.2	3.5	5.9	2.4	14.1	4.7	1.2	0	0	8.2	11.8	5.9	7.1	8.2	16.5	10.6	8.2		1.2	0	9.4	16.5
Solanum eutuberosum (Young leaf)	5.6	4.2	4.2	1.4	23.9	100	9.9	2.8	5.6	9.9	2.8	0	0	0	4.2	0	0	4.2	1.4	5.6	0	11.3	8.5	1.4	8.5	4.2	8.5	2.8	2.8	7	4.2	11.3	4.2	5.6	0	0	5.6	4.2	4.2	2.8	2.8	16.9	8.5	4.2		0	0	2.8	2.8
Solanum jasminoides (Leaf)	3.6	12.7	5.5	10.9	9.1	12.7	100	20	20	5.5	10.9	10.9	1.8	1.8	10.9	1.8	5.5	9.1	0	3.6	0	14.5	21.8	21.8	5.5	3.6	16.4	9.1	3.6	5.5	0	7.3	9.1	3.6	18.2	1.8	9.1	7.3	9.1	5.5	10.9	10.9	3.6	1.8		3.6	1.8	9.1	3.6
Solanum jasminoides (Opened flower)	1.9	3.8	7.1	8.3	7.1	1.3	7.1	100	20.5	9.6	3.2	1.3	1.3	3.2	1.9	1.9	7.7	9	1.3	1.9	0.6	1.3	7.7	4.5	5.1	3.2	4.5	3.8	2.6	0.6	0	3.2	7.1	0	3.2	4.5	6.4	19.9	6.4	5.8	6.4	5.1	3.8	2.6		3.8	5.8	7.1	5.8
Solanum jasminoides (Petiole)	5.3	9.5	9.5	6.3	7.4	4.2	11.6	33.7	100	2.1	5.3	3.2	4.2	4.2	5.3	3.2	10.5	4.2	3.2	2.1	1.1	5.3	12.6	12.6	7.4	5.3	9.5	10.5	1.1	2.1	2.1	4.2	11.6	1.1	6.3	3.2	9.5	11.6	6.3	6.3	5.3	4.2	3.2	2.1		3.2	8.4	9.5	9.5
Solanum pseudocapsicum (Opened flower)	1.8	4.1	1.2	2.3	1.8	4.1	1.8	8.8	1.2	100	4.7	1.2	0	0	5.8	5.8	0.6	5.8	3.5	2.3	0	2.3	3.5	2.9	0.6	1.8	3.5	3.5	0	3.5	0.6	2.9	1.2	2.9	0	0	5.3	14.6	6.4	4.7	0	2.3	2.3	0.6		1.2	0.6	5.3	1.8
Solanum pseudocapsicum (Stem)	1.3	5.1	7.7	9	0	2.6	7.7	6.4	6.4	10.3	100	9	1.3	0	1.3	6.4	9	1.3	2.6	2.6	0	9	6.4	2.6	1.3	2.6	1.3	2.6	1.3	3.8	0	3.8	2.6	3.8	2.6	0	6.4	5.1	9	2.6	3.8	5.1	1.3	1.3		11.5	5.1	7.7	3.8
Solanum pseudocapsicum (Young leaf)	0	13.8	6.9	6.9	0	0	20.7	6.9	10.3	6.9	24.1	100	0	0	10.3	10.3	3.4	6.9	6.9	10.3	0	3.4	10.3	10.3	0	3.4	3.4	3.4	6.9	0	0	0	3.4	10.3	3.4	3.4	0	0	0	0	3.4	0	0	3.4		13.8	3.4	0	3.4
Solanum quitoense left plant (Unopened flower calyx)	1.2	2.3	1.2	0	3.5	0	1.2	2.3	4.7	0	1.2	0	100	3.5	1.2	0	1.2	5.8	5.8	0	3.5	5.8	0	2.3	3.5	1.2	0	3.5	2.3	3.5	0	0	0	0	2.3	1.2	2.3	4.7	2.3	3.5	4.7	2.3	10.5	2.3		0	3.5	2.3	3.5
Solanum quitoense left plant (Young leaf)	10.3	2.6	2.6	5.1	2.6	0	2.6	12.8	10.3	0	0	0	7.7	100	0	0	5.1	5.1	7.7	2.6	7.7	5.1	5.1	10.3	82.1	12.8	5.1	7.7	30.8	0	5.1	7.7	23.1	2.6	5.1	7.7	7.7	12.8	5.1	7.7	15.4	0	23.1	20.5		0	2.6	7.7	2.6
Solanum spirale (Leaf)	5.3	7.9	0	0	7.9	7.9	15.8	7.9	13.2	26.3	2.6	7.9	2.6	0	100	13.2	5.3	15.8	7.9	7.9	2.6	10.5	5.3	13.2	5.3	7.9	10.5	13.2	0	0	2.6	5.3	10.5	5.3	0	2.6	13.2	15.8	18.4	15.8	2.6	5.3	2.6	2.6		0	2.6	21.1	2.6
Solanum spirale (Stem)	1.4	6.9	6.9	6.9	1.4	0	1.4	4.2	4.2	13.9	6.9	4.2	0	0	6.9	100	5.6	8.3	9.7	9.7	0	2.8	4.2	0	1.4	0	2.8	4.2	0	1.4	0	1.4	1.4	0	2.8	8.3	1.4	5.6	1.4	0	0	0	4.2	1.4		2.8	5.6	4.2	0
Solanum nigrum (Fruit)	3.1	7.2	11.3	13.4	2.1	0	3.1	12.4	10.3	1	7.2	1	1	2.1	2.1	4.1	100	1	2.1	0	0	8.2	6.2	5.2	3.1	2.1	3.1	3.1	1	0	1	2.1	7.2	1	4.1	4.1	3.1	5.2	6.2	5.2	3.1	1	0	0		22.7	37.1	4.1	2.1
Physalis peruviana (Flower)	1.4	3.5	2.1	2.8	2.8	2.1	3.5	9.9	2.8	7.1	0.7	1.4	3.5	1.4	4.3	4.3	0.7	100	22	22.7	0	1.4	0.7	0.7	2.1	2.8	1.4	0	1.4	0	0	1.4	1.4	0	1.4	2.1	2.8	9.2	2.8	2.8	2.8	5	2.1	0.7		0.7	2.1	2.8	7.1
Physalis peruviana (Leaf)	1.1	1.1	3.3	1.1	4.3	1.1	0	2.2	3.3	6.5	2.2	2.2	5.4	3.3	3.3	7.6	2.2	33.7	100	30.4	2.2	1.1	1.1	1.1	3.3	1.1	1.1	2.2	2.2	1.1	0	1.1	0	0	2.2	2.2	2.2	13	1.1	2.2	1.1	1.1	1.1	0		1.1	3.3	5.4	3.3
Physalis peruviana (Petiole)	1.3	2.5	3.8	2.5	2.5	5.1	2.5	3.8	2.5	5.1	2.5	3.8	0	1.3	3.8	8.9	0	40.5	35.4	100	0	2.5	2.5	1.3	2.5	2.5	2.5	2.5	1.3	0	0	2.5	2.5	0	1.3	5.1	2.5	5.1	5.1	1.3	2.5	3.8	2.5	0		0	0	3.8	2.5
Iochroma fuchsioides (Petiole)	3.9	2	2	0	0	0	0	2	2	0	0	0	5.9	5.9	2	0	0	0	3.9	0	100	5.9	5.9	7.8	11.8	2	5.9	15.7	3.9	0	3.9	3.9	39.2	0	0	2	5.9	2	5.9	2	3.9	2	5.9	17.6		0	3.9	7.8	0
Saracha aff. punctata (Petiole)	0.8	7.7	4.6	3.8	4.6	6.2	6.2	1.5	3.8	3.1	5.4	0.8	3.8	1.5	3.1	1.5	6.2	1.5	0.8	1.5	2.3	100	31.5	22.3	2.3	0	4.6	9.2	0	6.2	1.5	3.8	0	0.8	3.8	3.8	4.6	5.4	6.9	3.8	2.3	7.7	1.5	0		2.3	3.8	6.2	3.1
Saracha aff. punctata (Stem)	2.7	6.3	5	3.2	1.8	2.7	5.4	5.4	5.4	2.7	2.3	1.4	0	0.9	0.9	1.4	2.7	0.5	0.5	0.9	1.4	18.5	100	16.7	2.7	2.3	6.8	6.8	0.9	2.7	0.5	2.7	5	0.5	0.5	3.6	4.5	5	5	5	2.3	3.6	0.9	1.4		3.2	4.5	5.4	4.1
Saracha aff. punctata (Young leaf)	6.2	3.1	2.3	3.1	1.6	0.8	9.4	5.5	9.4	3.9	1.6	2.3	1.6	3.1	3.9	0	3.9	0.8	0.8	0.8	3.1	22.7	28.9	100	7.8	5.5	14.8	7	3.1	3.1	3.9	5.5	17.2	0.8	7.8	4.7	10.2	12.5	10.2	7.8	1.6	1.6	3.9	3.9		0.8	1.6	9.4	3.9
Capsicum annuum (Young leaf)	7.1	1	2	1.5	4.1	3	1.5	4.1	3.6	0.5	0.5	0	1.5	16.2	1	0.5	1.5	1.5	1.5	1	3	1.5	3	5.1	100	17.3	6.1	2.5	12.7	0	3.6	8.1	11.7	0	1	2.5	6.1	7.1	4.1	5.1	6.6	0.5	14.7	17.8		0	0.5	5.6	2
Capsicum chinense (Young leaf)	16.4	4.5	3	3	6	4.5	3	7.5	7.5	4.5	3	1.5	1.5	7.5	4.5	0	3	6	1.5	3	1.5	0	7.5	10.4	50.7	100	10.4	3	10.4	1.5	6	11.9	28.4	1.5	0	4.5	14.9	13.4	11.9	11.9	7.5	3	22.4	17.9		0	0	11.9	6
Lycianthes rantonnetii (Leaf)	8.8	11.2	8.8	5	5	7.5	11.2	8.8	11.2	7.5	1.2	1.2	0	2.5	5	2.5	3.8	2.5	1.2	2.5	3.8	7.5	18.8	23.8	15	8.8	100	20	6.2	0	7.5	8.8	22.5	0	11.2	12.5	21.2	20	22.5	15	8.8	5	8.8	10		1.2	2.5	23.8	2.5
Lycianthes rantonnetii (Petiole)	0	10.1	6.1	0	1	2	5.1	6.1	10.1	6.1	2	1	3	3	5.1	3	3	0	2	2	8.1	12.1	15.2	9.1	5.1	2	16.2	100	2	2	0	2	1	2	6.1	9.1	10.1	10.1	8.1	6.1	3	2	4	4		1	7.1	12.1	2
Brugmansia suaveolens L (Very young leaf)	4.2	1.4	4.2	1.4	4.2	2.8	2.8	5.6	1.4	0	1.4	2.8	2.8	16.9	0	0	1.4	2.8	2.8	1.4	2.8	0	2.8	5.6	35.2	9.9	7	2.8	100	0	5.6	5.6	8.5	0	0	2.8	4.2	5.6	1.4	5.6	9.9	0	15.5	12.7		0	0	4.2	0
Brugmansia suaveolens R (Flower petal)	0.2	0.5	0.2	0.5	1.2	1.2	0.8	0.2	0.5	1.5	0.8	0	0.8	0	0	0.2	0	0	0.2	0	0	2	1.5	1	0	0.2	0	0.5	0	100	5	1.5	0.2	0.2	0.2	0.2	1.5	1.8	0.5	0	0	1	1.8	0.8		0.5	0	0.8	1.8
Brugmansia suaveolens R (Unopened flower bud)	6.3	0	0	0	1.1	1.7	0	0	1.1	0.6	0	0	0	1.1	0.6	0	0.6	0	0	0	1.1	1.1	0.6	2.9	4	2.3	3.4	0	2.3	11.4	100	2.3	9.1	0.6	0.6	0	2.9	1.7	2.3	1.1	0	0	1.7	2.3		0	0	2.3	0.6
Mandragora autumnalis (Leaf lamina)	11.5	3.1	1	2.1	12.5	8.3	4.2	5.2	4.2	5.2	3.1	0	0	3.1	2.1	1	2.1	2.1	1	2.1	2.1	5.2	6.2	7.3	16.7	8.3	7.3	2.1	4.2	6.2	4.2	100	15.6	2.1	0	1	10.4	13.5	9.4	10.4	3.1	4.2	10.4	8.3		0	1	8.3	2.1
Juanulloa mexicana (Very young leaf)	9.4	1.6	0.4	0	1.6	1.2	2	4.3	4.3	0.8	0.8	0.4	0	3.5	1.6	0.4	2.7	0.8	0	0.8	7.8	0	4.3	8.6	9	7.5	7.1	0.4	2.4	0.4	6.3	5.9	100	0	0.4	0	9.8	10.2	11.8	9.4	2.4	2.7	5.5	6.7		0	0	8.2	2.7
Nicotiana sylvestris (Leaf)	0.6	0.6	0	0	0.6	2.5	1.2	0	0.6	3.1	1.8	1.8	0	0.6	1.2	0	0.6	0	0	0	0	0.6	0.6	0.6	0	0.6	0	1.2	0	0.6	0.6	1.2	0	100	0.6	0	0.6	0.6	0.6	0	0	1.2	0.6	0.6		1.2	0.6	1.8	1.2
Calibrochoa sp. (Leaf)	0	5.6	5.6	4	0	0	8	4	4.8	0	1.6	0.8	1.6	1.6	0	1.6	3.2	1.6	1.6	0.8	0	4	0.8	8	1.6	0	7.2	4.8	0	0.8	0.8	0	0.8	0.8	100	49.6	1.6	3.2	0.8	1.6	1.6	0.8	0.8	0.8		0	4	3.2	6.4
Calibrochoa sp. (Stem)	0.6	5.6	6.9	6.2	0	0	0.6	4.4	1.9	0	0	0.6	0.6	1.9	0.6	3.8	2.5	1.9	1.2	2.5	0.6	3.1	5	3.8	3.1	1.9	6.2	5.6	1.2	0.6	0	0.6	0	0	38.8	100	3.8	2.5	3.8	1.9	1.2	0	1.9	3.1		4.4	3.8	3.1	3.8
Cestrum diurnum (Fruit)	4.4	2.4	0.4	1.6	2.8	1.6	2	4	3.6	3.6	2	0	0.8	1.2	2	0.4	1.2	1.6	0.8	0.8	1.2	2.4	4	5.2	4.8	4	6.8	4	1.2	2.4	2	4	10	0.4	0.8	2.4	100	41.6	36.8	12.8	4	2.8	2.8	3.2		0	0.4	11.2	1.6
Cestrum diurnum (Opened flower)	3.1	1.9	0.3	1.3	3.1	0.9	1.3	9.7	3.5	7.9	1.3	0	1.3	1.6	1.9	1.3	1.6	4.1	3.8	1.3	0.3	2.2	3.5	5	4.4	2.8	5	3.1	1.3	2.2	0.9	4.1	8.2	0.3	1.3	1.3	32.7	100	25.2	11	3.1	1.9	5.3	2.2		0	1.3	9.1	2.8
Cestrum diurnum (Petiole)	6.6	4.2	1.8	3.6	3	1.8	3	6	3.6	6.6	4.2	0	1.2	1.2	4.2	0.6	3.6	2.4	0.6	2.4	1.8	5.4	6.6	7.8	4.8	4.8	10.8	4.8	0.6	1.2	2.4	5.4	18	0.6	0.6	3.6	55.1	47.9	100	19.2	5.4	6.6	4.2	4.2		1.8	2.4	17.4	3
Cestrum diurnum (Young leaf)	9.3	7	1.2	3.5	7	2.3	3.5	10.5	7	9.3	2.3	0	3.5	3.5	7	0	5.8	4.7	2.3	1.2	1.2	5.8	12.8	11.6	11.6	9.3	14	7	4.7	0	2.3	11.6	27.9	0	2.3	3.5	37.2	40.7	37.2	100	8.1	9.3	8.1	4.7		1.2	2.3	22.1	4.7
Goetzia sp. (Stem)	2.4	1.2	3.6	3.6	8.4	2.4	7.2	12	6	0	3.6	1.2	4.8	7.2	1.2	0	3.6	4.8	1.2	2.4	2.4	3.6	6	2.4	15.7	6	8.4	3.6	8.4	0	0	3.6	7.2	0	2.4	2.4	12	12	10.8	8.4	100	22.9	12	8.4		0	0	9.6	3.6
Goetzia sp. (Young leaf)	3.3	2.2	5.6	2.2	15.6	13.3	6.7	8.9	4.4	4.4	4.4	0	2.2	0	2.2	0	1.1	7.8	1.1	3.3	1.1	11.1	8.9	2.2	1.1	2.2	4.4	2.2	0	4.4	0	4.4	7.8	2.2	1.1	0	7.8	6.7	12.2	8.9	21.1	100	4.4	1.1		1.1	2.2	14.4	13.3
Ipomoea batatas margarita (Open leaf)	2.5	0	1.8	1.1	3.3	2.2	0.7	2.2	1.1	1.4	0.4	0	3.3	3.3	0.4	1.1	0	1.1	0.4	0.7	1.1	0.7	0.7	1.8	10.5	5.4	2.5	1.4	4	2.5	1.1	3.6	5.1	0.4	0.4	1.1	2.5	6.2	2.5	2.5	3.6	1.4	100	30.8		0	0	2.9	2.2
Ipomoea batatas margarita (Unopened young leaf)	3.1	0.6	0.6	0.6	4.4	1.9	0.6	2.5	1.3	0.6	0.6	0.6	1.3	5	0.6	0.6	0	0.6	0	0	5.7	0	1.9	3.1	22	7.5	5	2.5	5.7	1.9	2.5	5	10.7	0.6	0.6	3.1	5	4.4	4.4	2.5	4.4	0.6	53.5	100		0	0	3.8	0.6
Solanum nigrum (Stem)	0	2.1	2.1	2.8	0.4	0	0.7	2.1	1.1	0.7	3.2	1.4	0	0	0	0.7	7.7	0.4	0.4	0	0	1.1	2.5	0.4	0	0	0.4	0.4	0	0.7	0	0	0	0.7	0	2.5	0	0	1.1	0.4	0	0.4	0	0		100	26.1	0.7	1.4
Solanum nigrum (Young leaf)	0.5	4.8	6.9	5.9	0	0	0.5	4.8	4.3	0.5	2.1	0.5	1.6	0.5	0.5	2.1	19.1	1.6	1.6	0	1.1	2.7	5.3	1.1	0.5	0	1.1	3.7	0	0	0	0.5	0	0.5	2.7	3.2	0.5	2.1	2.1	1.1	0	1.1	0	0		39.4	100	0.5	1.6
Physalis alkekengi (Old leaf)	5.1	5.1	1.5	2.9	5.9	1.5	3.7	8.1	6.6	6.6	4.4	0	1.5	2.2	5.9	2.2	2.9	2.9	3.7	2.2	2.9	5.9	8.8	8.8	8.1	5.9	14	8.8	2.2	2.2	2.9	5.9	15.4	2.2	2.9	3.7	20.6	21.3	21.3	14	5.9	9.6	5.9	4.4		1.5	0.7	100	22.8
Physalis alkekengi (Orange calyx)	0.4	0.8	0.5	0.4	1.8	0.3	0.3	1.2	1.2	0.4	0.4	0.1	0.4	0.1	0.1	0	0.3	1.3	0.4	0.3	0	0.5	1.2	0.7	0.5	0.5	0.3	0.3	0	0.9	0.1	0.3	0.9	0.3	1	0.8	0.5	1.2	0.7	0.5	0.4	1.6	0.8	0.1		0.5	0.4	4.1	100
Physalis alkekengi (Petiole)	2.9	3.9	2	2	6.4	2.5	4.4	8.3	3.4	2.9	3.4	0.5	1	2.9	2.5	0.5	2.9	3.4	2	2.9	0	4.9	7.8	5.4	6.9	3.4	6.9	4.9	2.9	2.5	0	2.9	5.4	1	1.5	2.9	8.3	11.8	10.8	8.8	4.4	5.4	2.5	1		1	2.5	26.5	31.9
Physalis viscosa (Flower bud)	3.2	0.8	0.8	0.8	7.2	6.8	1.6	3.2	2.4	0.4	0.4	0	0.4	0.8	1.2	0	0.4	1.6	0	0.4	1.6	2.8	0.8	3.2	3.6	2.8	2.4	0	0.8	2	2.8	3.6	6.8	1.2	0.4	0.4	3.2	2	2.4	2.4	2	5.2	2.4	2.4		0.4	0	3.6	4.4
Physalis viscosa (Petiole)	2.6	0.3	0.3	0	4.4	2.3	1	1.6	1.6	0.5	0.3	0	0.5	1	1	0.5	0.8	1	0.3	0.3	1.3	1.6	1	3.4	3.7	2.3	2.1	0.8	0.8	2.9	1	3.9	5.7	1	0.3	0.8	2.9	3.1	2.9	2.3	1.8	2.3	2.9	2.3		0	0	3.4	3.4
Physalis viscosa (Young leaf)	5.9	1.2	1.2	0.6	7.1	4.1	2.9	4.1	4.1	1.2	0.6	0	1.2	1.2	1.8	0	1.8	1.8	0	0.6	2.4	2.9	1.8	4.7	5.9	3.5	4.7	0	1.8	1.8	3.5	9.4	11.8	0.6	0.6	0	4.7	3.5	3.5	4.1	4.7	5.3	2.4	2.4		0	0	4.7	4.1
Iochroma cyaneum (New emerging leaf)	1.2	0	0.3	0.3	0.9	0.3	0	0.3	0.6	0.3	0	0	0.3	1.6	0.6	0	0.3	0.6	0	0	4.4	0	1.2	1.9	3.4	1.6	1.6	1.6	0.9	0.9	0.9	0.9	3.1	0	0.3	0.3	0.9	0	0.9	0	1.9	1.6	3.4	6.2		0.3	0.3	0.6	2.8
Iochroma cyaneum (Peduncle)	1.4	0	0.3	0.3	0.3	0.5	0	0	0.3	0	0.5	0	0.5	1.1	0.3	0	0	0	0	0	1.6	0	1.1	2.5	4.1	2.2	1.4	0.5	1.1	0	1.1	1.1	5.8	0	0	0.3	1.9	1.1	1.9	1.4	1.6	0.3	5.2	6.6		0.3	0	1.9	2.2
Iochroma cyaneum (Petiole)	3.7	0.3	0	0	1.7	0.7	0.7	1.7	1.7	0.3	0.3	0	0.3	1.4	0.7	0	1	0.3	0	0.3	1.4	0.3	2.4	5.1	4.7	3.4	2.4	0.7	0.7	0	2	2	11.1	0.3	0.3	0	3	3	3	3.4	1.4	2	5.7	8.4		0	0	3	2.7
Iochroma cyaneum (Unopened flower)	2.4	0	0.5	0	1	1.7	0.5	0.7	1.4	0.2	0.2	0	0	0.2	0.5	0.2	0.7	0.2	0	0.5	0.7	0.2	1	2.9	3.3	2.1	2.4	1.2	1	0.5	1.4	1.2	7.4	0.2	0.2	0.2	1.9	1.7	2.4	1.7	1	1.2	4.3	5.7		0	0	1.9	2.6
Atropa belladonna (Flower bud petals)	3.4	0.4	0.4	0	2.6	2.3	1.1	1.9	2.3	0.4	1.5	0	1.1	1.1	0.4	0.4	1.1	0.8	0	1.1	0.4	1.9	2.3	3	4.2	2.6	3.8	1.1	1.9	0.8	1.1	2.3	6	0.8	1.1	0.8	4.2	3.4	4.5	4.5	4.2	7.5	1.9	2.3		0.4	0	4.9	4.2
Atropa belladonna (Young leaf)	12.3	1.2	0	1.2	4.9	8.6	4.9	4.9	3.7	2.5	2.5	0	2.5	3.7	2.5	0	2.5	1.2	0	1.2	2.5	2.5	6.2	7.4	13.6	9.9	8.6	2.5	4.9	2.5	4.9	13.6	30.9	1.2	1.2	1.2	9.9	9.9	8.6	12.3	3.7	6.2	9.9	7.4		0	0	8.6	2.5
Hyoscyamus niger (Calyx)	1.4	0.2	0.4	0	1.6	2	0.4	1	0.6	0.8	0.2	0	0.4	0.2	0.2	0.4	0.8	0.8	0.2	0.4	0.2	0.8	1	1.2	2	1.4	1.2	0.4	0.4	0.8	0.4	1.6	2.6	1	0.6	0.6	2	1.6	1.2	2	0.8	2.4	2.2	1.6		0	0	1.6	4.6
Hyoscyamus niger (Stem)	0.4	0	0.4	0.4	1.3	0.8	0.4	0.6	0.4	0	0.6	0	0.8	1.3	0	0.2	0.2	0.6	0.2	0.2	0.4	0.8	0.8	0.8	2.8	1.3	1.3	0.4	0.6	0.6	0.4	0.6	1.1	0.8	0.8	0.6	1.3	1.5	1.7	1.1	1.1	0.4	2.8	2.8		0	0.2	1.1	5.3
Hyoscyamus niger (Young leaf)	1.1	0.4	0.2	0.2	2.1	0.9	0.5	1.6	1.2	0.4	0	0.2	0.2	0.9	0.2	0.4	0.5	0.5	0.2	0.7	0	0.4	0.7	1.2	1.6	1.2	0.7	0.2	0.5	0.5	0.2	1.6	2.1	0.5	0.7	0.7	1.4	1.6	0.9	1.4	0.2	0.9	1.2	1.1		0.2	0	1.1	4.2
Nicotiana alata white (Flower bud)	0	0.9	1.6	1.4	0	0	0.5	1.9	2.1	0.2	0.5	0.2	0.7	0.5	0.2	0.5	0.9	0.7	0.7	1.6	0.2	0.7	0.2	0.9	0.7	0.2	0.2	1.4	0.2	0.5	0	0	1.2	0.2	4.9	6.7	1.2	0.7	0.7	0.2	0.9	0.7	0.2	0.2		1.6	1.2	1.4	3.5
Nicotiana alata white (Leaf)	0.4	1.1	1.7	1.9	0	0	0.7	2.2	1.1	0.2	0.6	0	0.2	0.6	0.2	0.6	1.7	0.6	0.4	0.4	0	1.1	1.7	0.7	0.9	1.1	0.9	0.6	0.7	0.2	0	0.2	1.3	0.6	3.2	5.8	0.9	0.9	0.9	0.7	0.7	0.4	0.2	0.4		1.5	2.2	1.1	2.4
Nicotiana alata white (Stem)	0.3	1.3	1.6	1.6	0.5	0	0.3	1.3	1	0.3	1.6	0.5	0.3	0.3	0	0.3	1	0.8	1.3	1	0	0.5	1	0.8	0.3	0.3	1	0.5	0	0.3	0	0.3	0.8	0.5	1.8	2.8	0.3	0.5	0.8	0.8	0.5	0.5	0.5	0.3		2.6	1.8	0.8	2.1
Nicotiana alata yellow (Flower bud)	0	1.3	1.3	0.9	0.2	0	0.7	0.9	0.7	0	0.2	0.4	0.2	0.4	0	0.2	0.9	0.9	0.7	0.7	0.4	0.7	0.9	0.5	0.5	0.2	0.7	1.1	0.4	0.2	0	0	0	0.4	1.8	3.4	0.5	0.5	0.2	0.4	0.7	0.4	0.5	0.7		1.4	1.3	0.9	2.3
Nicotiana alata yellow (Leaf)	0	0	0.3	0.2	0	0	0	0.2	0	0	0.2	0	0.3	0.2	0	0.5	0.3	0.3	0.5	0.5	0.2	0.2	0.8	0.2	0	0	0.2	0.6	0	0.2	0	0	0	0.2	0.3	0.6	0	0	0.2	0.3	0	0.2	0.3	0.2		0.8	0.3	0.2	1.1
Nicotiana alata yellow (Stem)	0.2	0.3	1	1.5	0.7	0.3	0.5	2.5	2	0.2	0.7	0.3	0.2	0.2	0.5	0.5	1.8	0.5	0.3	0.2	0	0.7	0.2	0.5	0.2	0.5	0.3	0.7	0.2	0	0	0.2	1	0.2	1	0.8	0.7	1.7	0.5	0.5	0.2	0.5	0	0.3		1.7	1.5	0.7	1.7
Nicotiana sp. (Petiole)	6.4	3.8	2.6	2.6	5.1	6.4	3.8	7.7	7.7	2.6	2.6	0	7.7	12.8	0	0	5.1	3.8	3.8	1.3	3.8	0	5.1	5.1	17.9	6.4	7.7	6.4	12.8	0	0	5.1	10.3	2.6	2.6	2.6	9	10.3	9	6.4	12.8	2.6	7.7	6.4		0	0	10.3	2.6
Nicotiana sp. (Young leaf)	11.6	2.3	3.5	0	7	7	2.3	5.8	9.3	3.5	2.3	0	3.5	9.3	3.5	2.3	4.7	2.3	3.5	1.2	1.2	3.5	3.5	10.5	30.2	14	9.3	3.5	11.6	0	3.5	12.8	19.8	1.2	2.3	1.2	10.5	11.6	9.3	15.1	5.8	9.3	11.6	11.6		3.5	1.2	12.8	4.7
Salpiglossis sinuata (Fruit with calyx)	0.2	0.5	0.7	0.2	0	0.4	0.2	0	0	0	0.2	0	0.7	0	0.2	0.2	0.5	0.2	0.2	0.2	0.7	0.2	0.5	0.5	0.4	0.2	1.2	1.2	0.4	0.4	0.4	0	0.5	0	0.7	0.2	1.4	0.7	1.1	0.9	1.1	1.8	0.4	0.5		0.2	0.4	0.7	1.2
Salpiglossis sinuata (Old leaf)	0.4	0.1	0.2	0.1	0.8	0.4	0.4	0.4	0.3	0.2	0	0	0.2	0.2	0.2	0.1	0.3	0.3	0	0.1	0	0.4	0.7	0.6	0.7	0.4	0.8	0	0.3	0.7	0.6	0.8	1.1	0	0.3	0.1	0.8	0.9	0.8	0.9	1.2	1.5	0.4	0.1		0.1	0	1.1	2.4
Salpiglossis sinuata (Petiole)	0.8	0.3	0.2	0.3	0.7	0.7	0.5	1	0.8	0.3	0.2	0	0.7	0.3	0.2	0	0.8	0.3	0.2	0.3	0	0.7	0.7	0.8	1	1.2	1.2	0.5	0.5	0.5	0.5	1.3	1.6	0	0.5	0.3	2.1	2.5	1.8	2	1.3	1.5	1	0.2		0	0	2	1.2
Salpiglossis sinuata (Young leaf)	1.1	0.4	0.2	0.2	0.9	0.9	0.9	1.1	0.6	0.6	0.6	0	0.9	0.7	0.4	0	0.6	0.7	0.2	0.6	0.2	1.1	0.9	0.9	1.8	1.3	1.1	0.6	0.7	0.6	0.2	1.3	2	0.4	0.9	0.9	1.8	2.6	1.7	2	1.5	2.4	0.9	0.6		0.2	0	2.4	1.7
[truncated: 25 more columns]
