# Supplementary material for: Evolutionary routes to biochemical innovation revealed by integrative analysis of a plant-defense related specialized metabolic pathway
Source: eLife. 2017 Aug 30;6:e28468. doi: 10.7554/eLife.28468 (PMC5595436; doi:10.7554/eLife.28468)
Supplement: Figure 3—source data 1. — Data was used to make Figure 3B. [file elife-28468-fig3-data1.xlsx]

## Sheet: MAIN
		Figure 3-Source Data 1	Raw and processed values obtained through qPCR. Data was used to make Fig. 3B

## Sheet: SourceData1
Well Position	Number	Ct	Average Ct	cDNA sample	Primers	Melting Curve
A1	1	21.2111	21.3189	Uninoc-1	c55490_g2	n
B1	1	21.3495				n
C1	1	21.3962				n
D1	1	24.8318	24.9212	Uninoc-1	c40590_g3	y
E1	1	24.5272
F1	1	25.4046
G1	1	27.1795	27.353	Uninoc-1	c40486	y
H1	1	27.2973
I1	1	27.5823
J1	1	27.9938	28.0884	Uninoc-1	c49208	y
K1	1	28.1139
L1	1	28.1574
M1	1	26.3803	26.4526	Uninoc-1	c36223	y
N1	1	26.5698
O1	1	26.4079
A2	2	27.2587	27.5931	Uninoc-1	c48744	n
B2	2	27.1312
C2	2	28.3894
D2	2	19.4291	18.9258	TRV2-Lic-1	c55490_g2
E2	2	18.7094
F2	2	18.639
G2	2	21.925	21.9375	TRV2-Lic-1	c40590_g3
H2	2	21.9775
I2	2	21.9101
J2	2	25.9584	26.0154	TRV2-Lic-1	c40486
K2	2	25.8745
L2	2	26.2134
M2	2	25.7793	25.9137	TRV2-Lic-1	c49208
N2	2	25.8932
O2	2	26.0685
A3	3	24.9348	24.9299	TRV2-Lic-1	c36223
B3	3	24.851
C3	3	25.0039
D3	3	25.2013	25.2641	TRV2-Lic-1	c48744
E3	3	25.4101
F3	3	25.181
G3	3	18.4079	18.5069	TRV2-Lic-2	c55490_g2
H3	3	18.6653
I3	3	18.4474
J3	3	20.4883	20.6227	TRV2-Lic-2	c40590_g3
K3	3	20.9526
L3	3	20.4271
M3	3	24.4397	24.4102	TRV2-Lic-2	c40486
N3	3	24.3119
O3	3	24.4788
A4	4	25.0919	25.042	TRV2-Lic-2	c49208
B4	4	24.9661
C4	4	25.068
D4	4	22.9928	22.9018	TRV2-Lic-2	c36223
E4	4	22.7354
F4	4	22.9773
G4	4	23.3697	23.5348	TRV2-Lic-2	c48744
H4	4	23.3978
I4	4	23.8368
J4	4	27.3262	27.4217	ASAT2-1-1	c49208
K4	4	27.4663
L4	4	27.4726
M4	4	19.748	19.8079	ASAT2-1-1	c55490_g2
N4	4	19.8566
O4	4	19.8191
A5	5	22.3217	22.3687	ASAT2-1-1	c40590_g3
B5	5	22.4425
C5	5	22.3418
D5	5	27.6582	27.6828	ASAT2-1-2	c49208
E5	5	27.6118
F5	5	27.7786
G5	5	18.3339	18.6028	ASAT2-1-2	c55490_g2
H5	5	19.0633
I5	5	18.4113
J5	5	22.0034	21.2586	ASAT2-1-2	c40590_g3
K5	5	20.8858
L5	5	20.8865
M5	5	27.8133	27.8014	ASAT2-2-1	c49208
N5	5	27.7294
O5	5	27.8616
A6	6	19.595	20.5793	ASAT2-2-1	c55490_g2
B6	6	19.6343
C6	6	22.5086
D6	6	22.6603	22.6067	ASAT2-2-1	c40590_g3
E6	6	22.6301
F6	6	22.5297
G6	6	27.8869	27.768	ASAT2-2-6	c49208
H6	6	27.6328
I6	6	27.7842
J6	6	23.4597	20.408	ASAT2-2-6	c55490_g2
K6	6	18.8256
L6	6	18.9385
M6	6	21.9073	22.2805	ASAT2-2-6	c40590_g3
N6	6	22.997
O6	6	21.9372
A7	7	27.5789	27.0556	ASAT3-2-1	c36223
B7	7	26.8711
C7	7	26.7169
D7	7	18.8481	18.6772	ASAT3-2-1	c55490_g2
E7	7	18.7209
F7	7	18.4626
G7	7	21.6576	21.5513	ASAT3-2-1	c40590_g3
H7	7	21.6867
I7	7	21.3097
J7	7	27.155	27.2591	ASAT3-2-2	c36223
K7	7	27.3616
L7	7	27.2606
M7	7	20.8534	21.0156	ASAT3-2-2	c55490_g2
N7	7	21.0101
O7	7	21.1834
A8	8	24.7129	24.7447	ASAT3-2-2	c40590_g3
B8	8	24.7568
C8	8	24.7645
D8	8	26.3129	26.3311	ASAT5-2-6	c48744_g2
E8	8	26.4155
F8	8	26.2649
G8	8	18.7805	18.5824	ASAT5-2-6	c55490_g2
H8	8	18.6444
I8	8	18.3222
J8	8	22.3723	22.3724	ASAT5-2-6	c40590_g3
K8	8	22.426
L8	8	22.3189
M8	8	26.9937	27.0144	ASAT5-2-7	c48744_g2
N8	8	27.0931
O8	8	26.9566
A9	9	19.4087	20.0391	ASAT5-2-7	c55490_g2
B9	9	19.3802
C9	9	21.3284
D9	9	22.8469	22.8649	ASAT5-2-7	c40590_g3
E9	9	22.8661
F9	9	22.8817
G9	9	19.0916	18.9949	TRV2-6	c55490_g2
H9	9	18.9523
I9	9	18.9408
J9	9	20.9811	20.9422	TRV2-6	c40590_g3
K9	9	20.9118
L9	9	20.9339
M9	9	25.6821	25.7532	TRV2-6	c40486
N9	9	25.8465
O9	9	25.731
A10	10	25.9651	25.9305	TRV2-6	c49208
B10	10	25.9399
C10	10	25.8863
D10	10	24.2335	24.3086	TRV2-6	c36223
E10	10	24.478
F10	10	24.2141
G10	10	25.2891	24.8355	TRV2-6	c48744
H10	10	24.6638
I10	10	24.5535
J10	10	18.4605	18.5271	Ssvigs1-uninoc-1	c55490_g2
K10	10	18.5316
L10	10	18.5891
M10	10	21.6832	21.7329	Ssvigs1-uninoc-1	c40590_g3
N10	10	21.7696
O10	10	21.7459
A11	11	25.7966	25.6777	Ssvigs1-uninoc-1	c40486
B11	11	25.6031
C11	11	25.6334
D11	11	25.4929	25.3767	Ssvigs1-uninoc-1	c49208
E11	11	25.395
F11	11	25.2421
G11	11	24.4572	24.3903	Ssvigs1-uninoc-1	c36223
H11	11	24.2674
I11	11	24.4462
J11	11	25.6927	25.7921	Ssvigs1-uninoc-1	c48744
K11	11	25.8046
L11	11	25.8789
M11	11	18.7647	18.8238	Ssvigs1-uninoc-2	c55490_g2
N11	11	18.8433
O11	11	18.8635
A12	12	21.4299	21.4	Ssvigs1-uninoc-2	c40590_g3
B12	12	21.3506
C12	12	21.4196
D12	12	25.5819	25.6384	Ssvigs1-uninoc-2	c40486
E12	12	25.742
F12	12	25.5914
G12	12	24.9504	25.0093	Ssvigs1-uninoc-2	c49208
H12	12	25.0926
I12	12	24.9849
J12	12	23.8835	23.9129	Ssvigs1-uninoc-2	c36223
K12	12	23.9526
L12	12	23.9026
M12	12	25.2705	25.2792	Ssvigs1-uninoc-2	c48744
N12	12	25.2684
O12	12	25.2986
A13	13	18.811	18.8022	Ssvigs1-empty-3	c55490_g2
B13	13	18.8908
C13	13	18.7048
D13	13	20.9065	20.929	Ssvigs1-empty-3	c40590_g3
E13	13	20.9076
F13	13	20.973
G13	13	26.7634	26.9833	Ssvigs1-empty-3	c40486
H13	13	27.4062
I13	13	26.7804
J13	13	26.6614	26.5821	Ssvigs1-empty-3	c49208
K13	13	26.535
L13	13	26.5499
M13	13	25.2273	25.3384	Ssvigs1-empty-3	c36223
N13	13	25.302
O13	13	25.4858
A14	14	25.5173	25.4634	Ssvigs1-empty-3	c48744
B14	14	25.5636
C14	14	25.3092
D14	14	18.6682	18.5285	Ssvigs1-empty-2	c55490_g2
E14	14	18.5529
F14	14	18.3645
G14	14	20.3318	20.229	Ssvigs1-empty-2	c40590_g3
H14	14	20.1372
I14	14	20.2181
J14	14	26.4746	26.5397	Ssvigs1-empty-2	c40486
K14	14	26.6452
L14	14	26.4994
M14	14	26.2497	26.342	Ssvigs1-empty-2	c49208
N14	14	26.4076
O14	14	26.3688
A15	15	25.1101	25.2409	Ssvigs1-empty-2	c36223
B15	15	25.3674
C15	15	25.2452
D15	15	25.1431	25.0505	Ssvigs1-empty-2	c48744
E15	15	25.0059
F15	15	25.0026
G15	15	26.0225	26.0572	Ssvigs1-asat1-1-1	c40486_g1
H15	15	26.3189
I15	15	25.8302
J15	15	18.5513	18.5658	Ssvigs1-asat1-1-1	c55490_g2
K15	15	18.5366
L15	15	18.6095
M15	15	20.5255	20.7154	Ssvigs1-asat1-1-1	c40590_g3
N15	15	20.5353
O15	15	21.0854
A16	16	26.3329	26.2463	Ssvigs1-asat1-1-2	c40486_g1
B16	16	26.1431
C16	16	26.2629
D16	16	18.8597	18.6762	Ssvigs1-asat1-1-2	c55490_g2
E16	16	18.6415
F16	16	18.5274
G16	16	20.8928	20.882	Ssvigs1-asat1-1-2	c40590_g3
H16	16	20.8859
I16	16	20.8673
J16	16	25.2726	25.2739	Ssvigs1-asat2-1-1	c49208_g1
K16	16	25.2626
L16	16	25.2866
M16	16	18.7799	18.8392	Ssvigs1-asat2-1-1	c55490_g2
N16	16	18.8264
O16	16	18.9112
A17	17	20.5492	20.6241	Ssvigs1-asat2-1-1	c40590_g3
B17	17	20.5017
C17	17	20.8214
D17	17	25.9529	25.8085	Ssvigs1-asat2-1-2	c49208_g1
E17	17	25.627
F17	17	25.8456
G17	17	18.5106	18.4294	Ssvigs1-asat2-1-2	c55490_g2
H17	17	18.2097
I17	17	18.568
J17	17	20.8124	20.7679	Ssvigs1-asat2-1-2	c40590_g3
K17	17	20.7558
L17	17	20.7356
M17	17	26.4412	26.4983	Octvigs-paasat1-1-1	c40486_g1
N17	17	26.5873
O17	17	26.4663
A18	18	19.4998	19.4948	Octvigs-paasat1-1-1	c55490_g2
B18	18	19.5687
C18	18	19.4159
D18	18	21.1931	21.14	Octvigs-paasat1-1-1	c40590_g3
E18	18	20.9973
F18	18	21.2296
G18	18	27.3097	27.3983	Octvigs-paasat1-1-2(3)	c40486_g1
H18	18	27.5579
I18	18	27.3274
J18	18	18.6569	18.7835	Octvigs-paasat1-1-2(3)	c55490_g2
K18	18	18.7928
L18	18	18.9008
M18	18	22.7514	22.749	Octvigs-paasat1-1-2(3)	c40590_g3
N18	18	22.7347
O18	18	22.761
A19	19	26.4708	26.6017	Octvigs_paasat1-1-2(4)	c40486_g1
B19	19	26.5628
C19	19	26.7715
D19	19	19.7143	19.554	Octvigs_paasat1-1-2(4)	c55490_g2
E19	19	19.532
F19	19	19.4158
G19	19	21.8805	21.9772	Octvigs_paasat1-1-2(4)	c40590_g3
H19	19	22.1055
I19	19	21.9456
J19	19	18.6547	18.6635	Octvigs-empty-1	c55490_g2
K19	19	18.5526
L19	19	18.7831
M19	19	21.9585	22.0368	Octvigs-empty-1	c40590_g3
N19	19	22.0885
O19	19	22.0633
A20	20	27.0029	26.9978	Octvigs-empty-1	c40486
B20	20	26.9907
C20	20	26.9997
D20	20	27.252	27.2423	Octvigs-empty-1	c49208
E20	20	27.3461
F20	20	27.1288
G20	20	25.9948	26.165	Octvigs-empty-1	c36223
H20	20	26.1837
I20	20	26.3166
J20	20	26.4231	26.455	Octvigs-empty-1	c48744
K20	20	26.2987
L20	20	26.6433
M20	20	18.8156	19.3685	Octvigs-empty-1	c55490_g2
N20	20	18.9914
O20	20	20.2987
A21	21	21.7817	21.8106	Octvigs-empty-2	c40590_g3
B21	21	21.8418
C21	21	21.8084
D21	21	25.9237	25.8997	Octvigs-empty-2	c40486
E21	21	25.9163
F21	21	25.8591
G21	21	26.1426	26.0703	Octvigs-empty-2	c49208
H21	21	26.0869
I21	21	25.9816
J21	21	25.0997	25.0583	Octvigs-empty-2	c36223
K21	21	25.0685
L21	21	25.0068
M21	21	25.4212	25.3509	Octvigs-empty-2	c48744
N21	21	25.3322
O21	21	25.2993
A22	22	20.3027	20.2875	Octvigs-uninoc-1	c55490_g2
B22	22	20.2773
C22	22	20.2826
D22	22	22.7309	22.7024	Octvigs-uninoc-1	c40590_g3
E22	22	22.766
F22	22	22.6104
G22	22	26.5895	26.4857	Octvigs-uninoc-1	c40486
H22	22	26.393
I22	22	26.4748
J22	22	27.1855	27.1668	Octvigs-uninoc-1	c49208
K22	22	26.9989
L22	22	27.3161
M22	22	25.6308	25.7904	Octvigs-uninoc-1	c36223
N22	22	25.8178
O22	22	25.9227
A23	23	25.6411	25.6162	Octvigs-uninoc-1	c48744
B23	23	25.6213
C23	23	25.5861
D23	23	19.0956	22.219	Octvigs-uninoc-2	c55490_g2
E23	23	23.0783
F23	23	24.4831
G23	23	21.7931	23.1038	Octvigs-uninoc-2	c40590_g3
H23	23	21.7312
I23	23	25.7872
J23	23	25.9676	25.9066	Octvigs-uninoc-2	c40486
K23	23	25.8987
L23	23	25.8536
M23	23	26.1244	26.0631	Octvigs-uninoc-2	c49208
N23	23	25.9363
O23	23	26.1287
A24	24	24.86	24.814	Octvigs-uninoc-2	c36223
B24	24	24.8135
C24	24	24.7684
D24	24	25.3366	25.4668	Octvigs-uninoc-2	c48744
E24	24	25.5244
F24	24	25.5393
