# Supplementary material for: Evolutionary routes to biochemical innovation revealed by integrative analysis of a plant-defense related specialized metabolic pathway
Source: eLife. 2017 Aug 30;6:e28468. doi: 10.7554/eLife.28468 (PMC5595436; doi:10.7554/eLife.28468)
Supplement: Figure 3—source data 2. — Individual worksheets describe data obtained from independent experiments. This data was used to make Figures 3D, F, 4B and D. [file elife-28468-fig3-data2.xlsx]

## Sheet: MAIN
		Figure 3-Source Data 2	Normalized peak areas calculated for VIGS experiments. Individual worksheets describe data obtained from independent experiments.

## Sheet: ASAT12-repl1
GroupID-PlantID	IS	1_611.26_1.82	2_639.28_1.98	3_625.27_1.91	4_639.28_1.82	7_625.27_2.02	8_667.30_2.02	9_653.29_2.08	10_681.31_2.18	11_667.3_2.25	13_681.31_2.44	14_667.30_2.48	15_723.34_2.46	16_709.33_2.55	18_681.31_2.72	19_723.34_2.80	21_709.33_2.92	24_737.35_3.05	25_723.34_3.09	27_723.34_3.22	31_751.36_3.36	32_737.35_3.42	33_765.37_3.68	34_751.36_3.74	36_793.39_3.82	37_779.38_3.94	40_765.37_4.08	41_807.4_4.16	44_793.39_4.26	47_821.41_4.42	48_807.40_4.57	50_835.42_4.69	51_849.43_4.97	52_863.44_5.19
Uninoculated-1	0	0.18	0.12	0.55	0	0.55	0	0.71	0.04	0.68	4.09	3.2	0	2.81	2.29	12.32	45.41	29.46	3.88	54.32	28.49	45.46	19.74	41.05	2.22	26.89	23.4	3.6	21.27	8.49	7.38	7.83	1.34	0.03
Uninoculated-2	0	0.14	0.1	0.49	0	0.49	0.01	0.63	0.1	0.1	0.82	1.32	0	1.1	0.97	5.04	17.99	13.85	0.02	23.62	14.7	22.8	10.75	21.54	1.51	17.28	12.84	2.72	14.18	7.21	6.4	6.82	1.52	0.03
Uninoculated-3	0	0.2	0.14	0.5	0.01	0.5	0.01	0.65	0.05	1.19	4.25	2.16	0	3.68	1.28	9.69	28.44	17.55	0.06	33.36	15.76	27.66	12.49	24.48	2.21	18.94	13.48	3.47	13.81	7.55	5.05	5.97	0.99	0.01
Uninoculated-4	0	0.09	0.07	0.29	0.01	0.29	0.01	0.48	0.11	0.02	0.27	0.71	0	0.57	0.43	3.03	13.67	11.2	13.65	17.83	13.36	18.9	10.07	18.82	1.14	15.99	10.13	2.21	13.12	6.65	4.82	5.92	0.94	0.01
Uninoculated-5	0	0.13	0.09	0.43	0	0	0	0.67	0.05	0.13	1.52	1.72	0	1.45	1.29	8.92	39.6	29.62	0	50.86	34.52	47.95	22.2	46.75	2.31	31.06	25.02	4.26	25.75	10.55	8.28	9.08	1.58	0.02
TRV2-LIC-1	0	0.29	0.21	0.74	0.02	0	0.01	0.96	0.06	1.55	4.76	3.59	0	3.54	1.98	8.34	24.87	15.37	0	29.85	12.91	24.42	10.91	21.62	1.65	16.53	12.49	3	12.98	2.67	5.76	6.15	1.22	0.02
TRV2-LIC-2	0	0.04	0.04	0.29	0	0	0	0.55	0.02	0.08	0.83	1.8	0	0.79	1.19	5.04	25.35	19.66	0	29.94	24.48	31.16	14.14	32.51	1.15	21.9	17.83	2.6	19.62	2.13	7.37	7.46	1.32	0.01
TRV2-LIC-3	0	0.04	0.05	0.23	0	0	0.01	0.47	0.01	0.29	2.86	4.32	0	1.76	3.5	11.29	33.89	25.71	0	44.31	26.83	36.1	17.54	33.7	1.51	22.35	20.9	3.06	18.88	2.63	7.71	7.13	1.44	0.02
TRV2-LIC-4	0	0	0.01	0.01	0.03	0.01	0	0.07	0.08	0	0.01	0.13	0	0.11	0.03	0.76	4.54	5.87	2.18	1.35	9.89	12.28	8.65	12.56	0.26	12.66	1.98	0.56	7.12	2.34	0.43	0.98	0.02	0
TRV2-LIC-5	0	0.04	0.04	0.22	0.01	0	0	0.41	0.05	0.02	0.52	1.52	0	0.65	0.88	4.79	22.86	18.7	0	27.94	23.6	27.74	17.42	27.6	1.07	20.65	14.1	2.05	16.49	6.57	4.27	5.44	0.64	0
TRV2-LIC-6	0	0	0	0	0	0	0	0	0	0	0	0	0	0	0	0.01	0.17	0.2	0.07	0.03	0.58	0.54	0.45	0.69	0	0.59	0.05	0	0.23	0.04	0	0.01	0	0
TRV2-LIC-7	0	0.01	0.01	0.06	0.03	0	0	0.15	0.05	0	0.03	0.33	0	0.15	0.15	1.08	8.16	8.51	4.74	4.74	15.1	15.36	10.89	16.98	0.47	14.96	5.74	0.88	11.09	3.37	1.51	2.38	0.15	0
TRV2-LIC-8	0	0.19	0.11	0.54	0.01	0.54	0.01	0.65	0.03	2.24	6.47	3.51	0	5.65	1.84	13.6	37.92	26.05	0.06	47.94	23.13	38.92	16.45	33.75	2.47	23.77	18.56	3.48	18.1	8.25	6.08	6.78	1.1	0.02
TRV2-LIC-9	0	0.08	0.07	0.6	0	0	0.01	0.81	0.02	0.24	2.12	2.91	0	1.95	2.17	9.95	36.77	27.53	0	46.17	29.38	42.37	18.04	40.6	2.01	26.44	23.97	4.24	23.85	3.37	9.74	10.12	2.07	0.04
ASAT1-1-1	0	0.07	0.07	0.28	0.07	0.28	0.01	0.58	0.07	0.05	0.57	2.02	0	0.63	1.81	4.58	17.06	12.61	1.36	21.56	13.94	20.22	10.02	19.8	0.89	15.76	12.74	2.13	13.41	1.84	6.41	6.08	1.46	0.04
ASAT1-1-2	0	0	0	0.01	0	0.01	0	0.05	0.01	0.09	0.57	1.11	0.07	1.37	0.35	5.97	10.88	13.13	0	9.03	13.22	8.94	8.54	8.94	0.25	7.97	2.36	0.46	5.31	1.7	0.47	0.96	0.04	0
ASAT1-1-3	0	0	0	0	0.04	0	0	0	0	0	0	0	0	0.01	0	0.07	0.61	0.92	0.31	0.31	2.24	1.86	1.31	2.33	0.03	2.28	0.26	0.03	1.15	0.31	0.04	0.11	0	0
ASAT1-1-4	0	0	0	0.01	0.08	0.01	0	0.03	0	0.13	0.97	1.66	0.02	1.53	0.56	7.52	16.26	17.44	0	14	19.55	11.17	11.23	11.21	0.23	7.94	2.29	0.36	5.34	1.29	0.33	0.84	0.03	0
ASAT1-1-5	0	0.05	0.05	0.17	0	0.17	0.01	0.44	0.15	0.01	0.18	0.86	0	0.44	0.39	2.81	18.1	16.17	0	21.51	22.27	28.03	18.54	28.88	0.96	26.2	11.42	1.67	18.93	7.66	3.55	5.54	0.43	0
ASAT1-1-6	0	0.08	0.08	0.32	0.01	0.32	0.01	0.56	0.05	0.13	1.1	1.78	0	1.19	1.47	5.75	18.98	14.6	1.31	22.63	14.16	20.92	9.86	20.07	1.24	16.15	12.54	2.78	13.84	2.2	6.58	6.88	1.76	0.04
ASAT1-1-7	0	0.02	0.02	0.1	0.01	0.1	0	0.27	0.03	0.01	0.31	1.13	0	0.37	0.85	3.05	13.46	11.43	0.05	16.38	13.96	16.47	10.09	17.02	0.62	13.71	9.38	1.47	11.35	4.34	4.18	4.26	0.71	0.01
ASAT1-2-1	0	0.05	0.05	0.29	0	0	0.01	0.53	0.09	0.02	0.37	1.06	0	0.51	0.75	3.64	17.11	13.33	0	20.91	17.08	23.09	11.75	22.9	1.06	19.04	13.27	2.35	15.97	7.15	6.35	6.89	1.22	0.02
ASAT1-2-2	0	0	0	0.01	0	0.01	0	0.01	0	0	0.95	0.06	0	0.25	0.43	11.77	6.64	3.15	0.03	18.87	15.41	12.21	20.47	8.87	0.06	3.94	5.59	0.27	2.88	0.21	1.08	0.51	0.15	0.01
ASAT1-2-3	0	0.01	0	0.17	0.01	0.17	0	0.13	0	0.04	1.98	0.95	0	0.7	2.56	9.92	18.86	10.59	0.05	28.15	20.45	24	17.8	18.23	0.5	10.07	13.21	1.1	9.68	0.94	4.7	2.87	0.81	0.11
ASAT1-2-4	0	0.02	0.02	0.11	0.01	0.11	0	0.31	0.03	0.02	0.38	1.72	0	0.57	1.24	4.29	21.66	19.11	0.06	26.48	25.87	27.29	18.27	28.98	0.85	21.46	14.71	1.85	18.13	5.51	5.26	5.31	0.73	0
ASAT1-2-5	0	0.01	0.01	0.18	0.01	0.18	0.01	0.19	0.01	0.02	0.87	0.89	0	0.53	1.66	5.44	10.61	7.23	0.4	14.35	10.31	14	8.75	11.2	0.43	9.06	7.53	0.93	7.35	1.27	3.83	2.99	0.8	0.08
ASAT1-2-6	0	0	0	0.06	0	0.06	0	0.13	0	0.11	2.11	2.23	0	1.48	2.35	13.6	31.7	24.25	1.11	40.03	32.3	33.51	24.56	30.11	0.62	16.1	16.31	1.02	14.42	3.16	4.03	3.4	0.57	0.01
ASAT1-2-7	0	0.01	0.01	0.1	0	0	0.01	0.19	0.02	0.96	4.37	1.96	0.02	7.27	1.48	21.14	39.41	33.46	0	47.47	32.28	39.06	25	31.72	1.7	20.01	16.4	1.68	13.81	4.94	3.15	3.44	0.43	0.01
ASAT2-1-1	0	0	0	0.01	0.01	0.03	0	0.04	0	0.44	3.54	2.64	0	2.47	1.12	13.94	28.81	26.96	0.07	23.09	30.28	10.63	17.55	12.12	0.15	2.84	2.26	0.2	2.95	0.46	0.26	0.46	0.02	0
ASAT2-1-2	0	0	0	0.01	0	0.06	0	0.09	0.01	2.15	7.81	3.67	0.02	5.77	1.29	14.58	24.34	22.18	0.09	20.82	22.86	10.44	13.24	9.82	0.28	2.26	2.09	0.24	1.9	0.4	0.19	0.3	0.01	0
ASAT2-1-3	0	0	0	0	0.12	0.04	0	0.02	0	0.64	2.8	2.48	0.02	2.5	0.9	8.74	17.13	16.33	0.12	14.61	18.17	8.04	10.72	7.95	0.12	2.49	1.35	0.14	1.87	0.36	0.12	0.27	0.01	0
ASAT2-1-4	0	0	0	0	0.01	0.06	0	0.08	0	2.44	6.65	3.01	0.01	4.06	1	10.78	20.77	17.98	0	17.21	19.66	8.27	11.12	8.15	0.11	1.49	1.62	0.1	1.4	0.07	0.12	0.18	0.01	0
ASAT2-1-5	0	0	0	0	0	0.03	0	0.04	0	1.66	5.91	2.44	0.01	4.65	0.72	14.12	26.38	24.89	1	18.89	27.13	7.81	15.05	8.35	0.1	1.48	1.33	0.09	1.21	0.08	0.09	0.16	0	0

## Sheet: ASAT1-repl2
GroupID-PlantID	IS	x1_1237.59_4.09_0.2	1_695.23_7.70	2_709.24_7.56	3_709.24_8.22	4_723.25_7.94	5_723.25_8.66	6_723.25_8.80	7_737.26_8.52	8_737.26_9.24	9_751.27_9.15	10_751.27_9.88	11_765.28_9.71	12_779.29_10.35	13_793.30_10.97	14_807.31_10.73	15_807.31_11.09	16_807.31_11.60	17_821.32_11.24	18_835.33_11.88	19_849.34_12.44
Uninoculated-1	0	0	0	2.35	28.82	5.37	9.15	37.35	43.08	91.42	57.45	96.29	40.29	97.18	61.53	8.2	2.45	5.42	23.37	12.57	0.84
Uninoculated-2	0	0	0	4.39	47.68	8.86	43.37	57.74	70.6	147.65	75.87	140.78	65.34	176.65	100.74	14.28	5.06	6.52	48.54	21.45	1.1
Uninoculated-3	0	0	0	6.89	82.41	16.85	93.99	93.99	99.44	189.74	126.89	196.32	93.86	218.75	138.85	24.22	7.29	15.64	72.23	37.08	2.92
Uninoculated-4	0	0	0	2.82	21.69	3.43	0	10.12	10.89	61.31	28.97	52.32	38.39	72.93	37.16	6.87	1.88	2.57	21.68	7.91	0.4
Uninoculated-5	0	0	0	5.68	41.46	7.97	50.14	0	47.14	115.84	35.77	91.13	62.72	131	57.68	11.23	2.32	3.79	35.76	12.37	0.53
TRV2-1	0	0	0	6.66	65.58	12.57	3.52	36.47	87	159.63	72.99	119.61	98.69	184.11	74.85	14.83	3.68	2.42	47.53	12.96	0.47
TRV2-2	0	0	0	4.03	37.16	6.11	42.4	42.32	48.15	110.46	43.37	87.84	60.6	123.88	60.36	9.54	2.52	3.8	29.48	10.04	0.47
TRV2-3	0	0	0	4.15	45.51	9.53	26.93	53.4	63.56	123.25	68.02	115	64.16	146.56	76.96	13.1	3.24	6.41	39.49	16.86	0.95
TRV2-4	0	0	0	5.83	69.87	12.97	9.5	83.08	94.44	213.47	88.73	171.68	101.91	218.88	101.04	20.95	5.72	6.46	63.79	22.75	0.96
TRV2-5	0	0	0	2.1	21.16	4.9	4.1	12.44	18.88	69.18	34.42	57.54	40.14	74.94	36.65	6.31	1.79	2.06	17.48	6.21	0.24
TRV2-6	0	0	0	3.72	36.35	6.87	45.9	45.81	49.83	111.9	52.44	105.98	51.45	109.93	55.73	7.17	1.84	3.15	20.89	7.64	0.36
TRV2-7	0	0	0	1.5	6.66	1.81	9.63	0	13.23	25.53	12.93	16.87	19.6	31.97	8.8	2.17	0.21	0.24	4.96	1.29	0.02
TRV2-8	0	0	0	2.74	21.43	5.81	17.53	33	35.86	93.5	40.99	69.14	53.34	90.12	33.67	6.4	0.66	1.47	15.04	4.73	0.15
TRV2-9	0	0	0	4.08	19.65	5.57	10.07	0	13.1	55.89	30.14	39.16	41.44	61	19.05	5.5	0.63	0.61	13.25	3.24	0.09
TRV2-10	0	0	0	4.34	18.88	4.61	30.09	32.17	37.94	72.66	28.03	41.5	51.86	62.91	16.99	5.25	0.4	0.39	10.94	2.57	0.03
ASAT1-1-1	0	0	0	2.77	26.36	5.85	16.24	16.24	15.86	59.01	35.81	54.56	41.53	68.95	30.65	6.6	0.99	2.15	17.66	5.79	0.28
ASAT1-1-2	0	0	0	1.8	7.88	2.45	11.11	11.1	16.08	35.47	16.73	26.17	21.72	40.33	12.39	2.23	0.42	0.39	6.49	1.92	0.06
ASAT1-1-3	0	0	0	2.01	12.25	5.16	19.64	19.64	8.38	51.36	24.98	29.93	39.68	45.52	11.92	1.59	0.21	0.26	7.85	1.8	0.01
ASAT1-1-4	0	0	0	2.34	4.66	4.54	16.67	16.67	9.58	29.16	9.96	10.19	35.68	22.28	3.96	1.17	0.04	0.16	4.07	0.49	0
ASAT1-1-5	0	0	0	4.36	21.67	7.77	11.9	24.48	17.53	77.21	43.26	60.38	67.62	69.46	22.01	3.26	0.5	0.75	13.92	3.91	0.1
ASAT1-1-6	0	0	0	2.03	17.98	5.26	27.24	27.21	12.7	70.26	18.56	36.41	41.58	45.77	9.5	1.63	0.24	0.23	9.04	1.74	0.01
ASAT1-1-7	0	0	0	1.46	39.37	7.6	28.64	28.64	47.05	92.3	97.35	120.86	48.89	94.23	71.98	1.95	1.66	10.13	12.95	13.9	1.63
ASAT1-1-8	0	0	0	4.14	28.72	6.58	21.63	21.85	19.61	78.44	25.26	63.23	54.31	83.15	30.32	3.6	0.79	1.08	17.85	5.15	0.15
ASAT1-1-9	0	0	0	1.97	21.08	5.14	26.63	26.75	33.37	71.79	51.94	78.85	36.76	72.69	38.41	5	0.67	2.16	13.19	5.6	0.29
ASAT1-1-10	0	0	0	6.09	137.74	0	0.32	167.42	134.47	230.32	150.56	272.58	81.3	160.05	141.98	20.84	4.34	30.09	51.08	39.73	6.17
ASAT1-1-11	0	0	0	3.08	17.64	3.65	27.65	28.31	31.04	76.17	32.14	66.52	42.2	74.63	33.46	5	0.94	1.85	12	4.11	0.19
ASAT1-1-12	0	0	0	1.29	3.91	2.13	6.34	7.07	1.74	12.66	0	7.15	0.01	12.84	3.44	0.56	0	0.07	2.73	0.51	0
ASAT1-1-13	0	0.04	0	0	1.86	0.07	2.34	3.14	0.89	6.9	0	3.03	6.3	6.45	1.35	0.36	0	0.02	1.13	0.16	0
ASAT1-1-14	0	0	0	0.37	1.2	0.55	1.76	1.76	3.46	4.91	3.95	3.31	5.13	7.6	2.24	0.26	0.03	0.07	1.38	0.34	0
ASAT1-2-1	0	0	0	0.38	6.24	2.94	0	10.04	8.83	20.86	31.83	31.42	38.92	29.42	21.52	1.51	0.36	4.07	4.39	3.01	0.63
ASAT1-2-2	0	0	0	0.01	2.02	1	0.07	7.18	1.76	3.45	13.03	12.51	20.49	6.21	7.47	0.33	0.05	2.33	0.86	1.08	0.34
ASAT1-2-3	0	0	0	1.64	28.15	0	3.26	30.4	34.38	71.64	63.06	81.21	0.04	83.96	55.07	6.15	1.45	5.48	17.46	10.73	0.81
ASAT1-2-4	0	0.03	0	0	0.03	0.03	0	2.65	0.61	0.09	0.03	0.04	0.02	0	0	0	1.29	0	0	0	0.2
ASAT1-2-5	0	0	0	2.6	0.15	0.17	2.4	12.29	2.3	0.15	0	0	0	0.12	0.03	0	5.76	0	0	5.31	0.31
ASAT1-2-6	0	0	0	0.03	0	0	0.26	0.22	0.02	2.74	8.77	6.61	0	3.87	4.42	0.19	0.19	1.43	0.67	0.61	0.18
ASAT1-2-7	0	0	0	0.09	4.12	0	0.04	17.04	3.77	4.62	34.35	23.93	41.49	8.24	19.01	1.01	0.15	6.53	1.65	2.73	1.03
ASAT1-2-8	0	0	0	0.24	1.33	0.43	0.92	0.92	2.63	5.55	4.18	5.56	5.55	5.98	2.96	0.23	0	0.33	1.01	0.44	0.04
ASAT1-2-9	0	0	0	0.06	2.67	1.71	0.81	7.92	2.73	6.55	16.29	11.99	30.63	9.87	7.28	0.25	0.06	1.97	1.24	0.95	0.23
ASAT1-2-10	0	0	0	0	0.32	0.05	0.31	0.7	0.26	2.27	2.34	2.88	3.82	3.15	1.62	0.01	0	0.15	0.33	0.1	0

## Sheet: ASAT235-repl1
GroupID-PlantID	x1_1237.59_4.99_0.2	1_611.27_5.95_0.2	2_625.27_6.58_0.4	4_639.28_6.05_0.4	5_639.28_7.00_0.4	7_653.28_6.70_0.4	8_653.28_7.70_0.6	9_667.29_7.55_0.6	10_681.29_8.5_0.6	11_681.29_11.1_0.6	12_695.3_9.4_0.6	13_695.3_10.55_0.5	14_695.3_10.70_0.2	15_709.3_11.45_0.8	16_723.31_11.10_0.4	17_723.31_12.25_0.8	19_737.31_11.80_0.5	20_737.31_13.00_0.6	21_751.32_12.80_0.6	22_751.32_13.90_0.6	23_765.32_13.80_0.8	24_779.33_14.8_0.8	25_793.33_15.2_0.8	26_807.34_14.80_0.4	27_807.34_16.00_0.5	29_821.34_15.48_0.6	30_835.35_16.20_0.6
UNINOCULATED-1	5.19	0.09	0.06	0.02	0.17	0.01	0.28	0.05	0.66	0.01	0.12	0.46	0.46	2.77	0.76	4.09	3.37	7.84	3.96	7.2	4.88	7.33	3.09	0.79	0.2	1.79	0.53
UNINOCULATED-2	8.08	0.57	1.92	0.07	0.75	0.5	2.82	0.31	1.24	3.69	1.53	16.75	15.18	89.21	20.47	111.17	87.2	137.62	137.54	157.79	69.37	88.61	72.73	0	13.98	21.21	15.53
UNINOCULATED-3	11.75	0.01	0.01	0.01	0.01	0.01	0.02	0.01	0.08	0.02	0.02	0.15	0.15	0.98	0.07	1.38	1.28	2.7	3.01	2.93	1.99	2.53	1.35	0.15	0.05	0.65	0.23
UNINOCULATED-4	2.28	0.05	0.12	0	0.07	0.02	0.25	0.04	0.32	0.1	0.17	1.37	1.37	6.4	1.99	8.94	10.29	16.37	18.8	19.56	13.19	19	11.7	1.97	1.46	3.88	2.04
UNINOCULATED-5	2.43	0	0	0	0.01	0	0.01	0	0.03	0.01	0.01	0.15	0.15	0.63	0.1	0.97	0.62	2.34	1.45	2.12	1.59	2.39	0.98	0.03	0.03	0.44	0.12
UNINOCULATED-6	11.72	0	0	0.03	0.01	0	0.02	0	0.1	0.03	0.02	0.12	0.12	0.96	0.14	1.32	1.18	3.32	2.57	3.88	1.94	3.01	1.73	0.1	0.11	0.63	0.24
UNINOCULATED-7	8.71	0.02	0.04	0	0.06	0.01	0.15	0.02	0.46	0.03	0.2	0.31	0.31	3.06	0.61	3.76	3.57	6.48	8.36	7.99	4.71	7.54	4.62	0.65	0.03	1.69	0.85
UNINOCULATED-8	5.74	0	0.01	0.01	0.02	0	0.04	0	0.04	0.01	0.03	0.18	0.18	1.22	0.06	1.85	1.85	3.87	3.74	4.92	2.91	4.13	2.34	0.39	0.06	1.01	0.41
UNINOCULATED-9	7.04	0.17	0.17	0.02	0.4	0.01	0.7	0.17	2.39	0.03	0.6	0.58	0.58	7.56	1.53	9.89	8.7	18.83	17.35	21.29	11.28	23.19	11.46	2.1	0.87	4.59	2.04
UNINOCULATED-10	7.65	0.06	0.09	0.01	0.05	0	0.18	0.04	0.32	0.06	0.17	0.87	0.83	4.94	1.1	6.19	6.35	12.18	10.22	12.41	7.2	14.91	6.94	1.48	0.62	3.12	1.29
UNINOCULATED-11	4.98	0.2	0.42	0.01	0.27	0.06	0.76	0.07	0.82	0.39	0.72	3.5	3.03	19.08	5.42	23.94	27.18	41.67	50.28	47.33	29.27	40.49	25.13	0.01	2.66	8.55	4.53
UNINOCULATED-12	7.23	0.03	0.05	0.01	0.03	0	0.09	0.02	0.18	0.02	0.07	0.5	0.48	2.7	0.63	3.97	3.88	7.62	7.06	8.2	4.67	8.2	4.15	0.83	0.44	1.97	0.81
TRV2-LIC-1	2.65	0.06	0.13	0.01	0.1	0.04	0.28	0.04	0.29	0.22	0.19	1.29	0	6.46	0.51	7.07	6.81	11.19	11.51	12.73	6.5	10.36	6.1	1.05	0.23	2.03	0.64
TRV2-LIC-2	1.73	0.2	0.48	0.04	0.32	0.13	0.77	0.1	0.87	0.59	0.7	2.84	0	15.81	3.6	19.13	17.89	26.86	27.75	29.89	14.85	24.3	15.68	2.12	1.98	5.1	2.91
TRV2-LIC-3	8.62	0.12	0.16	0.01	0.16	0.03	0.26	0.06	0.68	0.04	0.15	1.04	1.04	4.75	0.81	5.61	7.44	11.15	9.71	11.78	8.77	12.37	5.44	1.29	0.01	2.79	0.98
TRV2-LIC-4	2.18	0.11	0.18	0.01	0.12	0.17	0.25	0.04	0.41	0.04	0.13	1.06	0.02	4.31	0.29	5.31	6.07	11.8	7.63	11.18	6.71	11.2	0.05	1.2	0.01	2.33	0.5
TRV2-LIC-5	3.76	0.11	0.16	0.01	0.1	0.13	0.26	0.05	0.39	0.04	0.09	0.01	0.01	3.73	0.29	5.3	5.26	11.14	11.73	11.73	6.43	9.39	0.1	1.19	0.01	2.14	0.71
TRV2-LIC-6	2.17	0.07	0.1	0.01	0.08	0.13	0.18	0.03	0.29	0.06	0.11	1	0.01	4.01	0.46	5.24	6.49	10.17	9.47	11.24	6.73	10.65	0.04	1.21	0.07	2.31	0.96
TRV2-LIC-7	3.14	0.1	0.18	0.01	0.1	0.15	0.25	0.04	0.36	0.01	0.13	0.01	0.01	4.63	0.37	5.12	6.28	10.15	10.25	10.25	7.13	13.14	0.06	1.17	0.57	2.56	1.13
TRV2-LIC-8	2.3	0.01	0.02	0	0.01	0.02	0.02	0	0.04	0.01	0.06	0.01	0.01	0.25	0.01	0.35	0.18	0.75	0.61	0.01	0.56	0.8	0.01	0.03	0.01	0.16	0.04
TRV2-LIC-9	2.55	0.16	0.42	0.02	0.22	0.16	0.74	0.12	0.62	0.02	0.52	0.07	0.09	15.71	3.46	17.56	18.69	28.51	31.56	31.56	19.4	27.89	0.13	2.57	2.4	6.13	3.37
ASAT2-1-1	5.01	0.04	0.01	0.25	0.14	0.13	0.12	0.02	0.44	0.13	0.13	2.87	2.87	6.72	5.98	3.53	14.34	5.38	13.05	4.17	4.48	3.3	1.08	0.09	0.03	0.44	0.09
ASAT2-1-2	2.52	0.02	0.01	0.23	0.12	0.17	0.11	0.06	0.46	0.16	0.19	3.08	0	6.44	6.55	4.32	18.99	4.97	16.12	3.61	4.68	3.85	1.6	0.19	0.04	0.71	0.18
ASAT2-1-3	4.39	0	0	0.01	0.01	0.01	0.02	0	0.01	0.12	0.43	2.04	0	3.45	6.63	1.48	12.27	3.06	10.93	2.35	3.97	2.18	0.64	0.06	0.01	0.37	0.06
ASAT2-1-4	4.33	0.02	0.02	0.13	0.12	0.07	0.11	0.05	0.48	0.11	0.45	2.91	2.14	5.81	5.52	4.17	17.16	5.65	13.58	3.71	4.13	4.51	1.44	0.38	0.05	0.85	0.2
ASAT2-1-5	2.41	0.01	0.03	0.01	0.03	0.01	0.07	0.02	0.07	0.07	0.33	2.02	2.02	4.73	5.27	3.78	14.2	4.83	14.26	3.71	4	3.96	1.46	0.39	0.07	0.87	0.21
ASAT2-1-6	10.31	0.01	0.08	0.07	0.02	0.08	0.14	0.01	0.06	0.3	0.59	4.74	4.56	11.55	10.53	7.96	33.9	8.47	38.67	7.47	9.55	6.55	2.78	0.01	0.16	1.36	0.44
ASAT2-1-7	0	23.29	44.02	49.6	44.85	17.02	32.16	28.56	26.94	44.59	42.03	112.47	35.66	86.1	153.3	60.36	113.1	108.5	362.16	125.26	277.78	75.55	71.79	40.62	36.34	175.44	46.16
ASAT2-1-8	4.78	0.04	0.05	0.11	0.07	0.15	0.19	0.04	0.39	0.45	0.19	3.03	2.66	9.41	5.71	7.83	19.72	7.2	28.88	8.65	10.16	5.27	3.27	0.49	0.14	1.02	0.4
ASAT2-2-1	4.9	0.03	0.02	0.11	0.04	0.02	0.12	0.02	0.37	0.01	0.23	0.43	0.43	0.37	2.14	1.02	4.25	1.62	2.94	1	1.41	1.28	0.13	0.06	0.03	0.2	0.02
ASAT2-2-2	7.42	0.04	0.06	0.33	0.13	0.29	0.15	0.04	0.52	0.29	0.65	4	4	8.26	8.37	5.41	27.96	6.47	26.48	5.15	7.51	5.66	2.11	0.43	0.03	1.06	0.28
ASAT2-2-3	4.27	0.06	0.02	0.28	0.2	0.1	0.29	0.05	0.97	0.05	1.04	2.3	2.3	5.51	7.09	4.9	21.15	7.01	11.8	4.43	4.85	7.04	2.04	0.72	0.03	1.54	0.31
ASAT2-2-4	5.78	0.05	0.06	0.59	0.29	0.47	0.3	0.08	1.24	0.36	1.19	6.87	6.59	16.07	17.39	11.11	60.74	16.23	43.73	11.89	13	15.5	5	1.55	0.16	3.22	0.94
ASAT2-2-5	7.03	0.04	0.01	0.39	0.17	0.16	0.21	0.04	0.88	0.13	1.15	3.4	3.4	6.84	10.89	5.61	32.1	8.46	18.42	4.92	6.54	8.04	0.24	0.84	0.01	1.5	0.21
ASAT2-2-6	3.77	0.03	0.02	0.16	0.11	0.08	0.2	0.01	0.61	0.03	0.56	1.62	1.62	4.27	4.69	3.4	15.04	5.64	9.57	3.57	3.78	5.38	0.38	0.48	0	1.11	0.18
ASAT2-2-7	6.38	0.01	0.01	0.41	0.09	0.38	0.16	0.01	0.53	0.63	0.98	7.26	7.15	16.65	17.44	10.97	58.15	11.12	53.16	8.87	15.61	9.89	3.99	0.92	0.08	2.06	0.64
ASAT2-2-8	5.21	0.03	0.07	0.28	0.17	0.48	0.44	0.06	0.66	1.02	0.45	9.55	9.37	26.31	14.92	15.58	53.89	18.63	58.27	19.58	16.79	12.42	8.37	1.21	0.94	2.54	1.32
ASAT2-2-9	5.35	0.01	0.01	0.01	0.03	0.02	0.11	0.03	0.09	0.15	0.88	4	3.89	7.9	9.91	5.86	26.12	8.08	24.12	6.34	6.73	6.41	2.55	0.74	0.12	1.65	0.44
ASAT2-2-10	3.38	0	0	0	0.01	0	0	0	0.02	0.02	0.03	0.2	0.2	0.4	0.71	0.45	1.71	0.72	1.2	0.38	0.63	0.55	0.11	0.01	0.01	0.11	0.01
ASAT3-2-1	8.39	2.57	3.07	1.58	2.42	10.02	7.39	8.81	1.02	0.51	2.85	2.03	0.01	7.11	1.48	7.93	0	5.11	14.36	6.99	6.57	3.12	2.17	0.33	0.32	0.66	0.36
ASAT3-2-2	4.19	3.92	5.44	2.73	6.35	12.89	16.37	8.44	6.33	1.23	5.17	8.26	6.98	39.24	8.76	42.14	45.92	67.99	67.47	68.76	42.93	56.36	31.98	6.65	1.75	12.35	5.38
ASAT3-2-3	3.22	0.31	0.57	0.23	0.86	1.1	1.9	0.74	1.34	0.02	0.75	0.25	0.25	0.94	0.35	1.05	1.69	1.84	1.81	1.54	1.24	1.47	0.4	0.07	0.01	0.3	0.02
ASAT3-2-4	7.13	4.02	4.74	2.85	3.84	16.8	11.53	12.61	1.78	0.54	3.89	2.36	2.29	8.87	2.42	9.81	12.39	8.16	21.93	10.48	9.2	6.79	4.21	0.64	0.38	1.6	0.82
ASAT3-2-5	11.52	6.83	7.87	3.77	5.47	24.95	15.07	19.42	1.92	0.83	4.62	3.44	0.96	11.87	2.76	12.07	12.49	6.68	24.21	8.29	9.49	4.16	2.56	0.48	0.34	0.92	0.42
ASAT3-2-6	5.62	1.43	2.54	1.28	2.59	6	6.46	3.92	2.81	0.18	2.12	1.22	1.18	4.16	1.01	3.72	5.26	5.16	7.71	4.84	3.43	3.54	1.64	0.36	0.12	0.84	0.26
ASAT3-2-7	10.73	4.24	5.61	3.43	6.62	17.42	17.84	11.41	6.37	0.76	5.21	4.73	4.73	16.37	4.64	16.33	21.4	21.43	32.06	20.77	12.63	13.05	6.02	1.29	0.75	3.29	1.26
ASAT5-1-1	3.85	0.13	0.06	0.01	0.25	0	0.12	0	0.09	0.04	0.15	1.4	1.4	4.38	0.24	4.92	1.93	8.56	1.44	5.8	1.53	2.41	0.97	0.26	0.05	0.49	0.14
ASAT5-1-2	4.2	0.09	0.08	0	0.13	0	0.11	0.01	0.06	0.02	0.19	2.21	2.21	4.83	0.53	5.99	1.9	10.97	1.71	6.43	1.72	2.24	0.86	0.32	0.04	0.46	0.09
ASAT5-1-3	4.1	0.05	0.01	0.01	0.11	0	0.04	0	0.06	0.01	0.06	0.79	0.75	2.09	0.34	2.31	0.71	3.92	0.67	2.03	0.64	0.94	0.24	0.07	0	0.15	0.03
ASAT5-1-4	4.99	0.11	0.08	0	0.2	0	0.13	0	0.07	0.04	0.16	1.95	1.92	4.81	0.28	5.29	1.61	10.31	1.49	6.78	1.26	2.13	0.87	0.26	0.05	0.44	0.11
ASAT5-1-5	3.45	0.01	0	0	0.01	0	0.01	0	0.02	0.01	0.02	0.05	0.05	0.13	0.03	0.19	0.17	0.35	0.07	0.21	0.12	0.15	0.02	0.02	0.02	0.04	0.02
ASAT5-1-6	4.38	0.07	0.02	0.01	0.11	0	0.06	0	0.07	0.02	0.07	1.07	1.07	2.23	0.51	3.17	1.02	4.94	1.03	2.92	1.17	1.49	0.45	0.24	0.03	0.35	0.08
ASAT5-1-7	2.54	0.24	0.29	0.01	0.51	0.01	0.65	0.01	0.23	0.87	0.14	8.02	7.65	22.77	1.95	22.68	7.84	36.14	11.72	30.31	4.61	10.43	4.68	1.26	0.57	2.65	1.16
ASAT5-1-8	4.72	0.15	0.18	0	0.35	0.01	0.56	0.01	0.28	0.88	0.22	6.7	6.62	21.86	0.96	22.13	10.44	37.63	16.74	34.53	6.95	13.25	6.63	1.75	0.64	3.9	1.62
ASAT5-1-10	11.29	0.76	1.34	0.03	1.5	0.07	2.69	0.03	0.47	8.48	0.31	41.87	39.45	120	8.69	130.16	33.56	145.65	53.56	146.36	20.24	35.89	24.66	0	5.08	8.92	4.8
ASAT5-1-11	3.96	0.14	0.16	0	0.23	0	0.41	0.01	0.16	0.39	0.27	5.56	5.25	16	2.37	16.49	6.84	29.21	9.9	24.12	5.13	9.49	4.17	1.4	0.66	2.74	1.1
ASAT5-1-12	5.31	0.48	0.22	0.02	1.15	0.01	0.58	0.09	0.54	0.25	0.16	3.08	3.01	13.09	1.01	15.92	3.06	23.67	4.14	16.68	4.17	5.54	2.18	0.83	0.13	1.25	0.34
ASAT5-2-1	5.38	0.09	0.14	0.01	0.25	0	0.19	0.02	0.05	0.17	0.18	3.49	3.49	8.24	0.92	8.32	1.57	12.72	1.76	9.06	1.31	1.95	0.83	0.07	0.12	0.12	0.03
ASAT5-2-2	6.2	0.36	0.52	0.02	0.78	0.03	1.25	0.01	0.19	2.11	0.17	17.6	15.75	43.55	0.64	41.53	7.55	49	12.61	47.19	4.73	9.42	6.45	0.8	0	2.01	0.97
ASAT5-2-3	9.54	0.17	0.15	0.02	0.42	0.01	0.49	0.02	0.14	0.78	0.17	5.23	0	17	1.14	15.24	3.49	22.46	5.73	21.03	2.91	5.1	2.53	0.47	0.04	0.96	0.37
ASAT5-2-4	4.84	0.42	0.39	0.01	0.61	0.03	1.04	0.02	0.18	1.9	0.25	19.59	0	46.9	1.15	48.71	10.95	58.84	15.08	49.25	6.39	13.07	6.93	1.39	0.53	3.14	1.21
ASAT5-2-5	3.35	0.42	0.8	0.02	0.86	0.01	1.39	0.02	0.19	1.94	0.19	18.59	18.18	46.78	1.06	45.41	8.99	59.16	11.94	52.99	5.92	12.48	6.95	1.18	0.4	2.51	1.08
ASAT5-2-6	4.41	0.5	0.87	0.01	1.11	0.05	1.87	0.03	0.18	4.36	0.19	29.53	29.53	67.48	1.52	70.06	11.75	72.1	17.55	69.36	6.29	13.23	8.07	1.1	0.01	2.12	0.33
ASAT5-2-7	3.7	0.41	0.55	0.01	0.79	0.01	1.07	0.01	0.18	1.82	0.14	15.01	15.01	40.54	1.05	42.23	8.47	50.06	10.69	46.61	4.16	10.82	3.86	1.14	0.02	2.01	0.16
ASAT5-2-8	5.04	0.27	0.32	0	0.41	0.01	0.66	0.03	0.12	0.9	1.71	12.51	0.12	28.47	0.84	28.11	7.65	43.55	7.19	34.05	4.3	9.14	3.63	0.97	0.01	1.79	0.55
ASAT5-2-9	0	18.82	60.2	61.02	57.57	53.76	61.26	55.56	77.22	92.26	129.13	33.58	0	95.46	30.96	100.83	28.79	249.2	253.62	204.95	54.87	117.11	44.45	38.05	46.26	33.83	44.9
ASAT5-2-10	5.86	0.33	0.43	0.02	0.51	0.01	0.83	0.01	0.13	1.36	0.13	13.16	13.16	41.24	1.42	33.1	7.62	48.91	9.36	45.79	3.82	10.84	3.75	1.14	0.03	2.36	0.24
ASAT5-2-11	6.14	0.36	0.49	0.01	0.82	0.01	1.06	0.03	0.74	0.59	0.39	10.61	10.36	32.41	4.49	33.76	17.24	55.85	23.01	49.76	16.57	26.65	12.73	3.2	1.67	6.93	3.1
