# Supplementary material for: Evolutionary routes to biochemical innovation revealed by integrative analysis of a plant-defense related specialized metabolic pathway
Source: eLife. 2017 Aug 30;6:e28468. doi: 10.7554/eLife.28468 (PMC5595436; doi:10.7554/eLife.28468)
Supplement: Figure 6—source data 1. — The ‘Sequences’ sheet shows the Petunia sequences used for TBLASTN against the Asterids database of 1kp (Nadakuduti et al., 2017). Other sheets show the tabular output of TBLASTN using individual ASATs as the query. The best matching non-Solanaceae sequences were used for making the phylogenetic trees shown in Figure 6 and Figure 6—figure supplement 3A. [file elife-28468-fig6-data1.xlsx]

## Sheet: MAIN
		Figure 6-Source Data 1	Results of BLAST against 1kp database. The "Sequences" sheet shows the Petunia sequences used for TBLASTN against the Asterids database of 1kp (Nadakuduti et al, Plant Phys, in press). Other sheets show the tabular output of TBLASTN using individual ASATs as the query. The best matching non-Solanaceae sequences were used for making the phylogenetic trees shown in Figure 6 and Figure 6-Figure Supp…

## Sheet: Sequences
			>PaASAT1 MAAPALVSLSKKIIKPFSPTPFSERVYKFSFLDQFNSTQYVPLVFFYPKNKGIEPSDMCKVIENSLSKALAAYYPFAGTLKDNVCVECNDNGADFFKARFDCPMSEILKSHDRDVKEIVFPKDMPWNVIAPNRKLLTVQFNQFDCGGIAVSACMSHKIGDMCTFNKFLHDWAAIARDSNENVSPQFIGSSIFPPTNEPLTEPLREQCVSKRLLFSNHTLRSLATDSEVKNPTRVETLTALLYKCAMKANYSSSFKSSILFQTINLRPIIPLPDNTPGNLSSSFFVPTYNEEEMKLSRLISQLRKEKEELFANFRKCKGNEDLVSATMGPFQQIRKLLKEGDFQLFRCSSLVNYPLYDVDFGWGSPGKVIMADFLSRNFFTLLEDKTGEHL…
			>PaASAT2 MAASRLALLSRKIIKPSSPTPLSQRIHKLSLMDQMGTHSSAPFVFFYPKQETARSLEPAKVSQIFEKSLSKVLTAYYPFAGRVKDNSIVECNDMGVDLSEVHIDCPMSTIFHHPRTYVDDLIFPKGIPWSSPKDSCLVVAQLSHFECGGIALSACISHKVSDGYSTINFLRDWAMVARNSDAKPSPLFNGASIFKPVNFSSPPVVVDPPLKQNVSERYHFSATKLKSLKALISADSKSQNIPTTVEAITAFLCKCVNTPTFRPSLLIQAVNIRGTNNDALVPADLVGNAFLPFAVSAANKEELNYQRLVDELRNGKEKIRDTLKYNKSEELLCSRVPEIARELNKQTSSNDISIYRFTSLRKFPFHDINFGWGMPRKVDLATVPVNMFIL…
			>PaASAT3 MGCVSNLVSSVTKKIIKPYSPTPTSLRCHKLSYLDQIIGSIFMPVALFYPKYSDRKPSIDISEHLEKSLSKVLTHYYPFAGKLNNNVSVDCNDSGVEFYTTKIDCPMSQIINNPYADKEDVVFPKGVPCSSSYEGSPAVIQLSHFDCGGIAISTCLTHKIGDAYTMGNFLKDWATITRDPSSKILPSPQFNGASFFPPSKDLSNLPIVVPESEECSSRNFVFSASKLAALKARVISQSQVQNPTNTEIVSSFIYQRVMAINKRTLGVTRPSLLVQGASLRPPLPVNTMGNIGSFFSVLTTEEKEMDLPRVVGKLRKAKEEYRQKYKHAKTNEYLPITTGLYRDADEYFTNNCYDIYRFTSVTNFPFYDVDFGWGKPERYSPSSYGPVRNM…

## Sheet: PaASAT1
PaASAT1|Ax39119	scaffold-BOLZ-2029346-Atropa_belladonna	78.96	328	64	5	1	323	24	1007	0	538
PaASAT1|Ax39119	scaffold-BOLZ-2029346-Atropa_belladonna	55.32	94	32	10	329	422	1010	1261	2e-23	108
PaASAT1|Ax39119	scaffold-BOLZ-2029345-Atropa_belladonna	79.58	284	54	4	1	280	24	875	0	472
PaASAT1|Ax39119	scaffold-BOLZ-2029345-Atropa_belladonna	63.69	157	55	2	275	430	860	1327	0	210
PaASAT1|Ax39119	scaffold-EMAL-2005913-Ehretia_acuminata	42.38	420	225	17	1	405	85	1338	2e-104	324
PaASAT1|Ax39119	scaffold-BOLZ-2171211-Atropa_belladonna	42.4	434	224	26	1	418	1520	249	5e-100	314
PaASAT1|Ax39119	scaffold-EMAL-2005912-Ehretia_acuminata	39.81	417	228	23	9	405	75	1316	6e-95	300
PaASAT1|Ax39119	scaffold-BOLZ-2171050-Atropa_belladonna	40.88	433	233	23	7	422	57	1337	7e-95	300
PaASAT1|Ax39119	scaffold-GHLP-2057362-Solanum_dulcamara	40.14	441	231	33	1	418	1424	132	3e-91	290
PaASAT1|Ax39119	scaffold-BOLZ-2038238-Atropa_belladonna	41.32	438	229	28	2	415	1410	109	4e-91	290
PaASAT1|Ax39119	scaffold-LQJY-2007343-Solanum_xanthocarpum	38.86	440	232	37	1	415	58	1341	2e-89	286
PaASAT1|Ax39119	scaffold-IPPG-2059346-Heliotropium_filiforme-juvenile_leaf	36.34	432	258	17	1	418	152	1438	5e-89	288
PaASAT1|Ax39119	scaffold-OEKO-2015565-OEKO-Heliotropium_filiforme-2_samples_combined	36.34	432	258	17	1	418	59	1345	9e-89	288
PaASAT1|Ax39119	scaffold-DKFZ-2016727-Mertensia_paniculata	40.91	418	225	22	9	412	225	1454	1e-86	279
PaASAT1|Ax39119	scaffold-NIGS-2002637-Heliotropium_karwinsky	37.26	424	249	17	9	418	13	1275	1e-86	278
PaASAT1|Ax39119	scaffold-OUER-2027258-Heliotropium_convolvulaceum	38.37	404	228	21	25	415	1282	95	2e-86	276
PaASAT1|Ax39119	scaffold-ABEH-2013086-Heliotropium_greggii	39.33	445	233	37	1	412	24	1346	6e-86	277
PaASAT1|Ax39119	scaffold-LQJY-2082072-Solanum_xanthocarpum	39.09	440	238	30	1	418	1856	561	2e-85	279
PaASAT1|Ax39119	scaffold-XVRU-2029900-XVRU-Heliotropium_calcicola-3_samples_combined	37.15	428	249	20	1	412	65	1336	7e-85	273
PaASAT1|Ax39119	scaffold-XVRU-2029902-XVRU-Heliotropium_calcicola-3_samples_combined	36.28	430	253	21	1	412	65	1345	8e-85	273
PaASAT1|Ax39119	scaffold-IDGE-2106182-Heliotropium_racemosum	38.02	434	247	22	1	418	3070	1787	3e-84	285
PaASAT1|Ax39119	scaffold-NIGS-2110309-Heliotropium_karwinsky	36.93	417	244	19	9	412	1427	195	4e-84	273
PaASAT1|Ax39119	scaffold-SXML-2016065-Ilex_paraguariensis	40.82	392	214	18	9	383	141	1313	4e-84	275
PaASAT1|Ax39119	scaffold-OUER-2008485-Heliotropium_convolvulaceum	37.76	429	238	29	9	415	2034	769	3e-83	276
PaASAT1|Ax39119	scaffold-DKFZ-2068695-Mertensia_paniculata	37.75	400	232	17	9	392	1318	122	1e-82	267
PaASAT1|Ax39119	scaffold-MKZR-2110551-Nicotiana_sylvestris	38.25	400	218	29	41	418	1447	269	6e-82	266
PaASAT1|Ax39119	scaffold-JNVS-2050220-Datura_metel	36.49	433	237	38	9	418	107	1360	3e-81	265
PaASAT1|Ax39119	scaffold-MZOB-2012709-Heliotropium_mendocinum	37.59	415	237	22	9	410	66	1283	3e-81	263
PaASAT1|Ax39119	scaffold-VJSJ-2026958-Heliotropium_calcicola	40	425	230	25	9	415	1469	216	9e-81	265
PaASAT1|Ax39119	scaffold-IDGE-2105614-Heliotropium_racemosum	36.79	424	239	29	14	415	89	1339	1e-80	262
PaASAT1|Ax39119	scaffold-XVRU-2046087-XVRU-Heliotropium_calcicola-3_samples_combined	40	425	230	25	9	415	1469	216	2e-80	265
PaASAT1|Ax39119	scaffold-IDGE-2025815-Heliotropium_racemosum	36.34	421	249	19	1	405	1450	197	2e-80	263
PaASAT1|Ax39119	scaffold-IDGE-2009207-Heliotropium_racemosum	35.01	437	258	26	1	412	1431	124	3e-79	259
PaASAT1|Ax39119	scaffold-KPUM-2102358-Exacum_affine	36.73	392	228	20	8	383	1585	422	5e-79	262
PaASAT1|Ax39119	scaffold-HLJG-2153453-Viburnum_odoratissimum	34.52	423	242	35	4	409	1379	165	2e-78	260
PaASAT1|Ax39119	scaffold-JCLQ-2044373-Apocynum_androsaemifolium-A	36.94	425	251	17	5	415	1341	76	3e-78	256
PaASAT1|Ax39119	scaffold-HLJG-2153394-Viburnum_odoratissimum	36.3	416	233	32	2	399	1459	254	5e-78	257
PaASAT1|Ax39119	scaffold-JWEY-2020245-Heliotropium_sp.	38.6	399	223	22	40	419	1380	193	6e-78	255
PaASAT1|Ax39119	scaffold-UFQC-2004442-Apocynum_androsaemifolium-B	36.94	425	251	17	5	415	156	1421	7e-78	256
PaASAT1|Ax39119	scaffold-SNBI-2012701-Sambucus_canadensis	36.19	420	240	28	10	415	1394	177	8e-78	256
PaASAT1|Ax39119	scaffold-HGSM-2070554-Gelsemium_sempervirens	36.45	439	255	24	10	429	1364	63	8e-78	256
PaASAT1|Ax39119	scaffold-LQJY-2080100-Solanum_xanthocarpum	38	421	239	22	9	418	18	1247	1e-77	254
PaASAT1|Ax39119	scaffold-YFQX-2001937-YFQX-Apocynum_androsaemifolium-2_samples_combined	36.94	425	251	17	5	415	156	1421	2e-77	256
PaASAT1|Ax39119	scaffold-NIGS-2110308-Heliotropium_karwinsky	34.72	432	255	27	1	412	1447	173	3e-77	255
PaASAT1|Ax39119	scaffold-OSMU-2080126-Lycium_sp.	34.69	467	244	61	6	428	108	1457	3e-76	254
PaASAT1|Ax39119	scaffold-MZOB-2011194-Heliotropium_mendocinum	45.7	186	99	2	9	192	92	649	2e-75	182
PaASAT1|Ax39119	scaffold-MZOB-2011194-Heliotropium_mendocinum	34.22	225	130	18	206	419	708	1361	2e-75	124
PaASAT1|Ax39119	scaffold-GSZA-2011755-Lonicera_japonica	35.55	422	241	31	7	412	13	1233	6e-75	251
PaASAT1|Ax39119	scaffold-HLJG-2025035-Viburnum_odoratissimum	35.48	403	231	29	9	394	173	1345	7e-75	248
PaASAT1|Ax39119	scaffold-MZOB-2004511-Heliotropium_mendocinum	36.94	379	221	18	1	361	2	1138	1e-73	241
PaASAT1|Ax39119	scaffold-DAAD-2042705-Ardisia_revoluta	37.88	433	234	35	1	412	1546	290	6e-73	244
PaASAT1|Ax39119	scaffold-YFQX-2068450-YFQX-Apocynum_androsaemifolium-2_samples_combined	35.49	386	234	15	9	383	1280	135	7e-73	241
PaASAT1|Ax39119	scaffold-ZJRC-2019034-ZJRC-Sambucus_canadensis-2_samples_combined	34.95	392	237	18	15	397	1560	412	1e-72	245
PaASAT1|Ax39119	scaffold-GGJD-2123219-Strychnos_spinosa	36.02	422	239	31	9	412	1496	270	1e-72	243
PaASAT1|Ax39119	scaffold-JCLQ-2044022-Apocynum_androsaemifolium-A	35.49	386	234	15	9	383	17	1162	1e-72	240
PaASAT1|Ax39119	scaffold-BNTL-2001005-Souroubea_exauriculata	37.59	423	237	27	9	415	1485	250	1e-72	243
PaASAT1|Ax39119	scaffold-HLJG-2026155-Viburnum_odoratissimum	36.56	424	245	24	9	415	111	1361	2e-72	244
PaASAT1|Ax39119	scaffold-JGYZ-2000371-Holarrhena_pubescens	42.19	320	168	17	1	306	178	1128	5e-72	238
PaASAT1|Ax39119	scaffold-EMAL-2018618-Ehretia_acuminata	41.43	321	166	22	1	299	964	2	6e-72	236
PaASAT1|Ax39119	scaffold-IDGE-2009208-Heliotropium_racemosum	34.46	415	246	26	23	412	1365	124	7e-72	239
PaASAT1|Ax39119	scaffold-CAQZ-2018164-Symphoricarpos_sp.	35.15	441	237	49	1	410	1507	239	2e-71	241
PaASAT1|Ax39119	scaffold-DKFZ-2068969-Mertensia_paniculata	34.99	443	244	44	9	410	72	1391	3e-71	240
PaASAT1|Ax39119	scaffold-XKVX-2000295-Heliotropium_filiforme-mature_leaf	39.52	248	140	10	1	238	59	802	8e-71	194
PaASAT1|Ax39119	scaffold-XKVX-2000295-Heliotropium_filiforme-mature_leaf	31.12	196	128	7	236	427	789	1367	8e-71	97.4
PaASAT1|Ax39119	scaffold-JGYZ-2004855-Holarrhena_pubescens	38.24	374	204	27	44	393	3	1115	2e-70	234
PaASAT1|Ax39119	scaffold-JGYZ-2001414-Holarrhena_pubescens	41.59	327	167	24	3	306	1081	104	3e-70	232
PaASAT1|Ax39119	scaffold-HANM-2069259-Pholisma_arenarium	45.99	274	128	20	12	266	3	821	4e-70	229
PaASAT1|Ax39119	scaffold-BNTL-2006498-Souroubea_exauriculata	37.44	422	242	22	9	415	50	1294	5e-70	237
PaASAT1|Ax39119	scaffold-VJSJ-2029346-Heliotropium_calcicola	34.31	408	240	28	28	415	1	1200	9e-70	235
PaASAT1|Ax39119	scaffold-XVRU-2171375-XVRU-Heliotropium_calcicola-3_samples_combined	34.31	408	240	28	28	415	1478	279	9e-70	235
PaASAT1|Ax39119	scaffold-QIKZ-2033706-Griselinia_racemosa	36.05	430	246	29	2	412	1547	288	2e-69	236
PaASAT1|Ax39119	scaffold-JCLQ-2005315-Apocynum_androsaemifolium-A	37.43	374	208	26	9	360	1112	3	2e-69	231
PaASAT1|Ax39119	scaffold-JEXA-2013553-Impatiens_balsamifera	34.91	424	250	26	9	415	124	1368	9e-69	232
PaASAT1|Ax39119	scaffold-JTRM-2091156-Dipsacus_sativum	34.05	420	244	33	10	412	132	1343	1e-68	231
PaASAT1|Ax39119	scaffold-BNTL-2025431-Souroubea_exauriculata	32.26	434	277	17	9	429	87	1376	1e-68	232
PaASAT1|Ax39119	scaffold-BFJL-2023027-Cornus_floridana	34.83	422	255	20	9	415	1656	406	5e-68	233
PaASAT1|Ax39119	scaffold-SALZ-2005021-Pittosporum_resiniferum-fruit	36.43	431	242	32	9	415	1351	83	6e-68	230
PaASAT1|Ax39119	scaffold-NTEO-2067838-Pittosporum_sahnianum	34.59	425	260	18	1	412	1455	196	7e-68	231
PaASAT1|Ax39119	scaffold-FXGI-2054068-Stylidium_adnatum	35.27	431	241	38	9	412	179	1438	9e-68	231
PaASAT1|Ax39119	scaffold-JGYZ-2000368-Holarrhena_pubescens	41.3	293	157	15	27	306	3	875	1e-67	224
PaASAT1|Ax39119	scaffold-ZJRC-2003755-ZJRC-Sambucus_canadensis-2_samples_combined	35.64	390	223	28	40	415	297	1424	2e-67	230
PaASAT1|Ax39119	scaffold-LQJY-2001565-Solanum_xanthocarpum	37.16	296	163	23	139	415	918	43	1e-66	164
PaASAT1|Ax39119	scaffold-LQJY-2001565-Solanum_xanthocarpum	48.31	118	54	7	14	126	1286	939	1e-66	114
PaASAT1|Ax39119	scaffold-JPDJ-2001077-Symplocus_sp.	34.37	451	251	45	1	415	146	1471	2e-66	227
PaASAT1|Ax39119	scaffold-SALZ-2070325-Pittosporum_resiniferum-fruit	35.66	429	237	39	10	412	83	1330	2e-66	228
PaASAT1|Ax39119	scaffold-DTOA-2092303-Maesa_lanceolata	32.54	418	262	20	9	412	1275	40	3e-66	224
PaASAT1|Ax39119	scaffold-UOYN-2041939-Catharanthus_roseus	35.92	451	247	42	8	429	39	1352	5e-66	225
PaASAT1|Ax39119	scaffold-EDBB-2086749-Polyscias_fruticosa	33.49	415	250	26	9	405	22	1242	1e-65	223
PaASAT1|Ax39119	scaffold-EITK-2034113-Hedera_helix-aerial_root	33.17	419	251	29	9	408	165	1391	1e-65	225
PaASAT1|Ax39119	scaffold-VKJD-2131033-VKJD-Maesa_lanceolata-2_samples_combined	32.54	418	262	20	9	412	100	1335	2e-65	224
PaASAT1|Ax39119	scaffold-IHPC-2074198-Platycodon_grandiflorus	34.9	447	232	59	6	415	1386	112	2e-65	224
PaASAT1|Ax39119	scaffold-FFFY-2060551-Valeriana_officianalis	34.65	404	238	26	8	399	1450	281	2e-65	224
PaASAT1|Ax39119	scaffold-IHPC-2074225-Platycodon_grandiflorus	32.5	440	254	43	9	415	79	1368	3e-65	224
PaASAT1|Ax39119	scaffold-OSMU-2067498-Lycium_sp.	78.74	127	23	4	29	152	1	378	3e-64	208
PaASAT1|Ax39119	scaffold-GSZA-2071698-Lonicera_japonica	37.15	323	186	17	1	309	144	1103	1e-63	216
PaASAT1|Ax39119	scaffold-ECTD-2028993-Gentiana_acaulis	34.32	405	232	34	9	390	1446	265	1e-63	219
PaASAT1|Ax39119	scaffold-CAQZ-2018165-Symphoricarpos_sp.	37.92	298	154	31	127	410	1136	294	1e-63	188
PaASAT1|Ax39119	scaffold-CAQZ-2018165-Symphoricarpos_sp.	37.4	131	65	17	1	115	1561	1172	1e-63	79.7
PaASAT1|Ax39119	scaffold-FFFY-2006726-Valeriana_officianalis	33.73	415	239	36	2	399	1400	213	3e-63	218
PaASAT1|Ax39119	scaffold-QEHE-2092064-Rauvolfia_tetraphyla	34.38	416	249	24	8	413	190	1395	4e-63	218
PaASAT1|Ax39119	scaffold-QEHE-2010212-Rauvolfia_tetraphyla	35.52	397	232	24	41	427	2	1150	4e-63	214
PaASAT1|Ax39119	scaffold-XVRU-2029903-XVRU-Heliotropium_calcicola-3_samples_combined	34.62	364	217	21	72	418	3	1082	8e-63	214
PaASAT1|Ax39119	scaffold-QEHE-2024055-Rauvolfia_tetraphyla	35.07	422	251	23	1	412	35	1261	2e-62	215
PaASAT1|Ax39119	scaffold-SNNC-2050574-Leonurus_japonicus	35.24	403	232	29	9	394	45	1217	6e-62	213
PaASAT1|Ax39119	scaffold-QRNU-2171255-Sambucus_canadensis-B	35.77	369	209	28	61	415	7	1071	7e-62	213
PaASAT1|Ax39119	scaffold-GGJD-2020259-Strychnos_spinosa	33.18	431	255	33	9	412	342	1616	5e-61	216
PaASAT1|Ax39119	scaffold-GIOY-2002450-Corokia_cotoneaster	32.57	436	241	53	10	399	1321	35	6e-61	211
PaASAT1|Ax39119	scaffold-YFQX-2009828-YFQX-Apocynum_androsaemifolium-2_samples_combined	33.65	422	244	36	8	399	1549	302	1e-60	212
PaASAT1|Ax39119	scaffold-TQKZ-2012791-Angelica_archangelica	31.6	443	256	47	6	412	1624	329	1e-60	214
PaASAT1|Ax39119	scaffold-VJSJ-2024352-Heliotropium_calcicola	35.17	344	206	17	83	412	1102	80	2e-60	207
PaASAT1|Ax39119	scaffold-JCLQ-2005855-Apocynum_androsaemifolium-A	33.65	422	244	36	8	399	1545	298	2e-60	211
PaASAT1|Ax39119	scaffold-SALZ-2016612-Pittosporum_resiniferum-fruit	33.41	422	252	29	10	412	1472	237	6e-60	210
PaASAT1|Ax39119	scaffold-UOYN-2041261-Catharanthus_roseus	33.5	412	244	30	8	405	1301	114	6e-60	208
PaASAT1|Ax39119	scaffold-WEQK-2067018-Centella_asiatica	31.75	422	251	37	9	399	170	1417	6e-60	210
PaASAT1|Ax39119	scaffold-JGYZ-2000370-Holarrhena_pubescens	44.92	256	123	18	42	279	3	770	8e-60	202
PaASAT1|Ax39119	scaffold-DCCI-2082975-Calceolaria_pinifolia	31.59	421	260	28	1	402	1422	187	8e-60	209
PaASAT1|Ax39119	scaffold-UCNM-2010193-Ajuga_reptans	34.77	371	220	22	9	365	28	1116	2e-59	206
PaASAT1|Ax39119	scaffold-UEEN-2163506-Forestiera_segregata	30.59	425	270	25	9	417	1458	211	2e-59	209
PaASAT1|Ax39119	scaffold-YFQX-2069168-YFQX-Apocynum_androsaemifolium-2_samples_combined	32.45	416	255	26	9	402	29	1264	3e-59	207
PaASAT1|Ax39119	scaffold-JCLQ-2044840-Apocynum_androsaemifolium-A	32.45	416	255	26	9	402	1513	278	3e-59	207
PaASAT1|Ax39119	scaffold-GGJD-2020258-Strychnos_spinosa	33.03	433	256	34	7	412	129	1406	5e-59	209
PaASAT1|Ax39119	scaffold-ZSGF-2074142-ZSGF-Psychotria_ipecacuanha-2_samples_combined	33.03	439	251	43	9	415	164	1447	5e-59	209
PaASAT1|Ax39119	scaffold-QIKZ-2027267-Griselinia_racemosa	34.91	401	234	27	34	415	1403	225	6e-59	211
PaASAT1|Ax39119	scaffold-BQEQ-2058168-Psychotria_ipecacuanha-invitro_plantlet	33.03	439	251	43	9	415	1659	376	9e-59	209
PaASAT1|Ax39119	scaffold-SALZ-2068975-Pittosporum_resiniferum-fruit	31.96	388	241	23	16	387	3	1145	9e-59	204
PaASAT1|Ax39119	scaffold-GUMF-2026913-Anthemis_tinctoria	34.57	431	230	52	9	399	1263	7	1e-58	205
PaASAT1|Ax39119	scaffold-XQRV-2014491-XQRV-Ipomoea_purpurea-2_samples_combined	41.09	258	135	17	1	244	12	776	2e-58	198
PaASAT1|Ax39119	scaffold-SNBI-2005428-Sambucus_canadensis	38.36	232	139	4	15	242	1352	657	2e-58	174
PaASAT1|Ax39119	scaffold-SNBI-2005428-Sambucus_canadensis	30.2	149	93	11	251	397	610	191	2e-58	76.6
PaASAT1|Ax39119	scaffold-AJFN-2024153-Mydocarpus_sp.	31.86	430	239	54	9	399	166	1410	2e-58	205
PaASAT1|Ax39119	scaffold-OSMU-2076670-Lycium_sp.	41.24	291	149	22	120	396	897	49	4e-58	199
PaASAT1|Ax39119	scaffold-UFQC-2006897-Apocynum_androsaemifolium-B	33.18	434	246	44	9	412	45	1304	4e-58	205
PaASAT1|Ax39119	scaffold-NGRR-2022499-Ternstroemia_gymnanthera	33.49	430	254	32	11	421	59	1309	4e-58	206
PaASAT1|Ax39119	scaffold-JGYZ-2045647-Holarrhena_pubescens	33.25	424	239	44	9	399	1755	517	7e-58	206
PaASAT1|Ax39119	scaffold-MHYG-2082147-MHYG-Conzya_canadensis-2_samples_combined	33.16	374	219	31	21	377	1080	1	1e-57	199
PaASAT1|Ax39119	scaffold-GNPX-2002793-Oxera_neriifolia	34.83	402	232	30	9	394	28	1191	1e-57	204
PaASAT1|Ax39119	scaffold-NGRR-2024947-Ternstroemia_gymnanthera	31.8	434	265	31	9	418	1565	285	2e-57	204
PaASAT1|Ax39119	scaffold-OINM-2002514-Hydrocotyle_umbellata	33.64	431	250	36	9	412	65	1330	2e-57	204
PaASAT1|Ax39119	scaffold-YFQX-2004358-YFQX-Apocynum_androsaemifolium-2_samples_combined	41.42	169	92	7	9	172	96	596	2e-57	131
PaASAT1|Ax39119	scaffold-YFQX-2004358-YFQX-Apocynum_androsaemifolium-2_samples_combined	36.53	219	119	20	183	381	628	1284	2e-57	115
PaASAT1|Ax39119	scaffold-JOPH-2015430-Psychotria_ipecacuanha-root_culture	32.8	439	252	43	9	415	1593	310	2e-57	204
PaASAT1|Ax39119	scaffold-OINM-2028276-Hydrocotyle_umbellata	42.64	258	123	25	9	248	788	36	2e-57	196
PaASAT1|Ax39119	scaffold-UFHF-2012590-Galax_urceolata-tetraploid	30.23	440	266	41	9	412	1363	59	4e-57	201
PaASAT1|Ax39119	scaffold-UCNM-2008085-Ajuga_reptans	32.84	408	244	30	8	401	1448	273	5e-57	202
PaASAT1|Ax39119	scaffold-FFFY-2003753-Valeriana_officianalis	32.19	407	254	22	1	397	230	1414	5e-57	202
PaASAT1|Ax39119	scaffold-YFQX-2004357-YFQX-Apocynum_androsaemifolium-2_samples_combined	41.54	195	107	7	9	198	96	674	5e-57	154
PaASAT1|Ax39119	scaffold-YFQX-2004357-YFQX-Apocynum_androsaemifolium-2_samples_combined	38.85	139	79	6	228	360	785	1201	5e-57	91.3
PaASAT1|Ax39119	scaffold-MZOB-2002916-Heliotropium_mendocinum	31.35	437	250	50	9	412	44	1303	1e-56	199
PaASAT1|Ax39119	scaffold-FFFY-2013271-Valeriana_officianalis	33.33	408	235	37	29	415	1683	508	1e-56	202
PaASAT1|Ax39119	scaffold-UFQC-2054804-Apocynum_androsaemifolium-B	33.33	378	226	26	9	364	21	1142	1e-56	197
PaASAT1|Ax39119	scaffold-QZZU-2066680-Pyrenacantha_malvifolia	33.18	422	257	25	9	412	1639	395	1e-56	203
PaASAT1|Ax39119	scaffold-AUIP-2130635-Phelline_lucida	32.24	425	260	28	9	412	32	1285	1e-56	201
PaASAT1|Ax39119	scaffold-JEXA-2009266-Impatiens_balsamifera	32.99	394	212	52	9	365	39	1175	3e-56	197
PaASAT1|Ax39119	scaffold-GFVW-2116915-Flaveria_pringlei-juvenile_leaf	32.49	434	253	40	9	412	159	1430	3e-56	199
PaASAT1|Ax39119	scaffold-RZSW-2078358-Flaveria_pringlei-mature_leaf	32.48	431	257	34	9	412	1360	89	3e-56	199
PaASAT1|Ax39119	scaffold-AQZD-2133533-AQZD-Flaveria_pringlei-2_samples_combined	32.49	434	253	40	9	412	159	1430	3e-56	199
PaASAT1|Ax39119	scaffold-YADI-2006494-Asclepias_syriaca	37.22	317	174	25	18	314	4	939	4e-56	194
PaASAT1|Ax39119	scaffold-GNPX-2012247-Oxera_neriifolia	31.34	402	246	30	9	394	1479	316	5e-56	199
PaASAT1|Ax39119	scaffold-DOVJ-2063440-Leontopodium_alpinum	32.29	415	251	30	9	399	1316	90	6e-56	197
PaASAT1|Ax39119	scaffold-PIYM-2081268-PIYM-Galax_urceolata-2_samples_combined	30	440	267	41	9	412	1606	302	7e-56	200
PaASAT1|Ax39119	scaffold-ZRIN-2004810-Uncarina_grandidieri	35.09	379	219	27	8	365	1408	290	7e-56	198
PaASAT1|Ax39119	scaffold-ADHK-2014077-Galax_urceolata-diploid	30	440	267	41	9	412	1606	302	7e-56	200
PaASAT1|Ax39119	scaffold-BOLZ-2170684-Atropa_belladonna	32.97	367	218	28	78	424	1	1077	7e-56	196
PaASAT1|Ax39119	scaffold-CLRW-2180478-Bacopa_caroliniana	30.63	431	270	29	6	412	122	1399	8e-56	199
PaASAT1|Ax39119	scaffold-QEHE-2002163-Rauvolfia_tetraphyla	32.39	423	244	42	9	399	1502	264	8e-56	198
PaASAT1|Ax39119	scaffold-QEHE-2002164-Rauvolfia_tetraphyla	32.39	423	244	42	9	399	1507	269	9e-56	198
PaASAT1|Ax39119	scaffold-WEAC-2012956-Strobilanthes_dyerianus	32.52	412	242	36	9	394	1354	149	1e-55	197
PaASAT1|Ax39119	scaffold-DSUV-2055900-Asclepia_curassavica	36.13	393	205	46	9	371	90	1220	1e-55	198
PaASAT1|Ax39119	scaffold-YSRZ-2089911-Fouqueria_macdougalli	31.63	430	251	43	11	412	1299	55	1e-55	196
PaASAT1|Ax39119	scaffold-IDGE-2000210-Heliotropium_racemosum	37.75	204	120	7	1	197	100	711	1e-55	136
PaASAT1|Ax39119	scaffold-IDGE-2000210-Heliotropium_racemosum	33.5	203	125	10	212	405	764	1369	1e-55	105
PaASAT1|Ax39119	scaffold-JBYE-2029219-Hedera_helix-ground_root	32.27	440	248	50	9	412	1343	66	2e-55	197
PaASAT1|Ax39119	scaffold-IHPC-2074770-Platycodon_grandiflorus	31.59	440	251	50	9	412	1642	365	2e-55	199
PaASAT1|Ax39119	scaffold-DUQG-2054015-Tanacetum_parthenium	31.85	405	235	41	9	382	151	1335	4e-55	198
PaASAT1|Ax39119	scaffold-SXML-2071581-Ilex_paraguariensis	31.21	423	251	40	9	399	1540	296	5e-55	197
PaASAT1|Ax39119	scaffold-OTAN-2000900-Deutzia_scabra	32.88	441	254	42	11	421	1641	355	5e-55	197
PaASAT1|Ax39119	scaffold-EDEQ-2012051-Wrightia_natalensis	33.1	420	245	36	9	399	335	1573	6e-55	199
PaASAT1|Ax39119	scaffold-YFQX-2066579-YFQX-Apocynum_androsaemifolium-2_samples_combined	41.07	280	142	23	130	390	4	831	7e-55	190
PaASAT1|Ax39119	scaffold-TQKZ-2014878-Angelica_archangelica	31.89	417	240	44	14	399	140	1351	8e-55	197
PaASAT1|Ax39119	scaffold-OUER-2025969-Heliotropium_convolvulaceum	31.83	289	177	20	139	408	933	70	1e-54	145
PaASAT1|Ax39119	scaffold-OUER-2025969-Heliotropium_convolvulaceum	41.8	122	66	5	1	121	1325	972	1e-54	92.4
PaASAT1|Ax39119	scaffold-SUVN-2046704-SUVN-Hedera_helix-2_samples_combined	34.04	329	191	26	9	318	165	1130	2e-54	187
PaASAT1|Ax39119	scaffold-SUVN-2046704-SUVN-Hedera_helix-2_samples_combined	34.18	79	51	1	330	408	1156	1389	2e-54	49.7
PaASAT1|Ax39119	scaffold-NGRR-2020959-Ternstroemia_gymnanthera	33.75	400	197	68	9	369	76	1188	3e-54	191
PaASAT1|Ax39119	scaffold-SALZ-2069518-Pittosporum_resiniferum-fruit	30.02	423	255	41	9	399	1346	105	3e-54	193
PaASAT1|Ax39119	scaffold-WSYE-2064333-Conzya_canadensis-glyphosate_suseptible	31.8	434	240	56	7	399	14	1270	3e-54	193
PaASAT1|Ax39119	scaffold-CLNU-2014848-Escallonia_sp._cv._Newport	31.37	424	259	32	4	399	433	1692	4e-54	196
PaASAT1|Ax39119	scaffold-IHPC-2013556-Platycodon_grandiflorus	32.55	427	262	26	9	412	126	1397	4e-54	195
PaASAT1|Ax39119	scaffold-NUSE-2064357-Conzya_canadensis-glyphosate_resistant	31.8	434	240	56	7	399	1414	158	4e-54	193
PaASAT1|Ax39119	scaffold-CWYJ-2002436-Heracleum_lanatum	30.59	438	261	43	6	412	371	1648	4e-54	198
PaASAT1|Ax39119	scaffold-YFQX-2004356-YFQX-Apocynum_androsaemifolium-2_samples_combined	41.42	169	92	7	9	172	96	596	4e-54	131
PaASAT1|Ax39119	scaffold-YFQX-2004356-YFQX-Apocynum_androsaemifolium-2_samples_combined	33.98	206	118	18	173	360	598	1215	4e-54	104
PaASAT1|Ax39119	scaffold-GNPX-2012249-Oxera_neriifolia	30.64	408	253	30	9	400	1588	407	4e-54	195
PaASAT1|Ax39119	scaffold-MHYG-2084085-MHYG-Conzya_canadensis-2_samples_combined	31.8	434	240	56	7	399	18	1274	5e-54	193
PaASAT1|Ax39119	scaffold-TQKZ-2061563-Angelica_archangelica	30.59	438	244	60	6	397	1523	252	5e-54	194
PaASAT1|Ax39119	scaffold-IZNU-2044349-Ipomoea_lobata	31.54	409	259	21	9	399	48	1265	6e-54	193
PaASAT1|Ax39119	scaffold-GGJD-2022570-Strychnos_spinosa	39.16	286	151	23	145	415	887	54	8e-54	187
PaASAT1|Ax39119	scaffold-ZRIN-2017043-Uncarina_grandidieri	33.02	421	243	39	1	394	1423	197	8e-54	192
PaASAT1|Ax39119	scaffold-HUSX-2053801-Roridula_gorgonias	31.19	420	267	22	10	419	7	1230	2e-53	192
PaASAT1|Ax39119	scaffold-YFQX-2069059-YFQX-Apocynum_androsaemifolium-2_samples_combined	30.77	416	253	35	9	394	57	1289	2e-53	192
PaASAT1|Ax39119	scaffold-CLNU-2064459-Escallonia_sp._cv._Newport	31.02	432	267	31	9	421	82	1341	2e-53	192
PaASAT1|Ax39119	scaffold-EDBB-2087346-Polyscias_fruticosa	30.48	420	260	32	9	399	168	1418	2e-53	192
PaASAT1|Ax39119	scaffold-NTEO-2002651-Pittosporum_sahnianum	38.1	315	175	20	9	304	1081	140	2e-53	190
PaASAT1|Ax39119	scaffold-EDEQ-2070163-Wrightia_natalensis	40.98	266	143	14	9	266	793	14	3e-53	185
PaASAT1|Ax39119	scaffold-IDGE-2000209-Heliotropium_racemosum	37.75	204	120	7	1	197	100	711	4e-53	136
PaASAT1|Ax39119	scaffold-IDGE-2000209-Heliotropium_racemosum	33.33	207	119	19	213	405	767	1372	4e-53	97.1
PaASAT1|Ax39119	scaffold-RTNA-2089608-Oxera_pulchella	32.71	373	226	25	9	368	73	1155	4e-53	190
PaASAT1|Ax39119	scaffold-DUQG-2053842-Tanacetum_parthenium	32.08	427	250	40	9	399	1522	254	4e-53	192
PaASAT1|Ax39119	scaffold-JCLQ-2004912-Apocynum_androsaemifolium-A	31.13	424	250	42	1	394	107	1342	5e-53	191
PaASAT1|Ax39119	scaffold-UFQC-2056011-Apocynum_androsaemifolium-B	30.99	426	252	42	1	396	125	1366	5e-53	191
PaASAT1|Ax39119	scaffold-YFQX-2008346-YFQX-Apocynum_androsaemifolium-2_samples_combined	30.99	426	252	42	1	396	1406	165	6e-53	191
PaASAT1|Ax39119	scaffold-XAYK-2019547-XAYK-Kigelia_africana-2_samples_combined	31.59	421	257	31	9	412	1590	370	6e-53	192
PaASAT1|Ax39119	scaffold-QKEI-2055287-Kigelia_africana-B	31.59	421	257	31	9	412	29	1249	6e-53	192
PaASAT1|Ax39119	scaffold-WUZV-2064356-Lindenbergia_philippensis-flower	32.88	441	257	39	1	412	1668	376	7e-53	192
PaASAT1|Ax39119	scaffold-EITK-2011576-Hedera_helix-aerial_root	32.39	426	257	31	9	412	51	1301	7e-53	190
PaASAT1|Ax39119	scaffold-JCLQ-2044736-Apocynum_androsaemifolium-A	30.53	416	254	35	9	394	1446	214	7e-53	191
PaASAT1|Ax39119	scaffold-ZJRC-2213576-ZJRC-Sambucus_canadensis-2_samples_combined	29.76	410	265	23	9	399	1446	229	8e-53	191
PaASAT1|Ax39119	scaffold-QRNU-2172129-Sambucus_canadensis-B	29.76	410	265	23	9	399	1446	229	8e-53	191
PaASAT1|Ax39119	scaffold-FFFY-2001550-Valeriana_officianalis	34.26	394	221	38	29	399	1	1137	8e-53	189
PaASAT1|Ax39119	scaffold-FFFY-2001549-Valeriana_officianalis	34.26	394	221	38	29	399	1	1137	8e-53	189
PaASAT1|Ax39119	scaffold-EJCM-2076197-EJCM-Lindenbergia_philippensis-2_samples_combined	32.88	441	257	39	1	412	1717	425	9e-53	192
PaASAT1|Ax39119	scaffold-CLNU-2014057-Escallonia_sp._cv._Newport	34.82	382	220	29	9	365	501	1634	1e-52	192
PaASAT1|Ax39119	scaffold-MMJI-2090003-Lactuca_graminifolia-B	30.51	413	262	25	9	397	49	1284	1e-52	188
PaASAT1|Ax39119	scaffold-VTOK-2103111-Orobanche_fasciculata-flower_buds	29.95	414	257	33	9	394	1503	277	1e-52	190
PaASAT1|Ax39119	scaffold-JPDJ-2065870-Symplocus_sp.	32.8	436	259	34	1	415	53	1321	2e-52	189
PaASAT1|Ax39119	scaffold-TPEM-2145206-Platyspermation_crassifolium	34.12	340	202	22	9	328	47	1060	2e-52	187
PaASAT1|Ax39119	scaffold-OINM-2146269-Hydrocotyle_umbellata	32.07	421	247	39	10	405	45	1265	2e-52	189
PaASAT1|Ax39119	scaffold-MDJK-2148536-MDJK-Heliotropium_texanum-2_samples_combined	30.49	410	252	33	9	394	1397	195	2e-52	189
PaASAT1|Ax39119	scaffold-GNPX-2107936-Oxera_neriifolia	32.26	372	229	23	9	368	70	1152	2e-52	189
PaASAT1|Ax39119	scaffold-YFQX-2001936-YFQX-Apocynum_androsaemifolium-2_samples_combined	42.08	240	129	10	5	235	156	872	2e-52	184
PaASAT1|Ax39119	scaffold-ZGDS-2089088-Lactuca_graminifolia-A	30.51	413	262	25	9	397	79	1314	2e-52	188
PaASAT1|Ax39119	scaffold-UCNM-2056909-Ajuga_reptans	30.65	398	254	22	9	394	1351	188	2e-52	189
PaASAT1|Ax39119	scaffold-SXML-2005309-Ilex_paraguariensis	30.18	434	270	33	9	422	137	1399	2e-52	189
PaASAT1|Ax39119	scaffold-GRFT-2073331-Buddleja_sp.	31.18	449	266	43	1	412	1625	297	2e-52	191
PaASAT1|Ax39119	scaffold-RFSD-2117551-RFSD-Lactuca_graminifolia-2_samples_combined	30.51	413	262	25	9	397	96	1331	3e-52	188
PaASAT1|Ax39119	scaffold-PHOQ-2097539-Orobanche_fasciculata-stem	29.95	414	257	33	9	394	1550	324	3e-52	190
PaASAT1|Ax39119	scaffold-TORX-2019676-Olea_europaea	31.18	417	254	33	14	410	187	1398	3e-52	190
PaASAT1|Ax39119	scaffold-VYDM-2130556-VYDM-Orobanche_fasciculata-2_samples_combined	29.95	414	257	33	9	394	1550	324	3e-52	190
PaASAT1|Ax39119	scaffold-AFQQ-2009204-Inula_helenium	32	425	257	32	9	416	99	1328	3e-52	188
PaASAT1|Ax39119	scaffold-GUMF-2114586-Anthemis_tinctoria	32.62	423	241	44	9	413	83	1273	3e-52	188
PaASAT1|Ax39119	scaffold-GNPX-2012248-Oxera_neriifolia	31.02	403	246	32	9	394	1479	316	3e-52	189
PaASAT1|Ax39119	scaffold-EQDA-2011901-Salvia_spp.	31.71	410	246	34	9	394	10	1209	4e-52	187
PaASAT1|Ax39119	scaffold-ERWT-2043870-Ipomoea_coccinea	29.9	408	267	19	9	399	1334	117	5e-52	188
PaASAT1|Ax39119	scaffold-WOHL-2179691-WOHL-Schlegelia_parasitica-2_samples_combined	32.2	413	238	42	9	394	110	1303	5e-52	189
PaASAT1|Ax39119	scaffold-GAKQ-2021524-Schlegelia_parasitica	32.2	413	238	42	9	394	109	1302	5e-52	189
PaASAT1|Ax39119	scaffold-UEEN-2163501-Forestiera_segregata	31.92	426	257	33	10	419	1556	330	6e-52	189
PaASAT1|Ax39119	scaffold-UFQC-2004443-Apocynum_androsaemifolium-B	41.84	239	129	10	5	234	156	869	9e-52	182
PaASAT1|Ax39119	scaffold-DIHD-2095161-Heliotropium_tenellum-juvenile_leaf	34.69	343	206	18	87	415	3	1019	1e-51	185
PaASAT1|Ax39119	scaffold-GNPX-2019015-Oxera_neriifolia	32.51	403	239	33	9	394	68	1228	1e-51	187
PaASAT1|Ax39119	scaffold-CLMX-2009554-Escallonia_rubra	30.79	432	268	31	9	421	94	1353	1e-51	187
PaASAT1|Ax39119	scaffold-FFFY-2014412-Valeriana_officianalis	29.48	407	261	26	6	399	3	1184	2e-51	189
PaASAT1|Ax39119	scaffold-WRPP-2129258-Synsepalum_dulcificum	30.65	434	265	36	9	418	1592	327	2e-51	188
PaASAT1|Ax39119	scaffold-NGRR-2024459-Ternstroemia_gymnanthera	30.5	423	249	45	6	394	1416	181	3e-51	186
PaASAT1|Ax39119	scaffold-WXVX-2075214-Ledum_palustre	33.84	393	213	47	9	365	64	1209	3e-51	187
PaASAT1|Ax39119	scaffold-GRFT-2019632-Buddleja_sp.	30.29	449	252	61	9	421	73	1344	3e-51	185
PaASAT1|Ax39119	scaffold-HGSM-2070490-Gelsemium_sempervirens	31.69	445	262	42	9	422	1435	134	4e-51	186
PaASAT1|Ax39119	scaffold-UMUL-2086675-Paulownia_fargesii	31.18	417	254	33	9	399	1518	289	4e-51	187
PaASAT1|Ax39119	scaffold-KTAR-2140062-Chionanthus_retusus	30.05	416	260	31	14	410	81	1292	5e-51	185
PaASAT1|Ax39119	scaffold-GRFT-2000868-Buddleja_sp.	29.07	454	270	52	9	417	71	1411	6e-51	186
PaASAT1|Ax39119	scaffold-TAGM-2002090-Melissa_officinalis	30	410	258	29	6	394	35	1240	6e-51	186
PaASAT1|Ax39119	scaffold-RFSD-2117539-RFSD-Lactuca_graminifolia-2_samples_combined	32.72	434	224	68	9	396	1273	38	6e-51	184
PaASAT1|Ax39119	scaffold-EMAL-2013448-Ehretia_acuminata	30.16	451	280	35	9	430	161	1495	6e-51	189
PaASAT1|Ax39119	scaffold-NUSE-2064428-Conzya_canadensis-glyphosate_resistant	31.7	448	271	35	9	429	46	1365	7e-51	185
PaASAT1|Ax39119	scaffold-MHYG-2084131-MHYG-Conzya_canadensis-2_samples_combined	31.7	448	271	35	9	429	1397	78	7e-51	185

## Sheet: PaASAT2
PaASAT2|Ax36474	scaffold-BOLZ-2171211-Atropa_belladonna	77.96	431	92	3	1	430	1520	234	0	683
PaASAT2|Ax36474	scaffold-LQJY-2007343-Solanum_xanthocarpum	45.18	436	219	20	1	423	58	1344	1e-112	346
PaASAT2|Ax36474	scaffold-BOLZ-2171050-Atropa_belladonna	42.15	427	229	18	12	427	72	1331	7e-103	320
PaASAT2|Ax36474	scaffold-EMAL-2005913-Ehretia_acuminata	41.18	442	233	27	1	426	85	1377	4e-98	308
PaASAT2|Ax36474	scaffold-GHLP-2057362-Solanum_dulcamara	39.5	443	238	30	1	425	1424	132	5e-98	308
PaASAT2|Ax36474	scaffold-MKZR-2110551-Nicotiana_sylvestris	42.39	401	213	18	38	425	1456	269	9e-97	305
PaASAT2|Ax36474	scaffold-DKFZ-2068695-Mertensia_paniculata	37.64	433	244	26	8	424	1321	53	7e-92	291
PaASAT2|Ax36474	scaffold-LQJY-2082072-Solanum_xanthocarpum	40.89	450	223	43	1	425	1856	561	7e-91	293
PaASAT2|Ax36474	scaffold-DKFZ-2016727-Mertensia_paniculata	39.58	432	243	18	1	424	201	1466	3e-90	288
PaASAT2|Ax36474	scaffold-LQJY-2080100-Solanum_xanthocarpum	38.19	432	242	25	6	428	9	1256	7e-88	281
PaASAT2|Ax36474	scaffold-IPPG-2059346-Heliotropium_filiforme-juvenile_leaf	38.12	446	238	38	1	425	152	1438	3e-87	283
PaASAT2|Ax36474	scaffold-OEKO-2015565-OEKO-Heliotropium_filiforme-2_samples_combined	38.12	446	238	38	1	425	59	1345	4e-87	283
PaASAT2|Ax36474	scaffold-OEKO-2015565-OEKO-Heliotropium_filiforme-2_samples_combined	35.9	78	49	1	348	424	1817	1584	1e-05	55.1
PaASAT2|Ax36474	scaffold-JNVS-2050220-Datura_metel	37.16	436	237	37	9	425	107	1360	2e-86	278
PaASAT2|Ax36474	scaffold-EMAL-2005912-Ehretia_acuminata	39.6	452	231	42	1	426	48	1355	2e-86	278
PaASAT2|Ax36474	scaffold-ABEH-2013086-Heliotropium_greggii	38.05	452	251	29	1	427	24	1367	3e-86	278
PaASAT2|Ax36474	scaffold-NIGS-2110308-Heliotropium_karwinsky	39.11	450	235	39	1	428	1447	149	3e-85	276
PaASAT2|Ax36474	scaffold-BOLZ-2038238-Atropa_belladonna	35.76	439	254	28	6	424	1395	103	7e-85	274
PaASAT2|Ax36474	scaffold-JCLQ-2044373-Apocynum_androsaemifolium-A	37.59	431	249	20	6	424	1338	70	4e-84	271
PaASAT2|Ax36474	scaffold-XVRU-2029902-XVRU-Heliotropium_calcicola-3_samples_combined	37.59	439	253	21	1	425	65	1360	4e-84	271
PaASAT2|Ax36474	scaffold-UFQC-2004442-Apocynum_androsaemifolium-B	37.91	430	249	18	6	424	159	1427	1e-83	271
PaASAT2|Ax36474	scaffold-YFQX-2001937-YFQX-Apocynum_androsaemifolium-2_samples_combined	37.91	430	249	18	6	424	159	1427	3e-83	271
PaASAT2|Ax36474	scaffold-NIGS-2110309-Heliotropium_karwinsky	38.22	437	243	27	1	424	1451	183	2e-82	268
PaASAT2|Ax36474	scaffold-XVRU-2029900-XVRU-Heliotropium_calcicola-3_samples_combined	36.61	437	257	20	1	425	65	1351	4e-82	266
PaASAT2|Ax36474	scaffold-VJSJ-2026958-Heliotropium_calcicola	38.78	441	240	30	1	424	1493	210	6e-82	268
PaASAT2|Ax36474	scaffold-XVRU-2046087-XVRU-Heliotropium_calcicola-3_samples_combined	38.78	441	240	30	1	424	1493	210	1e-81	268
PaASAT2|Ax36474	scaffold-BOLZ-2029346-Atropa_belladonna	44.07	329	168	16	1	324	24	977	2e-81	263
PaASAT2|Ax36474	scaffold-BOLZ-2029346-Atropa_belladonna	36.84	76	46	2	341	414	1016	1243	5e-07	59.3
PaASAT2|Ax36474	scaffold-OUER-2027258-Heliotropium_convolvulaceum	38.07	415	225	32	25	424	1282	89	3e-81	263
PaASAT2|Ax36474	scaffold-OSMU-2080126-Lycium_sp.	36.22	450	247	40	6	425	108	1427	2e-80	265
PaASAT2|Ax36474	scaffold-OUER-2008485-Heliotropium_convolvulaceum	37.27	440	256	20	1	426	2058	757	5e-80	267
PaASAT2|Ax36474	scaffold-MZOB-2012709-Heliotropium_mendocinum	37	427	247	22	1	418	42	1283	1e-79	258
PaASAT2|Ax36474	scaffold-NIGS-2002637-Heliotropium_karwinsky	36.49	433	255	20	5	425	1	1275	2e-78	257
PaASAT2|Ax36474	scaffold-SXML-2016065-Ilex_paraguariensis	36.45	439	256	23	1	424	117	1409	7e-78	258
PaASAT2|Ax36474	scaffold-DKFZ-2068969-Mertensia_paniculata	35.84	466	243	56	2	424	51	1409	2e-77	256
PaASAT2|Ax36474	scaffold-IDGE-2106182-Heliotropium_racemosum	36.84	437	255	21	1	425	3070	1787	3e-76	263
PaASAT2|Ax36474	scaffold-BOLZ-2029345-Atropa_belladonna	46.4	278	136	13	1	273	24	833	3e-76	241
PaASAT2|Ax36474	scaffold-BOLZ-2029345-Atropa_belladonna	31.72	145	95	4	287	427	866	1300	3e-76	68.6
PaASAT2|Ax36474	scaffold-JWEY-2020245-Heliotropium_sp.	37.25	400	232	19	42	427	1374	190	4e-76	250
PaASAT2|Ax36474	scaffold-IDGE-2105614-Heliotropium_racemosum	36.99	438	256	20	1	424	50	1345	1e-75	249
PaASAT2|Ax36474	scaffold-YFQX-2068450-YFQX-Apocynum_androsaemifolium-2_samples_combined	34.83	422	252	23	7	418	1286	60	3e-74	245
PaASAT2|Ax36474	scaffold-JCLQ-2044022-Apocynum_androsaemifolium-A	34.83	422	252	23	7	418	11	1237	4e-74	244
PaASAT2|Ax36474	scaffold-KPUM-2102358-Exacum_affine	33.18	425	271	13	12	428	1573	314	8e-74	249
PaASAT2|Ax36474	scaffold-HLJG-2026155-Viburnum_odoratissimum	35.32	436	245	37	8	423	108	1364	2e-73	247
PaASAT2|Ax36474	scaffold-BFJL-2023027-Cornus_floridana	34.81	428	260	19	8	424	1659	400	2e-73	246
PaASAT2|Ax36474	scaffold-SNBI-2012701-Sambucus_canadensis	35.8	433	241	37	7	424	1403	171	8e-73	243
PaASAT2|Ax36474	scaffold-HGSM-2070554-Gelsemium_sempervirens	35.15	441	257	29	1	424	1391	105	3e-72	242
PaASAT2|Ax36474	scaffold-VJSJ-2029346-Heliotropium_calcicola	37.32	418	225	37	28	424	1	1206	5e-72	241
PaASAT2|Ax36474	scaffold-XVRU-2171375-XVRU-Heliotropium_calcicola-3_samples_combined	37.32	418	225	37	28	424	1478	273	5e-72	241
PaASAT2|Ax36474	scaffold-IDGE-2025815-Heliotropium_racemosum	35.16	438	261	23	1	424	1450	164	7e-71	239
PaASAT2|Ax36474	scaffold-JGYZ-2004855-Holarrhena_pubescens	39.25	372	202	24	45	398	6	1103	3e-70	234
PaASAT2|Ax36474	scaffold-IDGE-2009207-Heliotropium_racemosum	34.74	449	259	34	1	424	1431	112	6e-68	229
PaASAT2|Ax36474	scaffold-GGJD-2123219-Strychnos_spinosa	33.64	428	259	25	8	424	1499	258	2e-67	229
PaASAT2|Ax36474	scaffold-BNTL-2025431-Souroubea_exauriculata	32.72	434	262	30	6	423	78	1337	1e-66	227
PaASAT2|Ax36474	scaffold-HLJG-2153394-Viburnum_odoratissimum	31.55	431	263	32	8	424	1444	206	6e-66	226
PaASAT2|Ax36474	scaffold-DAAD-2042705-Ardisia_revoluta	33.94	436	263	25	1	424	1546	278	9e-66	226
PaASAT2|Ax36474	scaffold-DTOA-2092303-Maesa_lanceolata	32.64	432	271	20	5	426	1287	22	2e-65	222
PaASAT2|Ax36474	scaffold-FXGI-2054068-Stylidium_adnatum	34.63	436	255	30	8	424	176	1450	3e-65	224
PaASAT2|Ax36474	scaffold-HLJG-2153453-Viburnum_odoratissimum	35.73	431	236	41	2	415	1391	171	5e-65	224
PaASAT2|Ax36474	scaffold-UOYN-2041261-Catharanthus_roseus	32.57	436	261	33	1	424	1325	81	7e-65	221
PaASAT2|Ax36474	scaffold-VKJD-2131033-VKJD-Maesa_lanceolata-2_samples_combined	32.64	432	271	20	5	426	88	1353	8e-65	222
PaASAT2|Ax36474	scaffold-MZOB-2011194-Heliotropium_mendocinum	46.19	197	100	6	1	194	68	649	1e-64	177
PaASAT2|Ax36474	scaffold-MZOB-2011194-Heliotropium_mendocinum	31.22	221	139	13	214	426	714	1361	1e-64	94.4
PaASAT2|Ax36474	scaffold-GSZA-2011755-Lonicera_japonica	33.95	433	249	37	5	422	7	1239	2e-64	223
PaASAT2|Ax36474	scaffold-ZJRC-2019034-ZJRC-Sambucus_canadensis-2_samples_combined	32.46	422	252	33	15	424	1560	358	3e-64	223
PaASAT2|Ax36474	scaffold-HLJG-2025035-Viburnum_odoratissimum	32.94	419	251	30	5	410	161	1366	4e-64	220
PaASAT2|Ax36474	scaffold-EITK-2034113-Hedera_helix-aerial_root	33.56	435	264	25	5	426	153	1421	6e-64	221
PaASAT2|Ax36474	scaffold-FFFY-2006726-Valeriana_officianalis	32.28	443	253	47	2	426	1400	159	9e-64	220
PaASAT2|Ax36474	scaffold-QIKZ-2033706-Griselinia_racemosa	33.64	434	267	21	2	424	1547	276	1e-63	221
PaASAT2|Ax36474	scaffold-QEHE-2010212-Rauvolfia_tetraphyla	36.83	391	218	29	42	423	5	1117	7e-63	214
PaASAT2|Ax36474	scaffold-QEHE-2024055-Rauvolfia_tetraphyla	33.41	434	258	31	1	424	35	1273	2e-62	214
PaASAT2|Ax36474	scaffold-ZJRC-2003755-ZJRC-Sambucus_canadensis-2_samples_combined	34.58	402	226	37	38	424	291	1430	5e-62	216
PaASAT2|Ax36474	scaffold-IHPC-2074225-Platycodon_grandiflorus	33.18	449	252	48	8	424	76	1374	7e-62	215
PaASAT2|Ax36474	scaffold-AUIP-2130635-Phelline_lucida	32.49	437	275	20	3	426	14	1303	7e-62	215
PaASAT2|Ax36474	scaffold-NTEO-2067838-Pittosporum_sahnianum	33.64	434	268	20	1	424	1455	184	8e-62	214
PaASAT2|Ax36474	scaffold-EDBB-2086749-Polyscias_fruticosa	33.03	433	266	24	5	424	10	1275	9e-62	213
PaASAT2|Ax36474	scaffold-UOYN-2041939-Catharanthus_roseus	35.06	445	241	48	9	424	42	1319	6e-61	212
PaASAT2|Ax36474	scaffold-QEHE-2092064-Rauvolfia_tetraphyla	33.64	431	258	28	2	424	172	1404	7e-61	212
PaASAT2|Ax36474	scaffold-CAQZ-2018164-Symphoricarpos_sp.	33.41	452	250	51	1	424	1507	221	8e-61	213
PaASAT2|Ax36474	scaffold-XQRV-2014491-XQRV-Ipomoea_purpurea-2_samples_combined	43.63	259	130	16	5	255	24	776	9e-61	204
PaASAT2|Ax36474	scaffold-HANM-2069259-Pholisma_arenarium	44.44	279	132	23	12	273	3	821	1e-60	204
PaASAT2|Ax36474	scaffold-NGRR-2024947-Ternstroemia_gymnanthera	32.56	433	272	20	8	425	1568	285	1e-60	212
PaASAT2|Ax36474	scaffold-XVRU-2029903-XVRU-Heliotropium_calcicola-3_samples_combined	34.79	365	219	19	75	425	3	1082	3e-60	207
PaASAT2|Ax36474	scaffold-IHPC-2074198-Platycodon_grandiflorus	31.76	444	257	46	6	422	1386	112	5e-60	210
PaASAT2|Ax36474	scaffold-DSUV-2055900-Asclepia_curassavica	35.01	437	259	25	4	424	75	1358	7e-60	209
PaASAT2|Ax36474	scaffold-LQJY-2001565-Solanum_xanthocarpum	31.77	299	180	24	141	422	918	43	8e-60	144
PaASAT2|Ax36474	scaffold-LQJY-2001565-Solanum_xanthocarpum	44.17	120	63	4	14	131	1286	933	8e-60	110
PaASAT2|Ax36474	scaffold-QEHE-2002163-Rauvolfia_tetraphyla	33.79	438	261	29	8	424	1505	216	2e-59	208
PaASAT2|Ax36474	scaffold-QEHE-2002164-Rauvolfia_tetraphyla	33.79	438	261	29	8	424	1510	221	2e-59	208
PaASAT2|Ax36474	scaffold-BOLZ-2170684-Atropa_belladonna	35.28	360	210	23	81	425	1	1056	4e-59	204
PaASAT2|Ax36474	scaffold-JGYZ-2045647-Holarrhena_pubescens	33.26	439	262	31	8	424	1758	469	4e-59	209
PaASAT2|Ax36474	scaffold-SALZ-2069518-Pittosporum_resiniferum-fruit	31.65	436	262	36	4	414	1361	87	8e-59	206
PaASAT2|Ax36474	scaffold-QIKZ-2027267-Griselinia_racemosa	34.16	404	244	22	34	424	1403	219	1e-58	209
PaASAT2|Ax36474	scaffold-IDGE-2009208-Heliotropium_racemosum	33.72	427	249	34	23	424	1365	112	1e-58	204
PaASAT2|Ax36474	scaffold-JPDJ-2001077-Symplocus_sp.	32.02	456	266	44	1	424	146	1477	3e-58	205
PaASAT2|Ax36474	scaffold-EMAL-2018618-Ehretia_acuminata	36.84	323	188	16	1	309	964	2	4e-58	199
PaASAT2|Ax36474	scaffold-JCLQ-2005855-Apocynum_androsaemifolium-A	32.95	434	270	21	9	424	1542	250	5e-58	205
PaASAT2|Ax36474	scaffold-BMSE-2064351-Senecio_rowleyanus	32.95	434	250	41	7	423	118	1347	1e-57	203
PaASAT2|Ax36474	scaffold-UFQC-2006897-Apocynum_androsaemifolium-B	32.64	435	272	21	8	424	42	1337	1e-57	204
PaASAT2|Ax36474	scaffold-YSRZ-2089911-Fouqueria_macdougalli	33.26	430	260	27	11	424	1299	43	2e-57	201
PaASAT2|Ax36474	scaffold-YFQX-2069059-YFQX-Apocynum_androsaemifolium-2_samples_combined	31.05	438	268	34	2	414	36	1322	3e-57	202
PaASAT2|Ax36474	scaffold-SALZ-2005021-Pittosporum_resiniferum-fruit	31.89	439	264	35	8	424	1354	77	3e-57	202
PaASAT2|Ax36474	scaffold-JGYZ-2000371-Holarrhena_pubescens	37.2	336	182	29	1	321	178	1143	4e-57	199
PaASAT2|Ax36474	scaffold-IPPG-2009446-Heliotropium_filiforme-juvenile_leaf	32.29	446	265	37	3	424	53	1351	4e-57	201
PaASAT2|Ax36474	scaffold-XKVX-2048834-Heliotropium_filiforme-mature_leaf	32.29	446	265	37	3	424	1418	120	5e-57	201
PaASAT2|Ax36474	scaffold-QRNU-2171255-Sambucus_canadensis-B	34.39	378	214	34	62	424	1	1077	5e-57	200
PaASAT2|Ax36474	scaffold-OEKO-2063664-OEKO-Heliotropium_filiforme-2_samples_combined	32.29	446	265	37	3	424	1418	120	5e-57	201
PaASAT2|Ax36474	scaffold-OSMU-2076670-Lycium_sp.	37.66	316	167	30	121	421	903	1	6e-57	196
PaASAT2|Ax36474	scaffold-OINM-2146269-Hydrocotyle_umbellata	30.56	445	270	39	4	427	27	1307	9e-57	201
PaASAT2|Ax36474	scaffold-JCLQ-2044736-Apocynum_androsaemifolium-A	31.03	435	266	34	5	414	1458	181	1e-56	200
PaASAT2|Ax36474	scaffold-TQKZ-2061563-Angelica_archangelica	31.28	454	267	45	5	423	1532	201	2e-56	201
PaASAT2|Ax36474	scaffold-YFQX-2001936-YFQX-Apocynum_androsaemifolium-2_samples_combined	44.21	242	130	5	6	246	159	872	2e-56	194
PaASAT2|Ax36474	scaffold-EMAL-2013448-Ehretia_acuminata	31.75	441	263	38	5	419	149	1435	3e-56	203
PaASAT2|Ax36474	scaffold-DOVJ-2063440-Leontopodium_alpinum	32.35	442	262	37	6	424	1325	42	4e-56	198
PaASAT2|Ax36474	scaffold-ECTD-2028993-Gentiana_acaulis	31.7	429	264	29	3	415	1464	217	4e-56	199
PaASAT2|Ax36474	scaffold-JTRM-2091156-Dipsacus_sativum	32.25	431	245	47	8	419	126	1334	4e-56	198
PaASAT2|Ax36474	scaffold-UFHF-2012590-Galax_urceolata-tetraploid	30.22	450	277	37	5	424	1375	47	5e-56	198
PaASAT2|Ax36474	scaffold-SXML-2071581-Ilex_paraguariensis	32.2	441	272	27	5	424	1552	248	1e-55	199
PaASAT2|Ax36474	scaffold-AFQQ-2009204-Inula_helenium	31.26	435	253	46	8	422	96	1322	2e-55	197
PaASAT2|Ax36474	scaffold-WEQK-2067018-Centella_asiatica	32.05	440	275	24	5	424	158	1465	2e-55	198
PaASAT2|Ax36474	scaffold-UFQC-2004443-Apocynum_androsaemifolium-B	43.98	241	130	5	6	245	159	869	2e-55	191
PaASAT2|Ax36474	scaffold-MZOB-2004511-Heliotropium_mendocinum	34.1	390	227	30	1	371	2	1138	2e-55	194
PaASAT2|Ax36474	scaffold-VJSJ-2024352-Heliotropium_calcicola	34.66	352	212	18	86	425	1102	65	2e-55	194
PaASAT2|Ax36474	scaffold-BNTL-2006498-Souroubea_exauriculata	31.99	447	269	35	1	429	26	1315	3e-55	198
PaASAT2|Ax36474	scaffold-EDEQ-2069431-Wrightia_natalensis	43.04	230	120	11	8	231	40	714	4e-55	189
PaASAT2|Ax36474	scaffold-GGJD-2020259-Strychnos_spinosa	31.81	437	271	27	8	424	339	1628	6e-55	200
PaASAT2|Ax36474	scaffold-CLNU-2064459-Escallonia_sp._cv._Newport	30.68	440	267	38	6	426	73	1335	6e-55	196
PaASAT2|Ax36474	scaffold-ADHK-2014077-Galax_urceolata-diploid	30.29	449	276	37	6	424	1615	290	9e-55	197
PaASAT2|Ax36474	scaffold-PIYM-2081268-PIYM-Galax_urceolata-2_samples_combined	30.29	449	276	37	6	424	1615	290	1e-54	197
PaASAT2|Ax36474	scaffold-OTAN-2000900-Deutzia_scabra	32.54	421	262	22	11	424	1641	424	1e-54	196
PaASAT2|Ax36474	scaffold-WUZV-2064356-Lindenbergia_philippensis-flower	32.05	443	271	30	3	424	1665	364	1e-54	197
PaASAT2|Ax36474	scaffold-YFQX-2009828-YFQX-Apocynum_androsaemifolium-2_samples_combined	32.86	420	261	21	9	410	1546	296	1e-54	196
PaASAT2|Ax36474	scaffold-EDEQ-2012051-Wrightia_natalensis	31.28	438	272	29	8	424	332	1621	1e-54	198
PaASAT2|Ax36474	scaffold-EJCM-2076197-EJCM-Lindenbergia_philippensis-2_samples_combined	32.05	443	271	30	3	424	1714	413	2e-54	197
PaASAT2|Ax36474	scaffold-GUMF-2114586-Anthemis_tinctoria	30.59	438	253	51	7	422	77	1303	2e-54	194
PaASAT2|Ax36474	scaffold-YFQX-2069168-YFQX-Apocynum_androsaemifolium-2_samples_combined	29.44	428	274	28	5	414	17	1270	2e-54	195
PaASAT2|Ax36474	scaffold-JCLQ-2044840-Apocynum_androsaemifolium-A	29.44	428	274	28	5	414	1525	272	2e-54	195
PaASAT2|Ax36474	scaffold-AJFN-2024153-Mydocarpus_sp.	30.63	431	272	27	5	414	154	1428	2e-54	194
PaASAT2|Ax36474	scaffold-MDJK-2148560-MDJK-Heliotropium_texanum-2_samples_combined	30.53	452	266	48	3	424	30	1331	3e-54	194
PaASAT2|Ax36474	scaffold-CLMX-2009554-Escallonia_rubra	31.29	441	263	40	6	426	85	1347	3e-54	194
PaASAT2|Ax36474	scaffold-JGYZ-2001414-Holarrhena_pubescens	37.09	337	188	24	3	321	1081	89	4e-54	191
PaASAT2|Ax36474	scaffold-UEEN-2163506-Forestiera_segregata	30.75	426	266	29	5	414	1470	232	6e-54	194
PaASAT2|Ax36474	scaffold-SXML-2005309-Ilex_paraguariensis	31.52	441	268	34	6	429	128	1399	7e-54	193
PaASAT2|Ax36474	scaffold-XKVX-2000295-Heliotropium_filiforme-mature_leaf	42.97	263	121	29	1	249	59	802	8e-54	194
PaASAT2|Ax36474	scaffold-XKVX-2000295-Heliotropium_filiforme-mature_leaf	30.46	197	128	9	236	425	756	1340	5e-18	94
PaASAT2|Ax36474	scaffold-UMUL-2086675-Paulownia_fargesii	30.57	435	276	26	8	424	1521	241	9e-54	194
PaASAT2|Ax36474	scaffold-YADI-2001729-Asclepias_syriaca	32.58	396	237	30	45	424	1279	134	9e-54	191
PaASAT2|Ax36474	scaffold-TQKZ-2014878-Angelica_archangelica	31.12	437	258	43	14	424	140	1399	1e-53	194
PaASAT2|Ax36474	scaffold-SUVN-2046704-SUVN-Hedera_helix-2_samples_combined	36	325	193	15	5	321	153	1106	1e-53	180
PaASAT2|Ax36474	scaffold-SUVN-2046704-SUVN-Hedera_helix-2_samples_combined	28.74	87	61	1	341	426	1159	1419	1e-53	54.3
PaASAT2|Ax36474	scaffold-JPDJ-2012875-Symplocus_sp.	32.13	445	266	36	5	423	63	1367	1e-53	194
PaASAT2|Ax36474	scaffold-OEKO-2061978-OEKO-Heliotropium_filiforme-2_samples_combined	38.87	319	163	32	124	424	1068	154	1e-53	189
PaASAT2|Ax36474	scaffold-GSZA-2071698-Lonicera_japonica	35.91	337	203	13	1	330	144	1136	2e-53	189
PaASAT2|Ax36474	scaffold-JGYZ-2044690-Holarrhena_pubescens	30.23	440	274	33	5	427	95	1366	6e-53	191
PaASAT2|Ax36474	scaffold-SNBI-2005428-Sambucus_canadensis	35.95	242	140	15	15	252	1352	660	8e-53	155
PaASAT2|Ax36474	scaffold-SNBI-2005428-Sambucus_canadensis	28.99	169	109	11	257	424	613	137	8e-53	76.3
PaASAT2|Ax36474	scaffold-AUIP-2018860-Phelline_lucida	31.45	442	275	28	9	424	230	1549	1e-52	192
PaASAT2|Ax36474	scaffold-GGJD-2020258-Strychnos_spinosa	31.87	433	268	27	12	424	141	1418	1e-52	192
PaASAT2|Ax36474	scaffold-EYKJ-2064539-Silybum_marianum	31	442	281	24	3	424	1330	17	2e-52	188
PaASAT2|Ax36474	scaffold-ASMV-2000922-Ilex_vomitoria	30.96	449	275	35	2	424	236	1555	2e-52	192
PaASAT2|Ax36474	scaffold-NGRR-2024459-Ternstroemia_gymnanthera	31.47	448	271	36	6	428	1416	106	2e-52	189
PaASAT2|Ax36474	scaffold-JGYZ-2000368-Holarrhena_pubescens	36.45	310	168	29	27	321	3	890	2e-52	185
PaASAT2|Ax36474	scaffold-JBYE-2029219-Hedera_helix-ground_root	30.3	439	282	24	5	424	1355	54	2e-52	189
PaASAT2|Ax36474	scaffold-UEEN-2163501-Forestiera_segregata	30.56	432	262	38	10	426	1556	330	2e-52	190
PaASAT2|Ax36474	scaffold-JBYE-2034096-Hedera_helix-ground_root	30.72	433	279	21	3	424	1351	83	3e-52	188
PaASAT2|Ax36474	scaffold-EDXZ-2091843-Schlegelia_violacea	32.81	448	272	29	3	423	116	1453	6e-52	191
PaASAT2|Ax36474	scaffold-GRFT-2073331-Buddleja_sp.	30.31	452	282	33	1	424	1625	285	7e-52	190
PaASAT2|Ax36474	scaffold-SALZ-2011131-Pittosporum_resiniferum-fruit	29.32	440	267	44	3	420	50	1303	8e-52	186
PaASAT2|Ax36474	scaffold-CWYJ-2002436-Heracleum_lanatum	30.72	446	258	51	10	424	383	1660	9e-52	192
PaASAT2|Ax36474	scaffold-DIHD-2095161-Heliotropium_tenellum-juvenile_leaf	34.09	352	204	28	90	424	3	1025	1e-51	186
PaASAT2|Ax36474	scaffold-MGVU-2039523-Allamanda_cathartica	30.13	458	273	47	3	424	1453	113	1e-51	188
PaASAT2|Ax36474	scaffold-JPDJ-2065870-Symplocus_sp.	30.68	440	274	31	1	424	53	1327	1e-51	186
PaASAT2|Ax36474	scaffold-DUQG-2053842-Tanacetum_parthenium	31.47	448	270	37	7	424	1528	206	1e-51	188
PaASAT2|Ax36474	scaffold-GUMF-2026913-Anthemis_tinctoria	31.4	430	262	33	7	410	1269	1	2e-51	186
PaASAT2|Ax36474	scaffold-WRPP-2129258-Synsepalum_dulcificum	31.53	444	263	41	5	425	1604	327	2e-51	188
PaASAT2|Ax36474	scaffold-DUQG-2053191-Tanacetum_parthenium	30.14	438	254	52	7	422	16	1239	2e-51	185
PaASAT2|Ax36474	scaffold-NUSE-2064428-Conzya_canadensis-glyphosate_resistant	29.56	433	281	24	8	423	43	1320	3e-51	186
PaASAT2|Ax36474	scaffold-IHPC-2074770-Platycodon_grandiflorus	30.98	439	279	24	5	424	1654	353	3e-51	188
PaASAT2|Ax36474	scaffold-MHYG-2084131-MHYG-Conzya_canadensis-2_samples_combined	29.56	433	281	24	8	423	1400	123	3e-51	186
PaASAT2|Ax36474	scaffold-VTOK-2102794-Orobanche_fasciculata-flower_buds	32.35	442	266	33	6	424	1354	59	3e-51	186
PaASAT2|Ax36474	scaffold-PHOQ-2097099-Orobanche_fasciculata-stem	32.35	442	266	33	6	424	49	1344	3e-51	186
PaASAT2|Ax36474	scaffold-VYDM-2130078-VYDM-Orobanche_fasciculata-2_samples_combined	32.35	442	266	33	6	424	1376	81	3e-51	186
PaASAT2|Ax36474	scaffold-CAQZ-2018165-Symphoricarpos_sp.	34.55	301	168	29	134	424	1121	276	4e-51	147
PaASAT2|Ax36474	scaffold-CAQZ-2018165-Symphoricarpos_sp.	34.4	125	69	13	1	112	1561	1187	4e-51	79
PaASAT2|Ax36474	scaffold-PUCW-2049222-Agastache_rugosa	30.16	441	271	37	8	423	79	1365	4e-51	186
PaASAT2|Ax36474	scaffold-ZSGF-2074142-ZSGF-Psychotria_ipecacuanha-2_samples_combined	30.8	435	275	26	8	422	161	1447	4e-51	187
PaASAT2|Ax36474	scaffold-QZZU-2066680-Pyrenacantha_malvifolia	31.05	438	277	25	5	428	1651	371	4e-51	188
PaASAT2|Ax36474	scaffold-JCLQ-2005315-Apocynum_androsaemifolium-A	32.28	381	244	14	1	370	1136	3	5e-51	183
PaASAT2|Ax36474	scaffold-BQEQ-2058168-Psychotria_ipecacuanha-invitro_plantlet	30.8	435	275	26	8	422	1662	376	7e-51	187
PaASAT2|Ax36474	scaffold-QURC-2028111-Dichroa_febrifuga	28.64	440	290	24	5	424	163	1470	1e-50	186
PaASAT2|Ax36474	scaffold-MZOB-2002916-Heliotropium_mendocinum	31.75	422	247	41	6	405	35	1243	1e-50	183
PaASAT2|Ax36474	scaffold-JPDJ-2007657-Symplocus_sp.	31.95	435	260	36	18	424	3	1283	1e-50	185
PaASAT2|Ax36474	scaffold-SUVN-2210095-SUVN-Hedera_helix-2_samples_combined	30.48	433	280	21	3	424	1509	241	1e-50	185
PaASAT2|Ax36474	scaffold-EITK-2142504-Hedera_helix-aerial_root	30.48	433	280	21	3	424	1509	241	1e-50	185
PaASAT2|Ax36474	scaffold-CLNU-2008377-Escallonia_sp._cv._Newport	28.8	434	286	23	5	424	240	1514	1e-50	185
PaASAT2|Ax36474	scaffold-ODDO-2102969-Ardisia_humilis	31.11	434	255	44	5	424	65	1276	2e-50	184
PaASAT2|Ax36474	scaffold-FFFY-2060584-Valeriana_officianalis	30.61	441	261	45	1	420	1469	219	2e-50	185
PaASAT2|Ax36474	scaffold-DCCI-2082975-Calceolaria_pinifolia	29.37	429	277	26	1	416	1422	175	3e-50	183
PaASAT2|Ax36474	scaffold-CLNU-2014848-Escallonia_sp._cv._Newport	32.08	427	255	35	6	407	439	1689	3e-50	185
PaASAT2|Ax36474	scaffold-UFQC-2054804-Apocynum_androsaemifolium-B	30.23	387	242	28	5	373	9	1139	3e-50	181
PaASAT2|Ax36474	scaffold-EJBY-2043475-Anticharis_glandulosa	30.16	441	277	31	1	420	1559	267	3e-50	184
PaASAT2|Ax36474	scaffold-ATYL-2033254-Scutellaria_montana	29.6	446	269	45	5	419	58	1353	3e-50	182
PaASAT2|Ax36474	scaffold-ZJRC-2213576-ZJRC-Sambucus_canadensis-2_samples_combined	30.97	423	270	22	6	414	1455	211	4e-50	183
PaASAT2|Ax36474	scaffold-QRNU-2172129-Sambucus_canadensis-B	30.97	423	270	22	6	414	1455	211	4e-50	183
PaASAT2|Ax36474	scaffold-EDBB-2087346-Polyscias_fruticosa	30.7	430	275	23	5	414	156	1436	5e-50	184
PaASAT2|Ax36474	scaffold-RGMN-2109615-Heliotropium_calcicola-mature_leaf	30.07	449	275	39	3	426	1415	111	5e-50	184
PaASAT2|Ax36474	scaffold-ZRIN-2017043-Uncarina_grandidieri	29.63	432	277	27	6	420	1411	146	6e-50	182
PaASAT2|Ax36474	scaffold-DAAD-2041798-Ardisia_revoluta	30.88	434	256	44	5	424	1244	33	6e-50	181
PaASAT2|Ax36474	scaffold-MZOB-2057974-Heliotropium_mendocinum	30.13	448	277	36	3	426	1473	166	6e-50	184
PaASAT2|Ax36474	scaffold-MDJK-2148536-MDJK-Heliotropium_texanum-2_samples_combined	30.33	422	265	29	6	409	1406	174	7e-50	182
PaASAT2|Ax36474	scaffold-CLMX-2045417-Escallonia_rubra	30.45	440	274	32	1	419	1410	124	8e-50	182
PaASAT2|Ax36474	scaffold-EIGQ-2024001-Heliotropium_calcicola-juvenile_leaf	30.07	449	275	39	3	426	1471	167	8e-50	184
PaASAT2|Ax36474	scaffold-NGRR-2022499-Ternstroemia_gymnanthera	31.35	437	269	31	5	426	41	1303	1e-49	183
PaASAT2|Ax36474	scaffold-TQKZ-2012791-Angelica_archangelica	31.36	440	262	40	13	424	1600	317	1e-49	184
PaASAT2|Ax36474	scaffold-FXGI-2053220-Stylidium_adnatum	30.32	432	277	24	8	424	50	1318	1e-49	181
PaASAT2|Ax36474	scaffold-UCNM-2056357-Ajuga_reptans	31.42	436	226	73	8	416	36	1205	1e-49	180
PaASAT2|Ax36474	scaffold-VUSY-2135775-Nyssa_ogeche	30.09	422	275	20	5	414	86	1327	1e-49	182
PaASAT2|Ax36474	scaffold-HLJG-2153385-Viburnum_odoratissimum	29.54	457	274	48	5	426	1484	153	1e-49	182
PaASAT2|Ax36474	scaffold-WEQK-2067302-Centella_asiatica	29.61	456	271	50	8	429	1483	164	2e-49	183
PaASAT2|Ax36474	scaffold-EIGQ-2024002-Heliotropium_calcicola-juvenile_leaf	30.07	449	275	39	3	426	1471	167	2e-49	184
PaASAT2|Ax36474	scaffold-WUZV-2064078-Lindenbergia_philippensis-flower	30.63	444	269	39	6	424	196	1485	2e-49	182
PaASAT2|Ax36474	scaffold-BNTL-2001005-Souroubea_exauriculata	29.93	441	273	36	1	424	1509	244	2e-49	182
PaASAT2|Ax36474	scaffold-ZVFS-2057389-Lindenbergia_philippensis-leaves	30.63	444	269	39	6	424	193	1482	2e-49	182
PaASAT2|Ax36474	scaffold-JOPH-2015430-Psychotria_ipecacuanha-root_culture	30.57	435	276	26	8	422	1596	310	2e-49	182
PaASAT2|Ax36474	scaffold-EJCM-2075820-EJCM-Lindenbergia_philippensis-2_samples_combined	30.63	444	269	39	6	424	1457	168	2e-49	182
PaASAT2|Ax36474	scaffold-GIOY-2002450-Corokia_cotoneaster	31.42	452	256	54	10	419	1321	2	2e-49	181
PaASAT2|Ax36474	scaffold-QAUE-2032291-Actinidia_chinensis	30.89	437	273	29	5	426	1562	294	2e-49	182
PaASAT2|Ax36474	scaffold-SALZ-2068975-Pittosporum_resiniferum-fruit	29.48	424	272	27	16	426	3	1232	2e-49	179
PaASAT2|Ax36474	scaffold-FFFY-2013271-Valeriana_officianalis	32.61	417	243	38	29	427	1683	493	2e-49	182
PaASAT2|Ax36474	scaffold-EDEQ-2009610-Wrightia_natalensis	31	442	267	38	6	426	95	1369	3e-49	183
PaASAT2|Ax36474	scaffold-SALZ-2070325-Pittosporum_resiniferum-fruit	31.85	449	249	57	10	427	83	1351	3e-49	182
PaASAT2|Ax36474	scaffold-DUQG-2054015-Tanacetum_parthenium	29.5	444	269	44	7	422	145	1428	4e-49	182
PaASAT2|Ax36474	scaffold-WEAC-2012956-Strobilanthes_dyerianus	30.68	440	249	56	8	415	1357	110	4e-49	179
PaASAT2|Ax36474	scaffold-OINM-2002514-Hydrocotyle_umbellata	30.8	448	272	38	1	424	41	1342	4e-49	182
PaASAT2|Ax36474	scaffold-ECTD-2028922-Gentiana_acaulis	29.88	425	279	19	10	424	1421	174	8e-49	179
PaASAT2|Ax36474	scaffold-XVRU-2038267-XVRU-Heliotropium_calcicola-3_samples_combined	29.84	449	276	39	3	426	1471	167	8e-49	181
PaASAT2|Ax36474	scaffold-SALZ-2016612-Pittosporum_resiniferum-fruit	30.68	440	256	49	10	424	1472	225	9e-49	180
PaASAT2|Ax36474	scaffold-UOYN-2042411-Catharanthus_roseus	31.03	435	253	47	3	416	322	1548	1e-48	180
PaASAT2|Ax36474	scaffold-GRFT-2019632-Buddleja_sp.	28.31	445	276	43	5	422	61	1347	1e-48	178
PaASAT2|Ax36474	scaffold-CLNU-2014057-Escallonia_sp._cv._Newport	33.49	433	256	32	6	414	492	1766	1e-48	181
PaASAT2|Ax36474	scaffold-QIKZ-2000879-Griselinia_racemosa	30.43	470	274	53	1	426	301	1683	1e-48	181
PaASAT2|Ax36474	scaffold-XVRU-2038268-XVRU-Heliotropium_calcicola-3_samples_combined	29.84	449	276	39	3	426	1471	167	2e-48	181
PaASAT2|Ax36474	scaffold-WOHL-2179691-WOHL-Schlegelia_parasitica-2_samples_combined	28.7	432	283	25	4	421	95	1357	2e-48	180
PaASAT2|Ax36474	scaffold-GAKQ-2021524-Schlegelia_parasitica	28.7	432	283	25	4	421	94	1356	2e-48	180
PaASAT2|Ax36474	scaffold-GRFT-2000868-Buddleja_sp.	29.36	453	277	43	8	423	68	1408	2e-48	180
PaASAT2|Ax36474	scaffold-WEQK-2005302-Centella_asiatica	29.12	443	285	29	5	424	141	1451	2e-48	180
PaASAT2|Ax36474	scaffold-DTOA-2013758-Maesa_lanceolata	29.68	438	267	41	5	424	1403	159	3e-48	179
PaASAT2|Ax36474	scaffold-SALZ-2069561-Pittosporum_resiniferum-fruit	28.89	450	273	47	3	430	63	1337	3e-48	177
PaASAT2|Ax36474	scaffold-YADI-2014180-Asclepias_syriaca	30.74	462	278	42	5	424	1554	169	3e-48	179
PaASAT2|Ax36474	scaffold-VKJD-2012521-VKJD-Maesa_lanceolata-2_samples_combined	29.68	438	267	41	5	424	149	1393	3e-48	179
PaASAT2|Ax36474	scaffold-YFQX-2004358-YFQX-Apocynum_androsaemifolium-2_samples_combined	39.77	176	103	3	1	174	72	596	4e-48	130
PaASAT2|Ax36474	scaffold-YFQX-2004358-YFQX-Apocynum_androsaemifolium-2_samples_combined	30.53	262	161	21	184	427	625	1401	4e-48	85.9
PaASAT2|Ax36474	scaffold-WEQK-2006248-Centella_asiatica	31.22	442	267	37	6	424	1464	181	4e-48	179
PaASAT2|Ax36474	scaffold-IZNU-2044349-Ipomoea_lobata	30.41	434	276	26	5	422	36	1307	4e-48	177
PaASAT2|Ax36474	scaffold-MHYG-2082147-MHYG-Conzya_canadensis-2_samples_combined	33.78	370	204	41	29	381	1056	19	4e-48	174
PaASAT2|Ax36474	scaffold-SALZ-2016830-Pittosporum_resiniferum-fruit	32.98	285	171	20	151	424	1077	250	6e-48	120
PaASAT2|Ax36474	scaffold-SALZ-2016830-Pittosporum_resiniferum-fruit	35.85	159	89	13	1	158	1501	1061	6e-48	95.5
PaASAT2|Ax36474	scaffold-UBLN-2083919-Xanthuium_strumarium	29.89	445	273	39	7	423	1378	77	6e-48	177
PaASAT2|Ax36474	scaffold-DSUV-2056480-Asclepia_curassavica	30.49	446	270	40	5	416	25	1344	6e-48	179
PaASAT2|Ax36474	scaffold-UFQC-2056011-Apocynum_androsaemifolium-B	31.11	450	265	45	1	424	125	1417	6e-48	177
PaASAT2|Ax36474	scaffold-YFQX-2008346-YFQX-Apocynum_androsaemifolium-2_samples_combined	31.11	450	265	45	1	424	1406	114	7e-48	177

## Sheet: PaASAT3
PaASAT3|Ax31629	scaffold-BOLZ-2171050-Atropa_belladonna	72.04	422	111	7	14	430	72	1331	0	612
PaASAT3|Ax31629	scaffold-LQJY-2082072-Solanum_xanthocarpum	41.4	442	231	28	4	428	1853	561	5e-105	330
PaASAT3|Ax31629	scaffold-GHLP-2057362-Solanum_dulcamara	42.3	435	227	24	7	428	1403	132	2e-103	322
PaASAT3|Ax31629	scaffold-BOLZ-2038238-Atropa_belladonna	42.01	438	231	23	7	427	1398	103	1e-102	320
PaASAT3|Ax31629	scaffold-EMAL-2005913-Ehretia_acuminata	41.32	438	237	20	4	429	88	1377	2e-102	319
PaASAT3|Ax31629	scaffold-MKZR-2110551-Nicotiana_sylvestris	42.61	406	215	18	35	428	1468	269	4e-101	316
PaASAT3|Ax31629	scaffold-BOLZ-2171211-Atropa_belladonna	40.6	431	228	28	11	428	1496	249	2e-98	310
PaASAT3|Ax31629	scaffold-EMAL-2005912-Ehretia_acuminata	38.66	432	247	18	11	429	75	1355	5e-97	305
PaASAT3|Ax31629	scaffold-JCLQ-2044373-Apocynum_androsaemifolium-A	40.7	430	232	23	11	427	1329	70	2e-96	303
PaASAT3|Ax31629	scaffold-UFQC-2004442-Apocynum_androsaemifolium-B	40.7	430	232	23	11	427	168	1427	5e-96	303
PaASAT3|Ax31629	scaffold-YFQX-2001937-YFQX-Apocynum_androsaemifolium-2_samples_combined	40.7	430	232	23	11	427	168	1427	1e-95	303
PaASAT3|Ax31629	scaffold-BFJL-2023027-Cornus_floridana	40.61	426	237	16	11	427	1656	400	9e-94	300
PaASAT3|Ax31629	scaffold-ABEH-2013086-Heliotropium_greggii	40.32	439	238	24	11	427	48	1358	2e-93	296
PaASAT3|Ax31629	scaffold-BNTL-2025431-Souroubea_exauriculata	38.23	429	246	19	8	426	78	1337	9e-93	295
PaASAT3|Ax31629	scaffold-XVRU-2029900-XVRU-Heliotropium_calcicola-3_samples_combined	37.56	434	256	15	4	428	68	1351	1e-92	293
PaASAT3|Ax31629	scaffold-IPPG-2059346-Heliotropium_filiforme-juvenile_leaf	37.82	431	259	9	4	428	155	1438	1e-92	297
PaASAT3|Ax31629	scaffold-XVRU-2029902-XVRU-Heliotropium_calcicola-3_samples_combined	37.24	435	259	14	4	428	68	1360	2e-92	293
PaASAT3|Ax31629	scaffold-OEKO-2015565-OEKO-Heliotropium_filiforme-2_samples_combined	37.82	431	259	9	4	428	62	1345	2e-92	297
PaASAT3|Ax31629	scaffold-NIGS-2110309-Heliotropium_karwinsky	38.6	430	250	14	4	427	1448	183	6e-92	293
PaASAT3|Ax31629	scaffold-OSMU-2080126-Lycium_sp.	37.89	454	249	33	1	428	87	1427	7e-92	295
PaASAT3|Ax31629	scaffold-NIGS-2002637-Heliotropium_karwinsky	37.06	429	257	13	8	428	4	1275	1e-91	291
PaASAT3|Ax31629	scaffold-JNVS-2050220-Datura_metel	38.79	428	248	14	8	428	98	1360	2e-90	288
PaASAT3|Ax31629	scaffold-IDGE-2106182-Heliotropium_racemosum	37.99	437	253	18	2	428	3073	1787	3e-90	301
PaASAT3|Ax31629	scaffold-JWEY-2020245-Heliotropium_sp.	39.51	405	225	20	40	430	1386	190	8e-90	286
PaASAT3|Ax31629	scaffold-GGJD-2123219-Strychnos_spinosa	39.13	437	242	24	1	427	1526	258	2e-88	285
PaASAT3|Ax31629	scaffold-NIGS-2110308-Heliotropium_karwinsky	34.86	436	270	14	1	427	1453	161	2e-87	282
PaASAT3|Ax31629	scaffold-HGSM-2070554-Gelsemium_sempervirens	36.83	429	251	20	11	427	1367	105	3e-87	281
PaASAT3|Ax31629	scaffold-DKFZ-2016727-Mertensia_paniculata	37.18	425	248	19	11	427	225	1466	1e-86	278
PaASAT3|Ax31629	scaffold-SXML-2016065-Ilex_paraguariensis	37.67	430	248	20	11	427	141	1409	3e-86	280
PaASAT3|Ax31629	scaffold-OUER-2027258-Heliotropium_convolvulaceum	37.9	409	239	15	25	427	1288	89	8e-86	275
PaASAT3|Ax31629	scaffold-YFQX-2068450-YFQX-Apocynum_androsaemifolium-2_samples_combined	37.62	420	248	14	7	421	1292	60	3e-85	273
PaASAT3|Ax31629	scaffold-JCLQ-2044022-Apocynum_androsaemifolium-A	37.62	420	248	14	7	421	5	1237	3e-85	273
PaASAT3|Ax31629	scaffold-VJSJ-2026958-Heliotropium_calcicola	36.38	426	256	15	11	427	1469	210	4e-85	276
PaASAT3|Ax31629	scaffold-XVRU-2046087-XVRU-Heliotropium_calcicola-3_samples_combined	36.38	426	256	15	11	427	1469	210	7e-85	276
PaASAT3|Ax31629	scaffold-VJSJ-2029346-Heliotropium_calcicola	36.34	410	241	20	30	427	1	1206	4e-83	270
PaASAT3|Ax31629	scaffold-XVRU-2171375-XVRU-Heliotropium_calcicola-3_samples_combined	36.34	410	241	20	30	427	1478	273	4e-83	270
PaASAT3|Ax31629	scaffold-HLJG-2026155-Viburnum_odoratissimum	36.7	436	246	30	11	429	111	1379	1e-81	268
PaASAT3|Ax31629	scaffold-IDGE-2025815-Heliotropium_racemosum	36.57	432	248	26	11	427	1426	164	2e-81	266
PaASAT3|Ax31629	scaffold-MZOB-2012709-Heliotropium_mendocinum	37	427	246	23	4	421	45	1283	1e-80	261
PaASAT3|Ax31629	scaffold-DAAD-2042705-Ardisia_revoluta	34.35	425	261	18	11	427	1522	278	5e-80	263
PaASAT3|Ax31629	scaffold-UOYN-2041261-Catharanthus_roseus	35.43	429	250	27	7	427	1310	81	6e-80	260
PaASAT3|Ax31629	scaffold-JGYZ-2004855-Holarrhena_pubescens	40.59	372	200	21	46	401	3	1103	7e-80	259
PaASAT3|Ax31629	scaffold-DKFZ-2068695-Mertensia_paniculata	35.5	431	255	23	11	427	1318	53	2e-79	258
PaASAT3|Ax31629	scaffold-BOLZ-2029346-Atropa_belladonna	44.17	326	164	18	10	329	45	986	6e-79	255
PaASAT3|Ax31629	scaffold-BOLZ-2029346-Atropa_belladonna	42.25	71	39	2	348	417	1034	1243	6e-79	63.9
PaASAT3|Ax31629	scaffold-HLJG-2153394-Viburnum_odoratissimum	35.13	427	250	27	12	427	1438	206	9e-79	259
PaASAT3|Ax31629	scaffold-BOLZ-2029345-Atropa_belladonna	43.6	289	145	18	10	292	45	875	3e-78	224
PaASAT3|Ax31629	scaffold-BOLZ-2029345-Atropa_belladonna	36.73	147	88	5	287	429	860	1297	3e-78	93.2
PaASAT3|Ax31629	scaffold-SNBI-2012701-Sambucus_canadensis	35.83	427	240	34	14	427	1388	171	2e-77	255
PaASAT3|Ax31629	scaffold-UFHF-2012590-Galax_urceolata-tetraploid	35.27	448	250	40	11	427	1363	47	3e-77	254
PaASAT3|Ax31629	scaffold-OUER-2008485-Heliotropium_convolvulaceum	34.42	430	267	15	11	429	2034	757	6e-77	259
PaASAT3|Ax31629	scaffold-LQJY-2007343-Solanum_xanthocarpum	36.73	441	234	45	11	426	82	1344	6e-76	251
PaASAT3|Ax31629	scaffold-ADHK-2014077-Galax_urceolata-diploid	35.04	448	251	40	11	427	1606	290	7e-76	253
PaASAT3|Ax31629	scaffold-PIYM-2081268-PIYM-Galax_urceolata-2_samples_combined	35.04	448	251	40	11	427	1606	290	7e-76	253
PaASAT3|Ax31629	scaffold-EMAL-2018618-Ehretia_acuminata	42.22	315	166	16	11	311	940	2	8e-76	246
PaASAT3|Ax31629	scaffold-HLJG-2025035-Viburnum_odoratissimum	35.45	409	231	33	11	405	173	1342	1e-75	250
PaASAT3|Ax31629	scaffold-QEHE-2092064-Rauvolfia_tetraphyla	36.57	432	243	31	5	427	175	1404	5e-75	249
PaASAT3|Ax31629	scaffold-IDGE-2105614-Heliotropium_racemosum	34.52	423	262	15	16	427	89	1345	7e-75	247
PaASAT3|Ax31629	scaffold-KPUM-2102358-Exacum_affine	33.26	427	273	12	8	427	1591	326	8e-75	251
PaASAT3|Ax31629	scaffold-QEHE-2024055-Rauvolfia_tetraphyla	36.64	434	243	32	4	427	38	1273	8e-75	247
PaASAT3|Ax31629	scaffold-LQJY-2001565-Solanum_xanthocarpum	35.93	295	178	11	141	426	918	40	2e-74	179
PaASAT3|Ax31629	scaffold-LQJY-2001565-Solanum_xanthocarpum	50.81	124	55	6	16	135	1286	921	2e-74	125
PaASAT3|Ax31629	scaffold-ZJRC-2019034-ZJRC-Sambucus_canadensis-2_samples_combined	34.43	427	238	42	17	427	1560	358	2e-74	250
PaASAT3|Ax31629	scaffold-IDGE-2009207-Heliotropium_racemosum	35.08	439	256	29	11	427	1407	112	2e-74	247
PaASAT3|Ax31629	scaffold-NTEO-2067838-Pittosporum_sahnianum	35.32	436	258	24	4	427	1455	184	2e-74	248
PaASAT3|Ax31629	scaffold-EITK-2034113-Hedera_helix-aerial_root	35.33	433	262	18	8	431	156	1427	3e-74	248
PaASAT3|Ax31629	scaffold-HLJG-2153453-Viburnum_odoratissimum	36.28	419	237	30	11	419	1364	168	2e-73	247
PaASAT3|Ax31629	scaffold-LQJY-2080100-Solanum_xanthocarpum	34.03	432	257	28	7	428	6	1247	7e-73	242
PaASAT3|Ax31629	scaffold-QIKZ-2027267-Griselinia_racemosa	34.75	400	248	13	36	427	1403	219	8e-73	248
PaASAT3|Ax31629	scaffold-QEHE-2010212-Rauvolfia_tetraphyla	37.47	387	224	18	43	426	2	1117	2e-72	239
PaASAT3|Ax31629	scaffold-IDGE-2105816-Heliotropium_racemosum	34.83	422	253	22	11	419	1465	227	2e-72	243
PaASAT3|Ax31629	scaffold-XKVX-2000295-Heliotropium_filiforme-mature_leaf	44.72	246	132	4	4	247	62	793	3e-72	216
PaASAT3|Ax31629	scaffold-XKVX-2000295-Heliotropium_filiforme-mature_leaf	28.42	183	126	5	250	428	795	1340	3e-72	80.5
PaASAT3|Ax31629	scaffold-EDBB-2086749-Polyscias_fruticosa	35.21	426	255	21	8	422	13	1260	8e-72	239
PaASAT3|Ax31629	scaffold-XQRV-2014491-XQRV-Ipomoea_purpurea-2_samples_combined	47.83	253	123	9	8	255	27	773	1e-71	233
PaASAT3|Ax31629	scaffold-BOLZ-2170684-Atropa_belladonna	39.61	356	195	20	85	428	13	1056	2e-71	237
PaASAT3|Ax31629	scaffold-SALZ-2005021-Pittosporum_resiniferum-fruit	34.18	433	261	24	11	427	1351	77	2e-71	239
PaASAT3|Ax31629	scaffold-XVRU-2029903-XVRU-Heliotropium_calcicola-3_samples_combined	35.81	363	219	14	76	428	6	1082	7e-71	234
PaASAT3|Ax31629	scaffold-JGYZ-2000371-Holarrhena_pubescens	39.75	317	182	9	7	318	190	1128	2e-70	234
PaASAT3|Ax31629	scaffold-SXML-2071581-Ilex_paraguariensis	34.09	443	260	32	8	427	1549	248	3e-70	238
PaASAT3|Ax31629	scaffold-JGYZ-2001414-Holarrhena_pubescens	39.76	327	179	18	11	322	1063	92	6e-70	231
PaASAT3|Ax31629	scaffold-HANM-2069259-Pholisma_arenarium	45.65	276	138	12	14	280	3	821	1e-69	228
PaASAT3|Ax31629	scaffold-JPDJ-2001077-Symplocus_sp.	33.63	446	263	33	8	427	161	1477	3e-69	234
PaASAT3|Ax31629	scaffold-QIKZ-2033706-Griselinia_racemosa	34.11	428	260	22	11	427	1526	276	3e-69	235
PaASAT3|Ax31629	scaffold-SXML-2005309-Ilex_paraguariensis	33.72	433	264	23	8	429	128	1390	4e-69	233
PaASAT3|Ax31629	scaffold-DKFZ-2068969-Mertensia_paniculata	33.48	457	259	45	8	427	63	1409	8e-69	233
PaASAT3|Ax31629	scaffold-IDGE-2009208-Heliotropium_racemosum	35.14	424	248	27	25	427	1365	112	9e-69	231
PaASAT3|Ax31629	scaffold-DTOA-2092303-Maesa_lanceolata	34.71	435	257	27	8	429	1284	22	1e-68	231
PaASAT3|Ax31629	scaffold-YADI-2001729-Asclepias_syriaca	36.74	411	203	57	46	427	1282	134	1e-68	230
PaASAT3|Ax31629	scaffold-MZOB-2011194-Heliotropium_mendocinum	46.08	204	102	8	5	203	74	676	1e-68	180
PaASAT3|Ax31629	scaffold-MZOB-2011194-Heliotropium_mendocinum	29.96	227	145	14	211	429	699	1361	1e-68	103
PaASAT3|Ax31629	scaffold-WRPP-2129258-Synsepalum_dulcificum	32.89	447	265	35	3	428	1625	327	1e-68	234
PaASAT3|Ax31629	scaffold-NGRR-2022499-Ternstroemia_gymnanthera	33.26	427	263	22	13	429	59	1303	2e-68	233
PaASAT3|Ax31629	scaffold-CLNU-2064459-Escallonia_sp._cv._Newport	31.96	438	265	33	8	429	73	1335	2e-68	232
PaASAT3|Ax31629	scaffold-VKJD-2131033-VKJD-Maesa_lanceolata-2_samples_combined	34.71	435	257	27	8	429	91	1353	2e-68	231
PaASAT3|Ax31629	scaffold-AUIP-2130635-Phelline_lucida	33.56	438	276	15	2	429	5	1303	2e-68	232
PaASAT3|Ax31629	scaffold-IHPC-2074225-Platycodon_grandiflorus	33.56	444	256	39	11	427	79	1374	3e-68	231
PaASAT3|Ax31629	scaffold-IHPC-2074770-Platycodon_grandiflorus	33.63	443	261	33	8	427	1651	353	2e-67	231
PaASAT3|Ax31629	scaffold-ZJRC-2003755-ZJRC-Sambucus_canadensis-2_samples_combined	33.99	409	236	34	32	427	267	1430	2e-67	230
PaASAT3|Ax31629	scaffold-YADI-2006494-Asclepias_syriaca	39.18	319	175	19	20	326	4	939	3e-67	223
PaASAT3|Ax31629	scaffold-AJFN-2024153-Mydocarpus_sp.	34.26	432	256	28	8	418	157	1431	3e-67	228
PaASAT3|Ax31629	scaffold-BNTL-2006498-Souroubea_exauriculata	34.02	438	253	36	8	427	41	1300	1e-66	228
PaASAT3|Ax31629	scaffold-OSMU-2076670-Lycium_sp.	40.26	308	169	15	123	424	897	1	2e-66	220
PaASAT3|Ax31629	scaffold-WOHL-2179691-WOHL-Schlegelia_parasitica-2_samples_combined	34.56	434	250	34	8	423	101	1354	3e-66	227
PaASAT3|Ax31629	scaffold-GAKQ-2021524-Schlegelia_parasitica	34.56	434	250	34	8	423	100	1353	3e-66	227
PaASAT3|Ax31629	scaffold-UEEN-2163501-Forestiera_segregata	35.43	429	246	31	12	429	1556	330	3e-66	227
PaASAT3|Ax31629	scaffold-CLMX-2009554-Escallonia_rubra	31.28	438	268	33	8	429	85	1347	9e-66	225
PaASAT3|Ax31629	scaffold-UOYN-2042411-Catharanthus_roseus	32.31	424	251	36	11	419	340	1548	9e-66	226
PaASAT3|Ax31629	scaffold-JPDJ-2065870-Symplocus_sp.	34.47	441	256	33	3	427	56	1327	1e-65	223
PaASAT3|Ax31629	scaffold-QAUE-2032291-Actinidia_chinensis	32.72	437	264	30	8	429	1559	294	1e-65	226
PaASAT3|Ax31629	scaffold-DCCI-2082975-Calceolaria_pinifolia	33.41	425	256	27	8	419	1407	175	2e-65	223
PaASAT3|Ax31629	scaffold-YFQX-2069059-YFQX-Apocynum_androsaemifolium-2_samples_combined	33.26	430	256	31	11	417	57	1322	3e-65	223
PaASAT3|Ax31629	scaffold-JGYZ-2000368-Holarrhena_pubescens	41.02	295	165	9	29	318	3	875	4e-65	218
PaASAT3|Ax31629	scaffold-MZOB-2004511-Heliotropium_mendocinum	36.58	380	214	27	11	372	26	1138	5e-65	219
PaASAT3|Ax31629	scaffold-BNTL-2001005-Souroubea_exauriculata	32.63	426	272	15	8	427	1494	244	5e-65	223
PaASAT3|Ax31629	scaffold-WXVX-2075214-Ledum_palustre	33.19	455	248	56	13	429	70	1380	6e-65	223
PaASAT3|Ax31629	scaffold-DSUV-2055900-Asclepia_curassavica	34.47	438	261	26	6	427	75	1358	6e-65	223
PaASAT3|Ax31629	scaffold-GAKQ-2078883-Schlegelia_parasitica	31.77	447	261	44	8	427	1364	75	7e-65	222
PaASAT3|Ax31629	scaffold-GNPX-2002793-Oxera_neriifolia	36.39	415	226	38	11	410	28	1203	7e-65	224
PaASAT3|Ax31629	scaffold-XVRU-2171553-XVRU-Heliotropium_calcicola-3_samples_combined	33.03	436	259	33	6	419	38	1312	9e-65	224
PaASAT3|Ax31629	scaffold-RGMN-2109632-Heliotropium_calcicola-mature_leaf	33.03	436	259	33	6	419	1678	404	1e-64	223
PaASAT3|Ax31629	scaffold-EIGQ-2122671-Heliotropium_calcicola-juvenile_leaf	33.03	436	259	33	6	419	19	1293	1e-64	223
PaASAT3|Ax31629	scaffold-VJSJ-2102348-Heliotropium_calcicola	33.03	436	259	33	6	419	1678	404	1e-64	223
PaASAT3|Ax31629	scaffold-OUER-2026346-Heliotropium_convolvulaceum	35.46	423	250	23	11	419	68	1309	2e-64	221
PaASAT3|Ax31629	scaffold-TKEK-2071474-Mansoa_alliacea	31.64	433	272	24	8	427	74	1339	2e-64	221
PaASAT3|Ax31629	scaffold-JCLQ-2044736-Apocynum_androsaemifolium-A	33.02	430	257	31	11	417	1446	181	2e-64	221
PaASAT3|Ax31629	scaffold-VJSJ-2024352-Heliotropium_calcicola	35.04	351	215	13	86	428	1102	65	2e-64	217
PaASAT3|Ax31629	scaffold-QRNU-2171255-Sambucus_canadensis-B	34.83	379	214	33	62	427	1	1077	3e-64	219
PaASAT3|Ax31629	scaffold-NGRR-2024947-Ternstroemia_gymnanthera	32.73	440	267	29	8	428	1574	285	3e-64	221
PaASAT3|Ax31629	scaffold-WOHL-2179976-WOHL-Schlegelia_parasitica-2_samples_combined	31.77	447	261	44	8	427	112	1401	5e-64	222
PaASAT3|Ax31629	scaffold-WEQK-2067018-Centella_asiatica	32.51	443	268	31	8	427	161	1465	5e-64	221
PaASAT3|Ax31629	scaffold-JBYE-2029219-Hedera_helix-ground_root	33.11	441	266	29	8	427	1352	54	6e-64	220
PaASAT3|Ax31629	scaffold-OINM-2146269-Hydrocotyle_umbellata	33.86	440	263	28	6	430	27	1307	6e-64	219
PaASAT3|Ax31629	scaffold-GNPX-2012247-Oxera_neriifolia	35.71	406	227	34	11	403	1479	325	8e-64	219
PaASAT3|Ax31629	scaffold-SNNC-2050574-Leonurus_japonicus	34.07	408	236	33	11	404	45	1211	9e-64	218
PaASAT3|Ax31629	scaffold-FXGI-2054068-Stylidium_adnatum	33.03	436	261	31	11	427	179	1450	9e-64	220
PaASAT3|Ax31629	scaffold-NGRR-2020959-Ternstroemia_gymnanthera	35.43	398	200	57	8	376	67	1176	1e-63	216
PaASAT3|Ax31629	scaffold-ASMV-2000922-Ilex_vomitoria	31.82	440	276	24	8	427	248	1555	1e-63	222
PaASAT3|Ax31629	scaffold-KTAR-2140062-Chionanthus_retusus	31.68	423	261	28	16	425	81	1304	1e-63	218
PaASAT3|Ax31629	scaffold-ECTD-2028993-Gentiana_acaulis	33.02	427	258	28	8	419	1455	214	2e-63	218
PaASAT3|Ax31629	scaffold-OINM-2002514-Hydrocotyle_umbellata	32.64	435	266	27	11	427	65	1342	3e-63	220
PaASAT3|Ax31629	scaffold-EMAL-2013448-Ehretia_acuminata	34.25	438	255	33	8	422	152	1435	4e-63	222
PaASAT3|Ax31629	scaffold-FFFY-2060551-Valeriana_officianalis	33.64	431	254	32	2	422	1474	248	5e-63	218
PaASAT3|Ax31629	scaffold-JPDJ-2007657-Symplocus_sp.	33.33	429	263	23	20	427	3	1283	5e-63	217
PaASAT3|Ax31629	scaffold-ZJRC-2014378-ZJRC-Sambucus_canadensis-2_samples_combined	34.24	441	254	36	8	427	12	1289	5e-63	216
PaASAT3|Ax31629	scaffold-UOYN-2041939-Catharanthus_roseus	33.48	445	263	33	4	427	21	1319	6e-63	217
PaASAT3|Ax31629	scaffold-UCNM-2010193-Ajuga_reptans	32.2	410	256	22	11	411	28	1218	1e-62	214
PaASAT3|Ax31629	scaffold-JCLQ-2005315-Apocynum_androsaemifolium-A	34.12	381	220	31	11	371	1112	3	2e-62	213
PaASAT3|Ax31629	scaffold-CAQZ-2018164-Symphoricarpos_sp.	33.87	437	251	38	12	427	1480	221	2e-62	216
PaASAT3|Ax31629	scaffold-TORX-2019676-Olea_europaea	31.95	435	254	42	16	429	187	1428	2e-62	217
PaASAT3|Ax31629	scaffold-SALZ-2069518-Pittosporum_resiniferum-fruit	33.8	432	257	29	8	418	1355	84	3e-62	214
PaASAT3|Ax31629	scaffold-IHPC-2074198-Platycodon_grandiflorus	32.13	442	259	41	8	425	1386	112	4e-62	215
PaASAT3|Ax31629	scaffold-QIKZ-2001984-Griselinia_racemosa	33.03	442	272	24	8	427	72	1391	7e-62	214
PaASAT3|Ax31629	scaffold-EDEQ-2070163-Wrightia_natalensis	41.91	272	148	10	9	280	799	14	1e-61	207
PaASAT3|Ax31629	scaffold-TQKZ-2014878-Angelica_archangelica	34.18	433	251	34	16	427	140	1399	1e-61	215
PaASAT3|Ax31629	scaffold-DOVJ-2063440-Leontopodium_alpinum	33.03	445	256	42	8	427	1325	42	1e-61	213
PaASAT3|Ax31629	scaffold-GGJD-2020259-Strychnos_spinosa	32.96	443	263	34	8	427	333	1628	2e-61	218
PaASAT3|Ax31629	scaffold-GRFT-2019632-Buddleja_sp.	31.22	442	266	38	8	425	64	1347	2e-61	212
PaASAT3|Ax31629	scaffold-GNPX-2107936-Oxera_neriifolia	32.85	411	245	31	11	410	70	1242	2e-61	213
PaASAT3|Ax31629	scaffold-VKJD-2017330-VKJD-Maesa_lanceolata-2_samples_combined	33.11	441	247	48	8	422	4	1260	2e-61	211
PaASAT3|Ax31629	scaffold-DTOA-2007357-Maesa_lanceolata	33.11	441	247	48	8	422	4	1260	2e-61	211
PaASAT3|Ax31629	scaffold-JGYZ-2045647-Holarrhena_pubescens	31.67	442	270	32	8	427	1764	469	2e-61	216
PaASAT3|Ax31629	scaffold-QEHE-2010745-Rauvolfia_tetraphyla	33.98	362	217	22	62	416	38	1078	3e-61	210
PaASAT3|Ax31629	scaffold-QEHE-2010744-Rauvolfia_tetraphyla	33.98	362	217	22	62	416	38	1078	3e-61	210
PaASAT3|Ax31629	scaffold-VTOK-2103111-Orobanche_fasciculata-flower_buds	33.49	433	255	33	8	417	1512	244	3e-61	213
PaASAT3|Ax31629	scaffold-NGRR-2024459-Ternstroemia_gymnanthera	32.37	451	258	47	8	428	1416	115	4e-61	212
PaASAT3|Ax31629	scaffold-GSZA-2011755-Lonicera_japonica	31.92	426	262	28	10	425	16	1239	7e-61	214
PaASAT3|Ax31629	scaffold-PHOQ-2097539-Orobanche_fasciculata-stem	33.49	433	255	33	8	417	1559	291	7e-61	213
PaASAT3|Ax31629	scaffold-ZJRC-2213576-ZJRC-Sambucus_canadensis-2_samples_combined	32.33	433	266	27	2	418	1473	208	7e-61	212
PaASAT3|Ax31629	scaffold-QRNU-2172129-Sambucus_canadensis-B	32.33	433	266	27	2	418	1473	208	7e-61	212
PaASAT3|Ax31629	scaffold-JEXA-2013553-Impatiens_balsamifera	29.93	431	280	22	8	427	115	1374	8e-61	211
PaASAT3|Ax31629	scaffold-VYDM-2130556-VYDM-Orobanche_fasciculata-2_samples_combined	33.49	433	255	33	8	417	1559	291	8e-61	213
PaASAT3|Ax31629	scaffold-UMUL-2086675-Paulownia_fargesii	32.27	437	271	25	8	427	1527	241	8e-61	213
PaASAT3|Ax31629	scaffold-RTNA-2089608-Oxera_pulchella	32.12	411	248	31	11	410	73	1245	9e-61	210
PaASAT3|Ax31629	scaffold-MZOB-2002916-Heliotropium_mendocinum	34.04	423	239	40	11	412	44	1255	1e-60	209
PaASAT3|Ax31629	scaffold-JCLQ-2005855-Apocynum_androsaemifolium-A	31.6	443	271	32	8	427	1551	250	1e-60	212
PaASAT3|Ax31629	scaffold-XXYA-2079140-Verbascum_sp.	31.9	442	268	33	11	429	52	1347	1e-60	210
PaASAT3|Ax31629	scaffold-QEHE-2002163-Rauvolfia_tetraphyla	31.29	441	273	30	8	427	1511	216	1e-60	211
PaASAT3|Ax31629	scaffold-QURC-2028111-Dichroa_febrifuga	29.77	440	284	25	8	427	166	1470	2e-60	213
PaASAT3|Ax31629	scaffold-QEHE-2002164-Rauvolfia_tetraphyla	31.29	441	273	30	8	427	1516	221	2e-60	211
PaASAT3|Ax31629	scaffold-SNBI-2005428-Sambucus_canadensis	40.25	241	132	12	17	254	1352	657	2e-60	182
PaASAT3|Ax31629	scaffold-SNBI-2005428-Sambucus_canadensis	28.4	162	101	15	271	427	592	137	2e-60	75.1
PaASAT3|Ax31629	scaffold-EDBB-2087346-Polyscias_fruticosa	32.87	435	260	32	8	418	159	1439	2e-60	211
PaASAT3|Ax31629	scaffold-IHPC-2013556-Platycodon_grandiflorus	33.1	435	266	25	11	427	126	1409	2e-60	212
PaASAT3|Ax31629	scaffold-ZSGF-2074142-ZSGF-Psychotria_ipecacuanha-2_samples_combined	30.65	434	276	25	11	425	164	1447	3e-60	212
PaASAT3|Ax31629	scaffold-JGYZ-2044690-Holarrhena_pubescens	30.23	430	276	24	8	425	98	1351	3e-60	210
PaASAT3|Ax31629	scaffold-OEKO-2012508-OEKO-Heliotropium_filiforme-2_samples_combined	32.08	424	255	33	11	413	1490	2725	3e-60	218
PaASAT3|Ax31629	scaffold-MDJK-2148536-MDJK-Heliotropium_texanum-2_samples_combined	32.46	419	254	29	11	412	1397	177	3e-60	209
PaASAT3|Ax31629	scaffold-PUCW-2049222-Agastache_rugosa	30.59	438	278	26	8	426	73	1365	4e-60	210
PaASAT3|Ax31629	scaffold-GNPX-2012249-Oxera_neriifolia	34.8	408	242	24	11	410	1588	413	4e-60	211
PaASAT3|Ax31629	scaffold-BQEQ-2058168-Psychotria_ipecacuanha-invitro_plantlet	30.65	434	276	25	11	425	1659	376	5e-60	212
PaASAT3|Ax31629	scaffold-SALZ-2068975-Pittosporum_resiniferum-fruit	31.59	421	268	20	18	429	3	1232	5e-60	207
PaASAT3|Ax31629	scaffold-GSZA-2071698-Lonicera_japonica	34.35	329	203	13	1	322	138	1106	5e-60	206
PaASAT3|Ax31629	scaffold-SUVN-2046704-SUVN-Hedera_helix-2_samples_combined	37.31	327	188	17	8	325	156	1112	9e-60	197
PaASAT3|Ax31629	scaffold-SUVN-2046704-SUVN-Hedera_helix-2_samples_combined	31.53	111	66	10	321	431	1123	1425	9e-60	58.2
PaASAT3|Ax31629	scaffold-SIBR-2011900-Celsia_arcturus	31.89	439	266	33	11	426	11	1297	1e-59	207
PaASAT3|Ax31629	scaffold-AFQQ-2009204-Inula_helenium	32.89	450	243	59	2	425	72	1322	1e-59	207
PaASAT3|Ax31629	scaffold-GIOY-2002450-Corokia_cotoneaster	33.33	456	243	61	12	422	1321	2	1e-59	208
PaASAT3|Ax31629	scaffold-FFFY-2014412-Valeriana_officianalis	33.26	427	251	34	8	422	3	1217	2e-59	211
PaASAT3|Ax31629	scaffold-NTEO-2067957-Pittosporum_sahnianum	32.44	447	268	34	8	429	1495	182	2e-59	209
PaASAT3|Ax31629	scaffold-UEEN-2163506-Forestiera_segregata	31.6	424	262	28	11	419	1458	226	2e-59	209
PaASAT3|Ax31629	scaffold-HGSM-2070490-Gelsemium_sempervirens	32.89	450	258	44	8	429	1444	143	3e-59	207
PaASAT3|Ax31629	scaffold-WHNV-2043654-Micromeria_fruticosa	32.43	407	243	32	12	404	43	1209	3e-59	206
PaASAT3|Ax31629	scaffold-XVRU-2049288-XVRU-Heliotropium_calcicola-3_samples_combined	30.93	430	271	26	8	422	145	1401	3e-59	208
PaASAT3|Ax31629	scaffold-HLJG-2036940-Viburnum_odoratissimum	33.49	436	262	28	8	427	95	1366	4e-59	209
PaASAT3|Ax31629	scaffold-MDJK-2148560-MDJK-Heliotropium_texanum-2_samples_combined	31.19	452	258	53	8	427	39	1331	5e-59	207
PaASAT3|Ax31629	scaffold-JOPH-2015430-Psychotria_ipecacuanha-root_culture	30.41	434	277	25	11	425	1593	310	9e-59	207
PaASAT3|Ax31629	scaffold-IPPG-2009446-Heliotropium_filiforme-juvenile_leaf	32.51	446	259	42	8	427	62	1351	9e-59	206
PaASAT3|Ax31629	scaffold-XKVX-2048834-Heliotropium_filiforme-mature_leaf	32.51	446	259	42	8	427	1409	120	1e-58	206
PaASAT3|Ax31629	scaffold-YFQX-2012342-YFQX-Apocynum_androsaemifolium-2_samples_combined	31.64	452	272	37	8	429	1537	203	1e-58	207
PaASAT3|Ax31629	scaffold-OEKO-2063664-OEKO-Heliotropium_filiforme-2_samples_combined	32.51	446	259	42	8	427	1409	120	1e-58	206
PaASAT3|Ax31629	scaffold-WHNV-2043295-Micromeria_fruticosa	30.75	426	260	35	11	419	46	1269	1e-58	204
PaASAT3|Ax31629	scaffold-MGVU-2039523-Allamanda_cathartica	31.24	445	264	42	16	427	1420	113	1e-58	207
PaASAT3|Ax31629	scaffold-MGVU-2039222-Allamanda_cathartica	29.76	457	286	35	3	426	70	1434	1e-58	206
PaASAT3|Ax31629	scaffold-BNTL-2027179-Souroubea_exauriculata	32.28	443	257	43	8	429	297	1559	2e-58	209
PaASAT3|Ax31629	scaffold-HLJG-2016886-Viburnum_odoratissimum	32.94	428	255	32	7	410	1261	2	2e-58	203
PaASAT3|Ax31629	scaffold-ODDO-2102969-Ardisia_humilis	33.1	432	248	41	8	427	68	1276	3e-58	205
PaASAT3|Ax31629	scaffold-GGJD-2020258-Strychnos_spinosa	32.49	437	261	34	14	427	141	1418	4e-58	207
PaASAT3|Ax31629	scaffold-UFQC-2006897-Apocynum_androsaemifolium-B	31.15	443	273	32	8	427	36	1337	4e-58	205
PaASAT3|Ax31629	scaffold-AUIP-2018860-Phelline_lucida	32.44	447	271	31	8	427	221	1549	4e-58	207
PaASAT3|Ax31629	scaffold-TQKZ-2012791-Angelica_archangelica	31.7	448	269	37	6	427	1627	317	5e-58	207
PaASAT3|Ax31629	scaffold-NUSE-2064428-Conzya_canadensis-glyphosate_resistant	31.51	438	265	35	11	426	46	1320	5e-58	204
PaASAT3|Ax31629	scaffold-MHYG-2084131-MHYG-Conzya_canadensis-2_samples_combined	31.51	438	265	35	11	426	1397	123	5e-58	204
PaASAT3|Ax31629	scaffold-VUSY-2135775-Nyssa_ogeche	30.68	427	269	27	8	419	89	1333	6e-58	205
PaASAT3|Ax31629	scaffold-EDEQ-2012051-Wrightia_natalensis	30.39	441	277	30	8	427	326	1621	6e-58	207
PaASAT3|Ax31629	scaffold-GNPX-2012248-Oxera_neriifolia	33.5	403	240	28	11	403	1479	325	6e-58	204
PaASAT3|Ax31629	scaffold-UTQR-2083033-Tabebuia_umbellate	31.99	422	260	27	11	417	1351	122	7e-58	203
PaASAT3|Ax31629	scaffold-XAYK-2019547-XAYK-Kigelia_africana-2_samples_combined	32.86	423	253	31	11	424	1590	388	7e-58	205
PaASAT3|Ax31629	scaffold-QKEI-2055287-Kigelia_africana-B	32.86	423	253	31	11	424	29	1231	7e-58	205
PaASAT3|Ax31629	scaffold-GRFT-2000868-Buddleja_sp.	30.7	456	266	50	11	426	71	1408	1e-57	204
PaASAT3|Ax31629	scaffold-CWYJ-2002436-Heracleum_lanatum	31.6	443	267	36	8	427	371	1660	2e-57	207
PaASAT3|Ax31629	scaffold-WUZV-2063471-Lindenbergia_philippensis-flower	31.44	439	259	42	8	417	70	1347	2e-57	202
PaASAT3|Ax31629	scaffold-UCNM-2010195-Ajuga_reptans	32.52	412	245	33	11	410	28	1200	2e-57	202
PaASAT3|Ax31629	scaffold-DIHD-2095161-Heliotropium_tenellum-juvenile_leaf	38.22	348	198	17	90	427	3	1025	2e-57	201
PaASAT3|Ax31629	scaffold-EJCM-2075219-EJCM-Lindenbergia_philippensis-2_samples_combined	31.44	439	259	42	8	417	1328	51	2e-57	202
PaASAT3|Ax31629	scaffold-ZGDS-2089088-Lactuca_graminifolia-A	31.53	425	266	25	8	413	70	1326	2e-57	201
PaASAT3|Ax31629	scaffold-VTOK-2102794-Orobanche_fasciculata-flower_buds	31.28	438	277	24	8	427	1354	59	2e-57	201
PaASAT3|Ax31629	scaffold-RFSD-2117551-RFSD-Lactuca_graminifolia-2_samples_combined	31.53	425	266	25	8	413	87	1343	3e-57	201
PaASAT3|Ax31629	scaffold-PHOQ-2097099-Orobanche_fasciculata-stem	31.28	438	277	24	8	427	49	1344	3e-57	201
PaASAT3|Ax31629	scaffold-HUQC-2013669-Scaevola_sp.	30.47	430	263	36	16	428	74	1306	3e-57	202
PaASAT3|Ax31629	scaffold-VYDM-2130078-VYDM-Orobanche_fasciculata-2_samples_combined	31.28	438	277	24	8	427	1376	81	3e-57	201
PaASAT3|Ax31629	scaffold-SALZ-2016612-Pittosporum_resiniferum-fruit	33.64	434	252	36	12	427	1472	225	3e-57	203
PaASAT3|Ax31629	scaffold-WUZV-2064078-Lindenbergia_philippensis-flower	31.35	437	276	24	8	427	196	1485	3e-57	203
PaASAT3|Ax31629	scaffold-ZVFS-2057389-Lindenbergia_philippensis-leaves	31.35	437	276	24	8	427	193	1482	3e-57	203
PaASAT3|Ax31629	scaffold-EJCM-2075820-EJCM-Lindenbergia_philippensis-2_samples_combined	31.35	437	276	24	8	427	1457	168	3e-57	203
PaASAT3|Ax31629	scaffold-AXBO-2018101-Sinojackia_xylocarpa	35.48	217	113	27	11	211	145	762	4e-57	129
PaASAT3|Ax31629	scaffold-AXBO-2018101-Sinojackia_xylocarpa	36.16	224	117	26	213	427	780	1400	4e-57	116
PaASAT3|Ax31629	scaffold-JTRM-2091156-Dipsacus_sativum	32.71	428	256	32	12	427	132	1355	5e-57	201
PaASAT3|Ax31629	scaffold-KVFU-2007427-Diospyros_malabarica	32.72	327	203	17	8	325	1469	513	5e-57	173
PaASAT3|Ax31629	scaffold-KVFU-2007427-Diospyros_malabarica	40.45	89	52	1	338	426	484	221	5e-57	72.8
PaASAT3|Ax31629	scaffold-BMSE-2064351-Senecio_rowleyanus	30.5	436	267	36	4	425	103	1344	5e-57	201
PaASAT3|Ax31629	scaffold-MMJI-2090003-Lactuca_graminifolia-B	31.52	422	264	25	8	410	40	1287	7e-57	199
PaASAT3|Ax31629	scaffold-ZVFS-2057305-Lindenbergia_philippensis-leaves	31.44	439	259	42	8	417	101	1378	7e-57	202
PaASAT3|Ax31629	scaffold-YFQX-2069168-YFQX-Apocynum_androsaemifolium-2_samples_combined	31.42	436	266	33	8	424	20	1285	8e-57	201
PaASAT3|Ax31629	scaffold-JCLQ-2044840-Apocynum_androsaemifolium-A	31.42	436	266	33	8	424	1522	257	8e-57	201
PaASAT3|Ax31629	scaffold-DUNJ-2020653-Helenium_autumnale	32.04	437	264	33	8	426	104	1369	9e-57	201
PaASAT3|Ax31629	scaffold-QZZU-2066680-Pyrenacantha_malvifolia	30.23	440	275	32	8	430	1648	374	1e-56	203
PaASAT3|Ax31629	scaffold-DAAD-2041798-Ardisia_revoluta	32.41	432	251	41	8	427	1241	33	1e-56	198
PaASAT3|Ax31629	scaffold-RGMN-2109615-Heliotropium_calcicola-mature_leaf	30.42	457	270	48	2	429	1424	111	1e-56	201
