# Supplementary material for: Evolutionary routes to biochemical innovation revealed by integrative analysis of a plant-defense related specialized metabolic pathway
Source: eLife. 2017 Aug 30;6:e28468. doi: 10.7554/eLife.28468 (PMC5595436; doi:10.7554/eLife.28468)
Supplement: Figure 7—source data 1. — BLASTP or TBLASTN was performed, and only the top hit of a query is shown. Results were used to infer Figure 7A. [file elife-28468-fig7-data1.xlsx]

## Sheet: Sheet2
		Figure 7-Source Data 1	Results of BLAST searches performed using ASAT sequences as queries and multiple databases as subjects. BLASTP or TBLASTN was performed, and only the top hit of a query is shown. Results were used to infer Figure 7A.

## Sheet: SourceData1
Query	Subject	% IDT	Alignment length			Q_start	Q_end	S_start	S_end	E-value	Score
#ASAT vs Capsicum annuum BLASTP
SsASAT5|SS_c48744_g2	Capana07g002453	59.64	441	159	11	1	426	1	437	4e-135	477
Solyc01g105580	Capana08g002066	55.38	437	171	11	1	429	1	421	2e-111	399
Solyc11g067270	Capana11g000314	62.09	430	155	6	1	427	3	427	5e-141	497
Solyc12g006330	Capana00g004879	40.05	437	235	12	1	422	1	425	4e-70	261
Solyc04g012020	Capana05g000314	61.9	336	118	7	111	446	1	326	1e-105	380
PaASAT1|Ax39119	Capana00g004879	71.95	442	111	4	1	429	1	442	3e-180	627
PaASAT2|Ax36474	Capana11g000314	42.95	440	218	10	1	425	3	424	4e-83	305
PaASAT3|Ax31629	Capana05g000314	64.11	326	113	4	107	429	1	325	2e-113	405
PaASAT4|Ax21699	Capana00g004879	35.27	431	256	11	36	457	9	425	1e-63	240
SsASAT2|SS_c49208_g1_i2	Capana00g004879	41.09	404	219	9	1	394	1	395	7e-77	284
SsASAT3|SS_c36223_g1_i1	Capana05g000314	63	327	117	4	108	432	1	325	8e-113	403
SsASAT1|SS_c40486_g1	Capana00g004879	71.26	435	114	5	1	431	1	428	6e-171	596
#ASAT vs Ipomoea trifida BLASTP
PaASAT1|Ax39119	Itrk_sc0004275.1_g000002.1	40.05	427	236	9	1	418	4	419	3e-81	300
PaASAT1|Ax39119	Itrk_sc0011602.1_g000002.1	39.53	296	156	7	4	282	9	298	2e-52	204
PaASAT2|Ax36474	Itrk_sc0004275.1_g000002.1	40.32	434	232	11	1	425	4	419	3e-76	283
PaASAT2|Ax36474	Itrk_sc0011602.1_g000002.1	43.01	279	138	7	6	273	11	279	2e-54	211
PaASAT3|Ax31629	Itrk_sc0004275.1_g000002.1	43.06	418	220	8	15	428	16	419	4e-85	312
PaASAT3|Ax31629	Itrk_sc0011602.1_g000002.1	45.49	277	143	6	7	281	10	280	1e-60	231
PaASAT4|Ax21699	Itrk_sc0004275.1_g000002.1	35.08	439	257	10	26	457	2	419	8e-64	242
PaASAT4|Ax21699	Itrk_sc0011602.1_g000002.1	36.27	284	158	7	31	304	9	279	2e-36	151
SsASAT2|SS_c49208_g1_i2	Itrk_sc0004275.1_g000002.1	38.75	431	240	12	1	422	4	419	7e-67	252
SsASAT2|SS_c49208_g1_i2	Itrk_sc0011602.1_g000002.1	41.1	292	152	6	8	287	13	296	1e-54	211
SsASAT3|SS_c36223_g1_i1	Itrk_sc0004275.1_g000002.1	41.69	427	230	8	8	431	9	419	3e-81	300
SsASAT3|SS_c36223_g1_i1	Itrk_sc0011602.1_g000002.1	46.81	282	135	9	7	284	10	280	2e-56	217
SsASAT1|SS_c40486_g1	Itrk_sc0004275.1_g000002.1	39.95	428	235	7	1	422	3	414	8e-83	305
SsASAT1|SS_c40486_g1	Itrk_sc0000954.1_g000004.1	30.37	428	264	9	9	406	5	428	4e-50	196
#ASAT vs Petunia axillaris BLASTP
SsASAT5|SS_c48744_g2	Peaxi162Scf00583g00516.1	56.94	360	137	9	83	430	42	395	1e-106	383
Solyc01g105580	Peaxi162Scf00188g01311.1	52.98	436	174	14	2	428	14	427	1e-101	367
Solyc11g067270	Peaxi162Scf00636g00042.1	58.33	432	173	5	1	427	1	430	1e-133	473
Solyc12g006330	Peaxi162Scf00047g00235.1	64.99	397	132	5	35	426	1	395	2e-135	478
Solyc04g012020	Peaxi162Scf00133g01113.1	60.74	433	155	9	14	446	33	450	3e-144	508
PaASAT1|Ax39119	Peaxi162Scf00798g00002.1	99.3	429	3	0	1	429	1	429	0	859
PaASAT2|Ax36474	Peaxi162Scf00047g00235.1	98.73	395	5	0	35	429	1	395	0	789
PaASAT3|Ax31629	Peaxi162Scf00133g01113.1	100	430	0	0	1	430	21	450	0	858
PaASAT4|Ax21699	Peaxi162Scf00198g00710.1	100	459	0	0	1	459	1	459	0	930
SsASAT2|SS_c49208_g1_i2	Peaxi162Scf00047g00235.1	67.6	392	124	3	35	423	1	392	2e-147	518
SsASAT2|SS_c36223_g1_i1	Peaxi162Scf00133g01113.1	74.83	433	106	3	1	433	21	450	0	651
SsASAT1|SS_c40486_g1	Peaxi162Scf00798g00002.1	71.66	441	112	6	1	440	1	429	5e-179	624
#ASAT vs Solanum melongena CDS TBLASTN
SsASAT5|SS_c48744_g2	Sme2.5_03875.1_g00005.1	37.44	446	259	14	1	426	13	1305	1e-68	258
Solyc01g105580	Sme2.5_13607.1_g00001.1	49.22	384	194	10	47	429	35	1132	2e-81	300
Solyc11g067270	Sme2.5_01446.1_g00008.1	61.48	431	165	4	1	430	1	1272	5e-137	485
Solyc12g006330	Sme2.5_00196.1_g00018.1	65.08	398	136	6	32	426	1	1023	1e-137	487
Solyc04g012020	Sme2.5_06812.1_g00003.1	42.01	438	247	9	14	444	37	1299	3e-83	306
PaASAT4|Ax21699	Sme2.5_01698.1_g00015.1	39.68	441	251	14	35	460	22	1302	1e-67	255
SsASAT2|SS_c49208_g1_i2	Sme2.5_00196.1_g00018.1	54.71	393	176	7	32	422	1	1011	1e-105	381
SsASAT3|SS_c36223_g1_i1	Sme2.5_05796.1_g00002.1	42.39	427	238	6	13	431	25	1290	1e-91	335
SsASAT1|SS_c40486_g1	Sme2.5_01446.1_g00008.1	38.13	438	265	11	1	432	1	1266	2e-77	287
#ASAT vs H. niger transcripts TBLASTN
SsASAT5|SS_c48744_g2	c40105_g1_i1	59.17	436	168	10	1	426	154	1446	1e-133	475
Solyc01g105580	c56915_g1_i1	53.27	443	202	13	1	438	95	1363	4e-99	360
Solyc11g067270	c58659_g1_i1	38.66	432	254	10	1	421	89	1348	2e-73	275
Solyc12g006330	c61400_g1_i3	67.67	430	135	4	1	426	55	1338	2e-158	557
Solyc04g012020	c61998_g1_i2	66.08	395	134	7	15	409	97	1245	5e-148	493
PaASAT4|Ax21699	c61400_g1_i3	41.32	438	255	6	25	460	46	1335	8e-84	310
SsASAT2|SS_c49208_g1_i2	c61400_g1_i3	70.99	424	121	1	1	422	55	1326	3e-165	580
SsASAT3|SS_c36223_g1_i1	c61998_g1_i2	67.09	395	128	5	4	396	70	1245	1e-159	519
SsASAT1|SS_c40486_g1	c58659_g1_i1	70.07	431	125	6	1	427	89	1354	7e-170	595
#ASAT vs S. nigrum transcripts TBLASTN
PaASAT1|Ax39119	c71009_g1	41.44	432	239	11	1	418	37	1308	5e-82	301
PaASAT2|Ax36474	c63608_g1	73.43	429	112	4	3	429	4	1284	5e-179	624
PaASAT3|Ax31629	c65670_g1	63.41	246	82	4	187	424	591	1328	3e-156	301
PaASAT4|Ax21699	c63608_g1	39.77	435	258	9	30	460	4	1281	3e-79	293
SsASAT2|SS_c49208_g1_i2	c63608_g1	70.45	423	122	3	3	422	4	1272	5e-167	584
SsASAT3|SS_c36223_g1_i1	c65670_g1	62.2	246	86	5	189	427	594	1328	1e-149	290
SsASAT1|SS_c40486_g1	c71009_g1	41.55	438	246	12	1	428	37	1308	4e-81	299
SsASAT5|SS_c48744_g2	c65306_g1	34.19	468	268	20	1	428	75	1412	1e-54	211
Solyc01g105580	c60145_g1	55.33	441	194	7	1	438	104	1375	3e-116	416
Solyc11g067270	c71009_g1	63.66	432	155	4	1	430	37	1326	2e-145	513
Solyc12g006330	c63608_g1	80.09	427	82	1	3	426	4	1284	0	663
Solyc04g012020	c65670_g1	71.21	257	72	2	186	440	567	1328	0	358
