# Supplementary material for: Evolutionary routes to biochemical innovation revealed by integrative analysis of a plant-defense related specialized metabolic pathway
Source: eLife. 2017 Aug 30;6:e28468. doi: 10.7554/eLife.28468 (PMC5595436; doi:10.7554/eLife.28468)
Supplement: Figure 7—source data 2. — Grey and red colors indicate non-tandem and tandem-duplicated genes, respectively, as identified by MCScanX. Comparisons between tomato and Solanum phureja are based on results of a manual analysis performed using the GBrowse utility on the SpudDB database. [file elife-28468-fig7-data2.xlsx]

## Sheet: MAIN
		Figure 7-Source Data 2	Syntenic blocks between pairs of species identified by MCScanX. Grey and red colors indicate non-tandem and tandem-duplicated genes, respectively, as identified by MCScanX. Comparisons between tomato and Solanum phureja are based on results of a manual analysis performed using the GBrowse utility on the SpudDB database.

## Sheet: SourceData2
	Petunia	Capsicum													Capsicum	Tomato	Capsicum paralogs	Tomato			Capsicum	Tomato	S. phureja syntenic gene models (SpudDB)
PaASAT1	Peaxi162Scf00798g00002	Capana00g004878													Capana00g004858	Solyc06g065140					Capana00g004873	Solyc06g065030	Sotub06g019900
	Peaxi162Scf00798g00114	Capana00g004876													Capana00g004859	| |					Capana00g004874	| |
	Peaxi162Scf00798g00113	Capana00g004875													Capana00g004860	| |					Capana00g004875	Solyc06g065020	Sotub06g019910
	Peaxi162Scf00798g00028	Capana00g004873													Capana00g004861	| |					Capana00g004876	Solyc06g064960	Sotub06g019940-20030 (multiple gene models are orthologs)
	Peaxi162Scf00798g00027	Capana00g004871													Capana00g004862	Solyc06g065100					Capana00g004877	| |
	Peaxi162Scf00798g00322	Capana00g004870													Capana00g004865	| |			Orthologs of PaASAT1	truncated	Capana00g004878	| |
	Peaxi162Scf00798t00031	| |													Capana00g004866	| |				full-length	Capana00g004879	| |
	Peaxi162Scf00798g00034	Capana00g004867													Capana00g004867	Solyc06g065060					Capana00g004880	| |	No gene in between
	Peaxi162Scf00798g00318	Capana00g004865													Capana00g004868	| |					Capana00g004881	| |
	Peaxi162Scf00798g00320														Capana00g004869	| |					Capana00g004882	| |
															Capana00g004870	Solyc06g065050					Capana00g004883	Solyc06g064940	Sotub06g020040
															Capana00g004871	Solyc06g065040					Capana00g004884	| |
		Best BLASTP matches vs tomato (not identified as syntenic)													Capana00g004872	| |					Capana00g004886	Solyc06g064920
	Petunia	Tomato													Capana00g004873	Solyc06g065030					Capana00g004887	Solyc06g064910
PaASAT1	Peaxi162Scf00798g00002	NA													Capana00g004874	| |
	Peaxi162Scf00798g00114	Solyc06g065010													Capana00g004875	Solyc06g065020
	Peaxi162Scf00798g00113	Solyc06g065020													Capana00g004876	Solyc06g064960
	Peaxi162Scf00798g00028	Solyc11g022540,Solyc06g065030,Solyc10g044480													Capana00g004877	| |
	Peaxi162Scf00798g00027	Solyc06g065040											Orthologs of PaASAT1	truncated	Capana00g004878	| |
	Peaxi162Scf00798g00322	Solyc06g065050												full-length	Capana00g004879	| |
	Peaxi162Scf00798t00031	NA													Capana00g004880	| |
	Peaxi162Scf00798g00034	NA													Capana00g004881	| |
	Peaxi162Scf00798g00318	NA													Capana00g004882	| |
	Peaxi162Scf00798g00320	NA													Capana00g004883	Solyc06g064940
															Capana00g004884	| |
															Capana00g004886	Solyc06g064920	Capana01g002455
															Capana00g004887	Solyc06g064910	| |
															Capana00g004888	| |	| |	Solyc06g063380
															Capana00g004889	| |	| |	| |
															Capana00g004890	Solyc06g064890	Capana01g002486	| |
															Capana00g004891	Solyc06g064880	| |	| |
															Capana00g004892	| |	Capana01g002489	| |
															Capana00g004894	| |	Capana01g002494	| |
															Capana00g004895	Solyc06g064870	Capana01g002495	| |
															Capana00g004896	Solyc06g064860	Capana01g002499	| |
															Capana00g004897	Solyc06g064850
