# Supplementary material for: Evolutionary routes to biochemical innovation revealed by integrative analysis of a plant-defense related specialized metabolic pathway
Source: eLife journal article supplement (doi:10.7554/elife.28468), 2017-08-29
Supplement: supp [file elife-28468-supp-v1.zip]

**Figure 4-Figure Supplement 3**

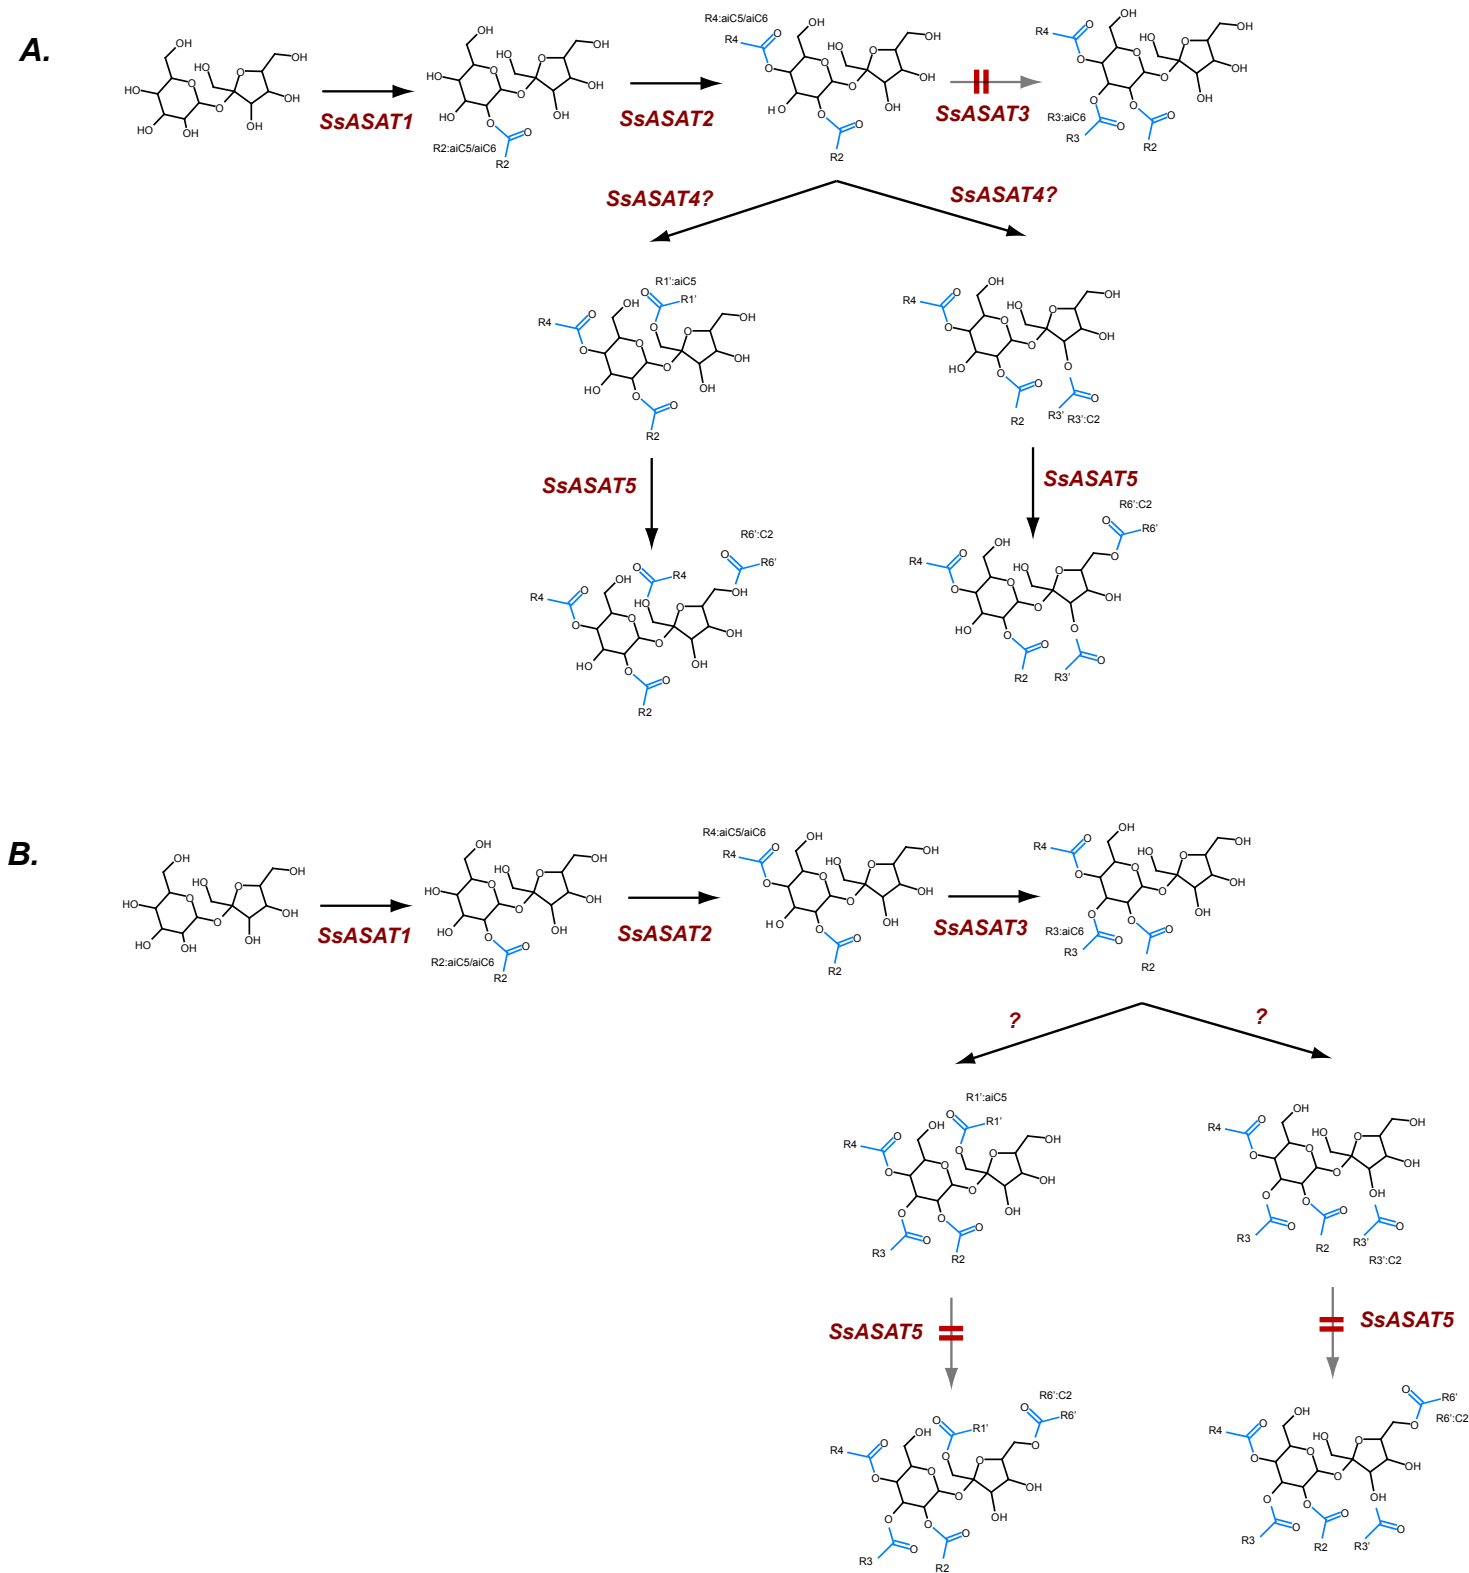

**Figure 4-Figure Supplement 3: Hypothesized routes of metabolite flow in VIGS knockdown plants. (A)** SsASAT3 knockdown and **(B)** SsASAT5 knockdown. The perturbed pathway steps are denoted by a blurred arrow and two red lines. All acylation positions are hypothesized based on *in vitro* data and knowledge of the enzyme activities
