# Supplementary material for: Evolutionary routes to biochemical innovation revealed by integrative analysis of a plant-defense related specialized metabolic pathway
Source: eLife journal article supplement (doi:10.7554/elife.28468), 2017-08-29
Supplement: supp [file elife-28468-supp-v1.zip]

Figure 6-Figure Supplement 1

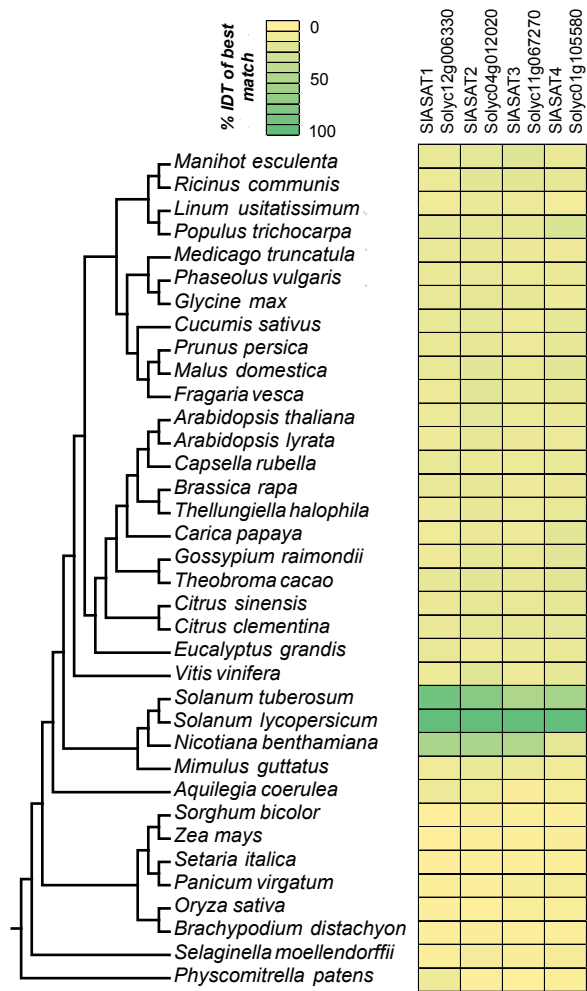

Figure 6- Figure Supplement 1: The phylogenetic context of tomato ASATs. Results of protein BLAST (BLASTP) between SIA SAT sequences and proteomes of each species in the Phytozome database. The % identity (% IDT) values for the top BLASTP hits in each species are shown.
