# Supplementary material for: Evolutionary routes to biochemical innovation revealed by integrative analysis of a plant-defense related specialized metabolic pathway
Source: eLife journal article supplement (doi:10.7554/elife.28468), 2017-08-29
Supplement: supp [file elife-28468-supp-v1.zip]

**Figure 3-Figure Supplement 1**

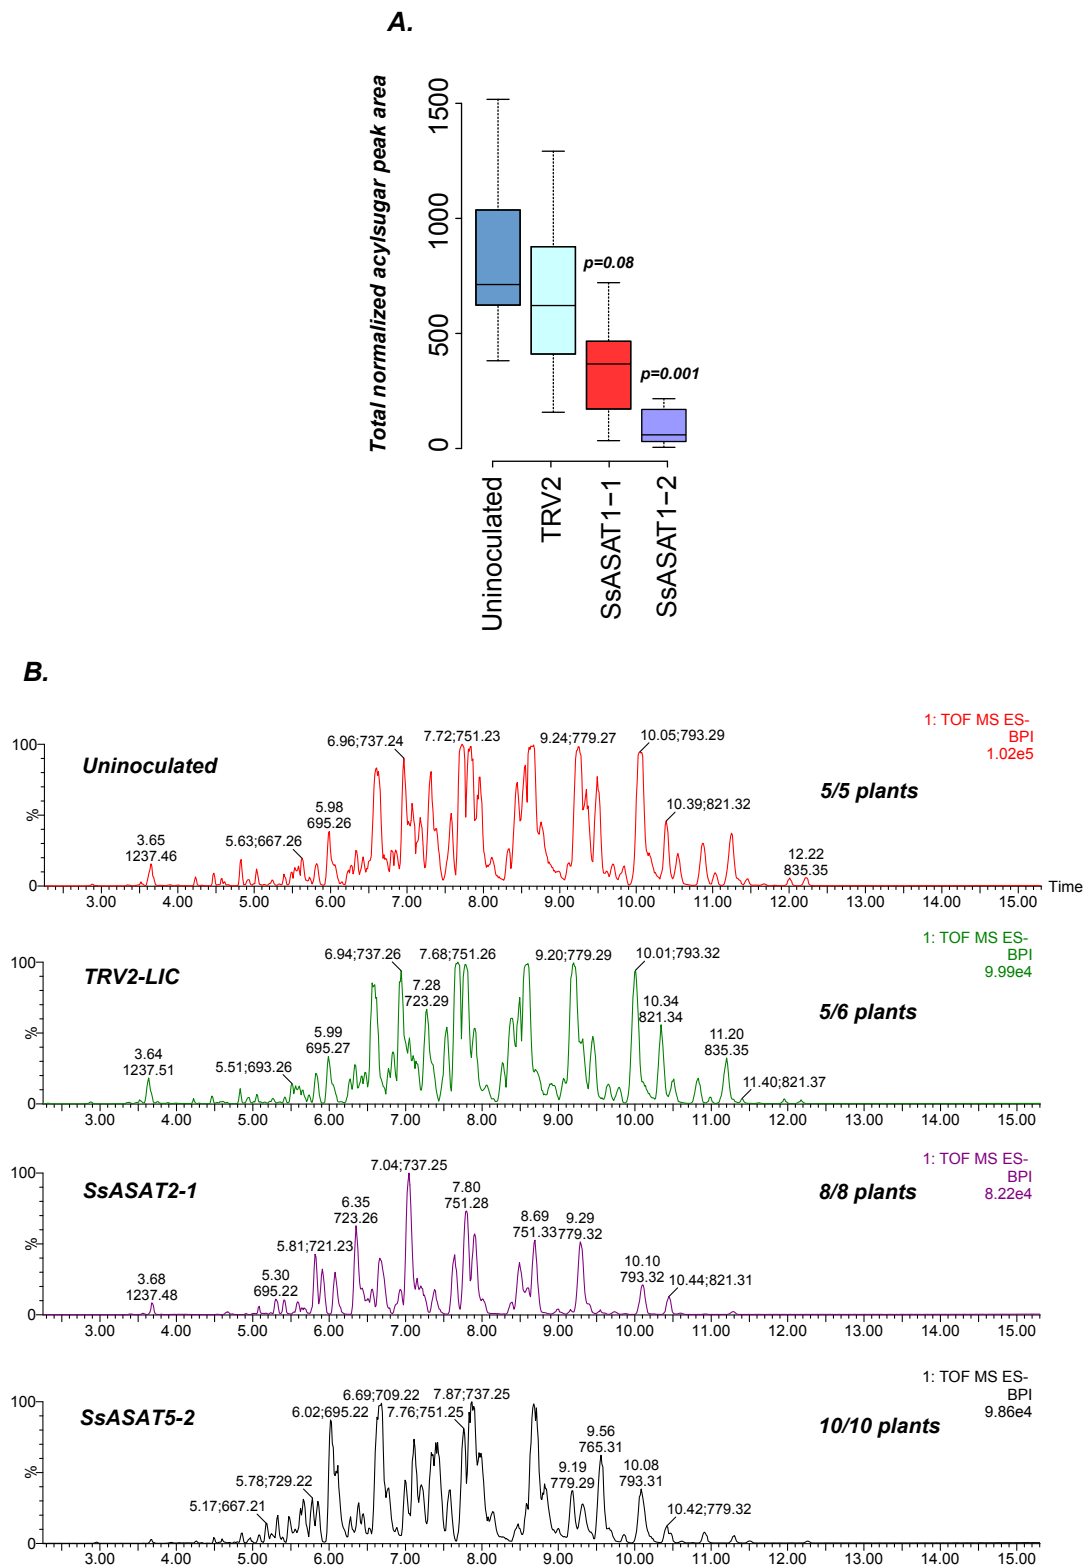

**Figure 3-Figure Supplement 1: Results of knockdown of SsASAT1, SsASAT2 and SsASAT5 transcripts in a distinct replication of VIGS experiments.** (A) SsASAT1 knockdown shows reduction of acylsugar levels. (B) SsASAT2 and SsASAT5 knockdown causes substantial changes in *Salpiglossis* acylsugar profiles. The accumulating acylsugars in these two knockdowns are different, as seen by the co-eluting *m/z* ratios. Number of plants showing depicted phenotype out of the total number of analyzed plants is noted on the right side of each chromatogram.
