# Supplementary material for: Evolutionary routes to biochemical innovation revealed by integrative analysis of a plant-defense related specialized metabolic pathway
Source: eLife journal article supplement (doi:10.7554/elife.28468), 2017-08-29
Supplement: supp [file elife-28468-supp-v1.zip]

**Figure 1-Figure Supplement 2**

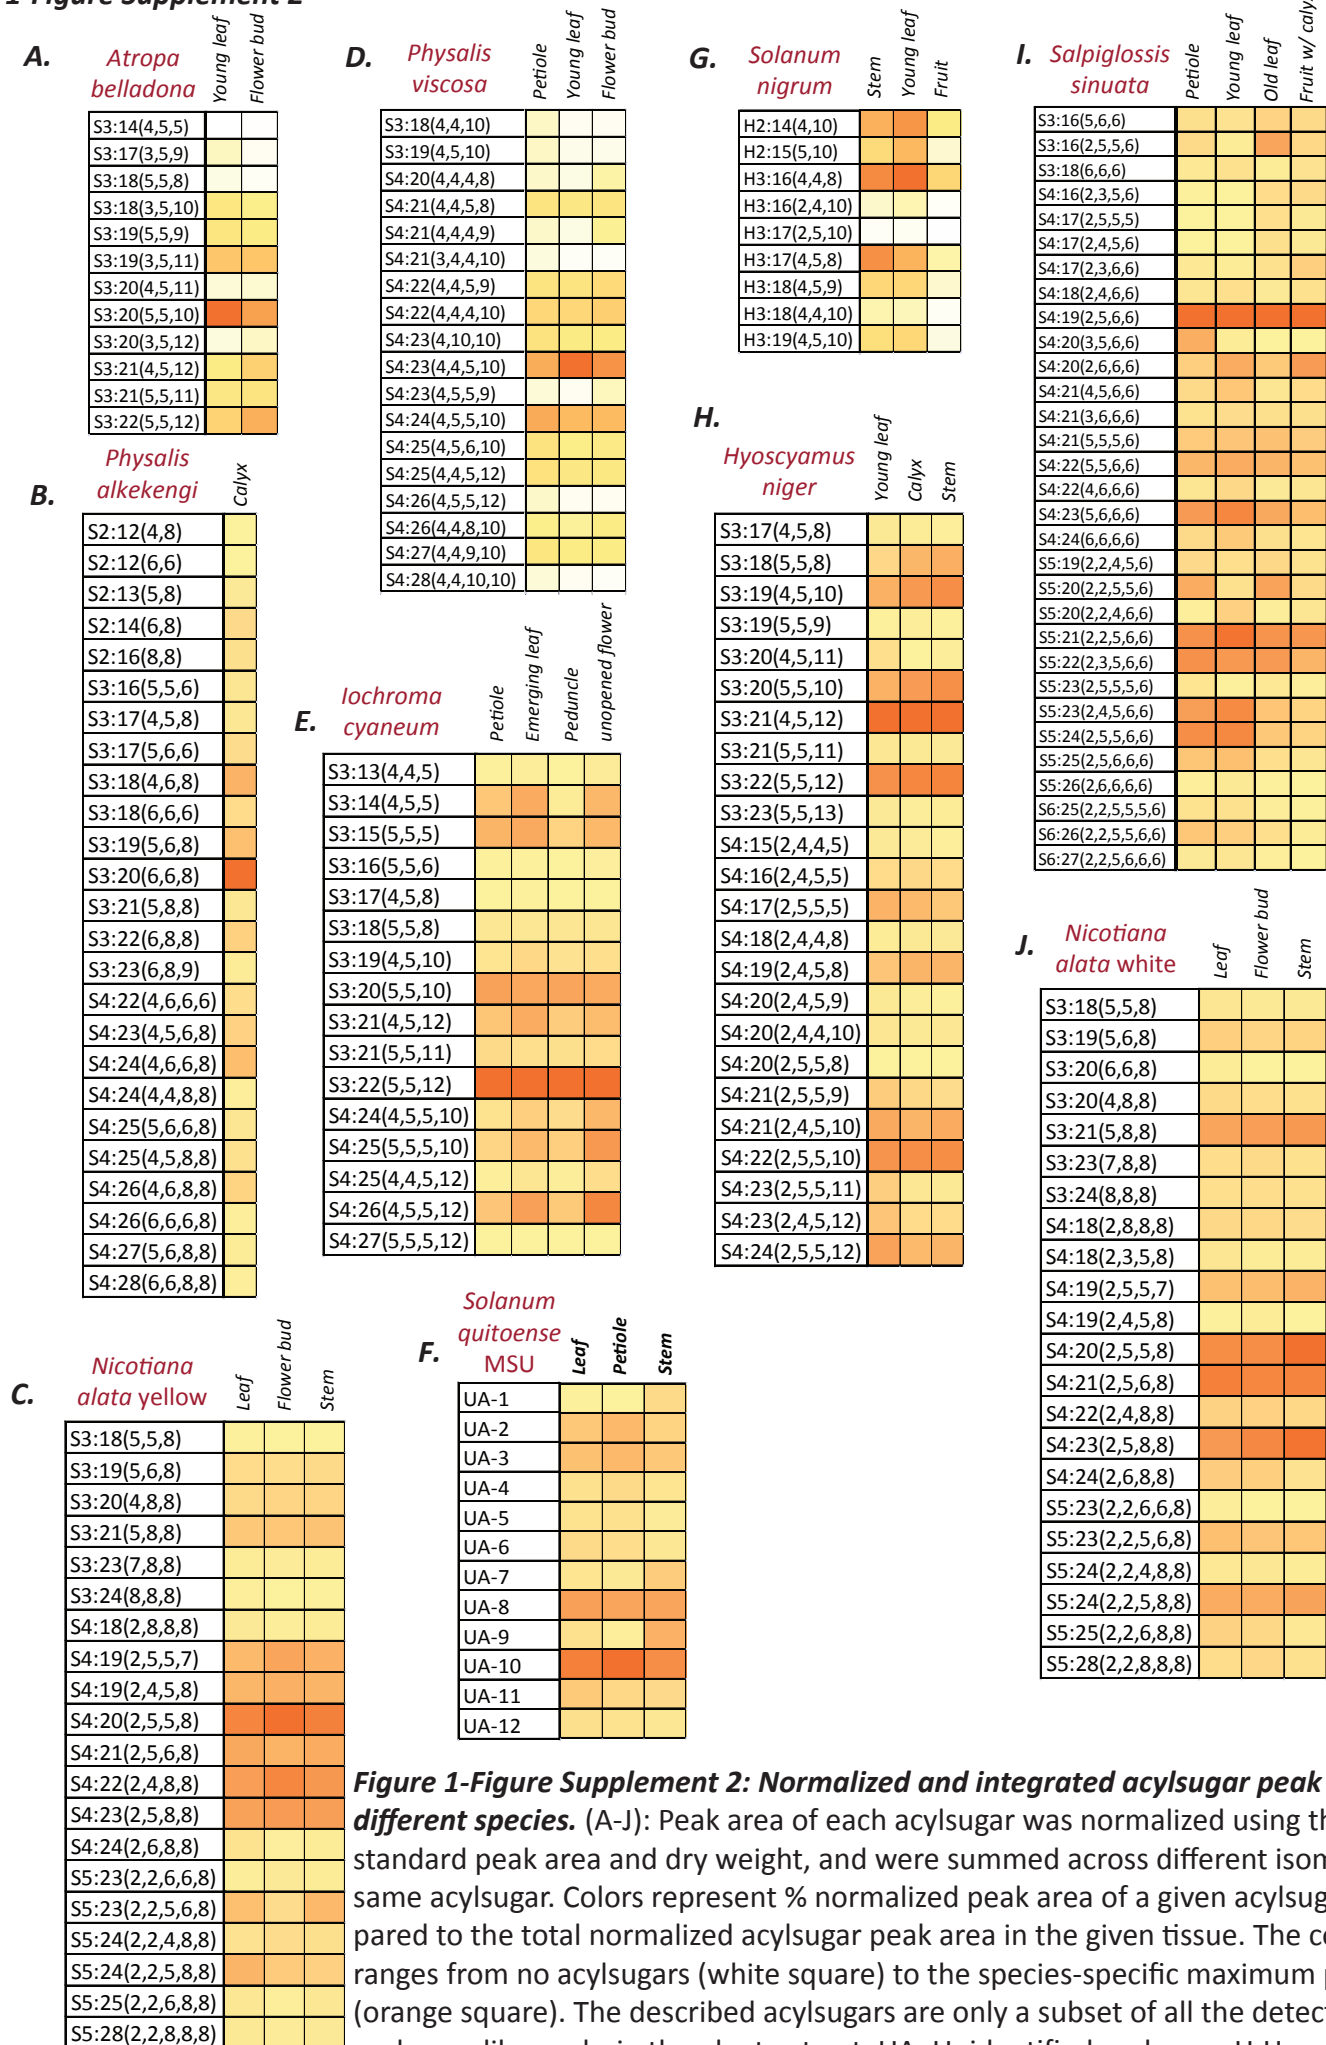

**Figure 1-Figure Supplement 2: Normalized and integrated acylsugar peak areas in different species.** (A-J): Peak area of each acylsugar was normalized using the internal standard peak area and dry weight, and were summed across different isomers of the same acylsugar. Colors represent % normalized peak area of a given acylsugar compared to the total normalized acylsugar peak area in the given tissue. The color scale ranges from no acylsugars (white square) to the species-specific maximum peak area (orange square). The described acylsugars are only a subset of all the detectable acylsugar-like peaks in the plant extract. UA: Unidentified acylsugar, H:Hexose
