# Supplementary material for: Evolutionary routes to biochemical innovation revealed by integrative analysis of a plant-defense related specialized metabolic pathway
Source: eLife journal article supplement (doi:10.7554/elife.28468), 2017-08-29
Supplement: supp [file elife-28468-supp-v1.zip]

## Figure 6-Figure Supplement 4

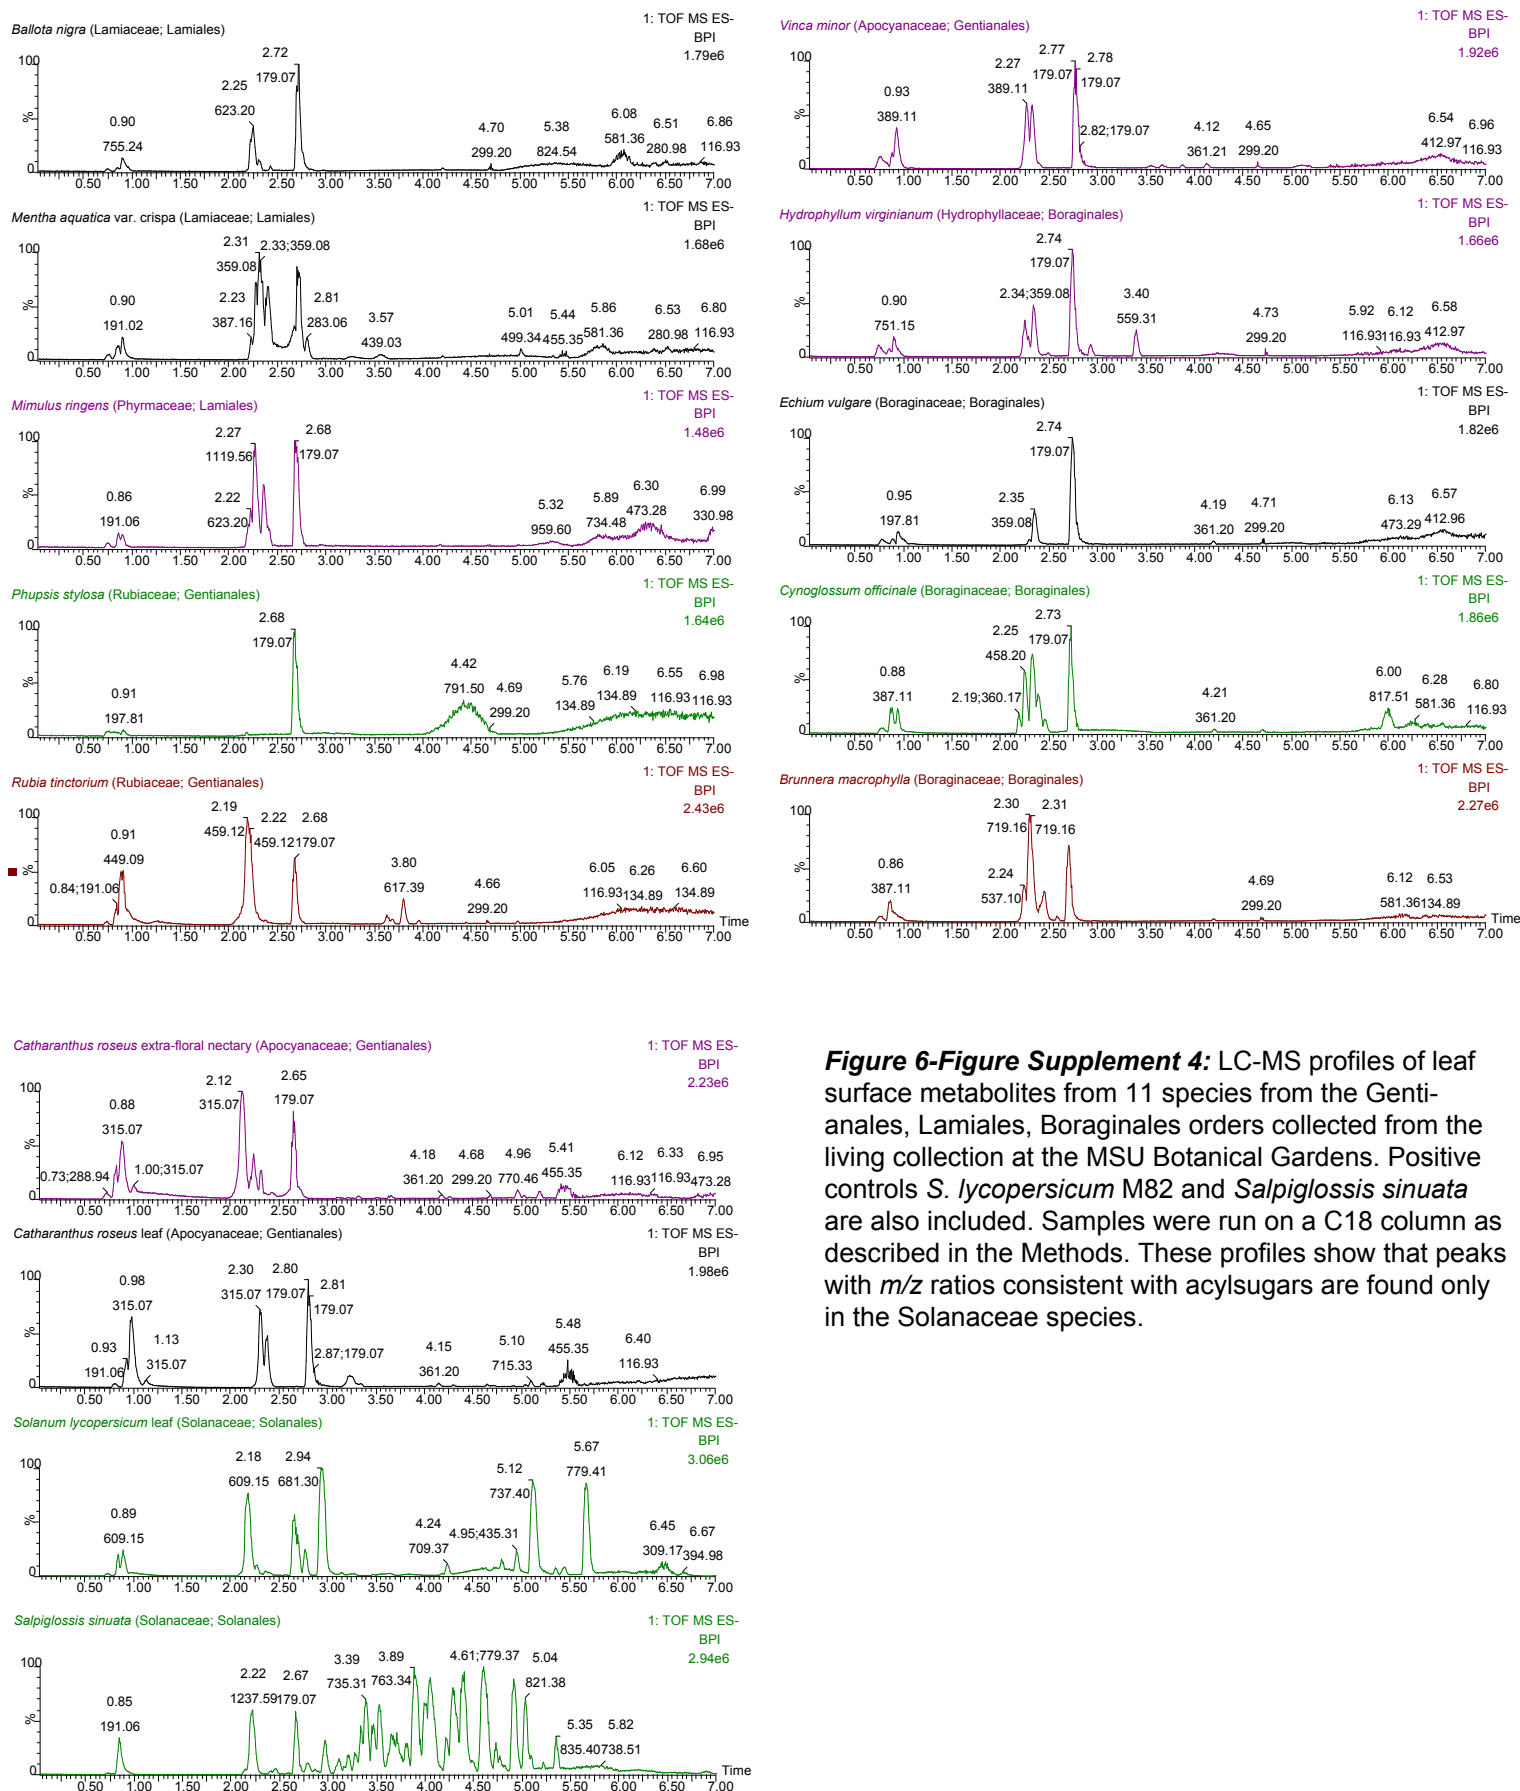

**Figure 6-Figure Supplement 4:** LC-MS profiles of leaf surface metabolites from 11 species from the Gentianales, Lamiales, Boraginales orders collected from the living collection at the MSU Botanical Gardens. Positive controls *S. lycopersicum* M82 and *Salpiglossis sinuata* are also included. Samples were run on a C18 column as described in the Methods. These profiles show that peaks with  $m/z$  ratios consistent with acylsugars are found only in the Solanaceae species.
