# Supplementary material for: Evolutionary routes to biochemical innovation revealed by integrative analysis of a plant-defense related specialized metabolic pathway
Source: eLife journal article supplement (doi:10.7554/elife.28468), 2017-08-29
Supplement: supp [file elife-28468-supp-v1.zip]

Figure 6-Figure Supplement 3

A. 1kp tree - Within Solanaceae

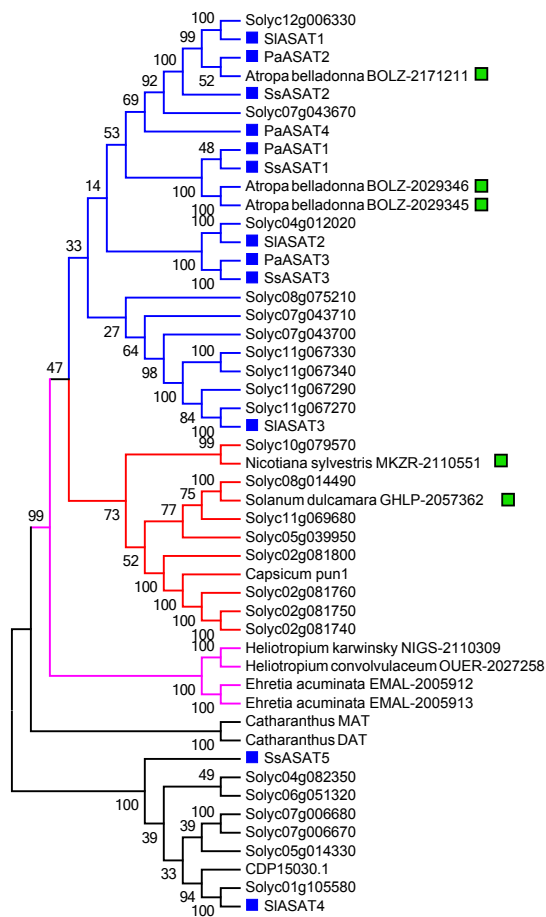

B. NCBI - Within Solanaceae

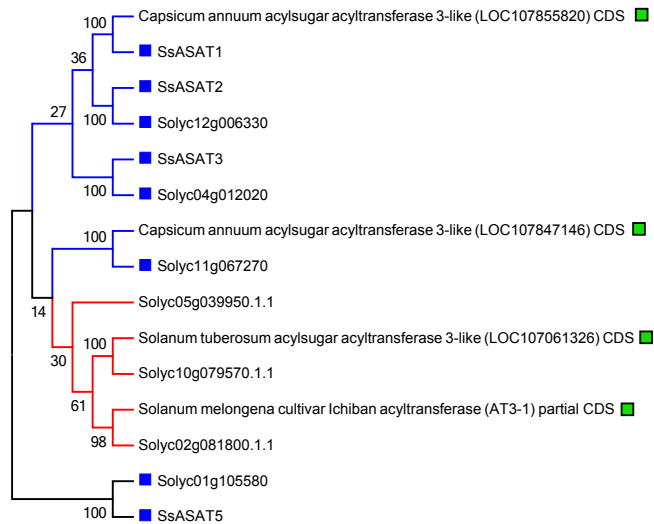

C. Petunia+Convolvulaceae

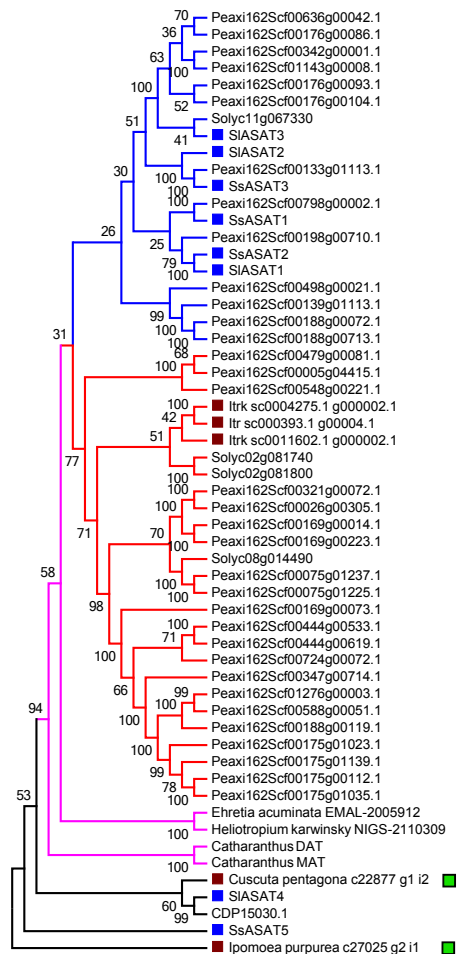

**Figure 6-Figure Supplement 3: Additional related sequences do not affect our inferences regarding ASAT clade emergence.** Hits obtained using various BLAST strategies (A,B) and using Petunia Clade III BAHDs (C) are shown in a phylogenetic context with ASATs and other relevant homologs. The novel hits that were not included in the final gene tree in Fig. 6 are shown by a green square. All trees were generated using NJ, using the JTT model with 100 bootstraps. All sites with <80% coverage were eliminated.
