# Supplementary material for: Evolutionary routes to biochemical innovation revealed by integrative analysis of a plant-defense related specialized metabolic pathway
Source: eLife journal article supplement (doi:10.7554/elife.28468), 2017-08-29
Supplement: supp [file elife-28468-supp-v1.zip]

## Figure 1-Figure Supplement 5

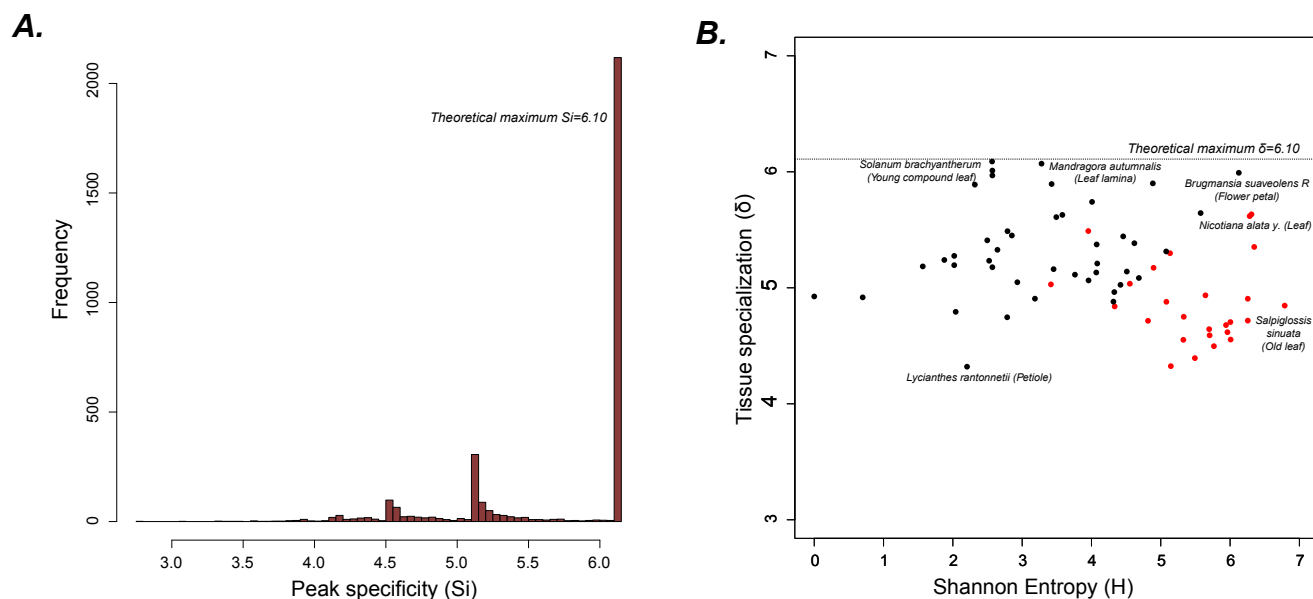

**Figure 1-Figure Supplement 5: Peak and tissue specialization** (A) As shown in Figure 1G, the peaks are largely limited to single samples. Hence, the peak specificity ( $S_i$ ) is at the theoretical maximum. (B) A plot of tissue specialization vs Shannon Entropy shows that in general, tissue specialization is quite high, consistent with the results in Figure 1G. However, acylsugar producing species (red dots) have a slightly lower specialization than non-producers likely because overall, more peaks are shared between acylsugar producing species than non-producers, as can be seen in Source Data 4.
