# Supplementary material for: Evolutionary routes to biochemical innovation revealed by integrative analysis of a plant-defense related specialized metabolic pathway
Source: eLife journal article supplement (doi:10.7554/elife.28468), 2017-08-29
Supplement: supp [file elife-28468-supp-v1.zip]

**Figure 2-Figure Supplement 2: Trichome preferentially expressed BAHD enzymes**

| Candidate<br>(Trinity<br>assembler<br>given<br>names) | Homolog                         | Trichome<br>1 (# of<br>reads) | Trichome<br>2 (# of<br>reads) | Stem<br>1 (# of<br>reads) | Stem<br>2 (# of<br>reads) | Status                                                 |
|-------------------------------------------------------|---------------------------------|-------------------------------|-------------------------------|---------------------------|---------------------------|--------------------------------------------------------|
| <b>c40486_g1</b>                                      | PaASAT1                         | 3856                          | 1000                          | 46                        | 10                        | SsASAT1                                                |
| <b>c49208_g1</b>                                      | SI_ASAT1/PaASAT2                | 5310                          | 1851                          | 39                        | 7                         | SsASAT2                                                |
| <b>c36223_g2</b>                                      | SI_ASAT2/PaASAT3                | 5987                          | 1792                          | 51                        | 13                        | SsASAT3                                                |
| <b>c48744_g1</b>                                      | Solyc01g008330                  | 5045                          | 940                           | 29                        | 7                         | SsASAT5                                                |
| <b>c49704_g1</b>                                      | Solyc08g078030                  | 3817                          | 1200                          | 56                        | 17                        | NAD                                                    |
| <b>c58191_g3</b>                                      | Solyc02g081740                  | 3360                          | 1086                          | 30                        | 14                        | NAD                                                    |
| <b>c57127_g2</b>                                      | Solyc05g014330                  | 25699                         | 5624                          | 112                       | 25                        | NAD                                                    |
| <b>c57127_g3</b>                                      | Solyc05g014330                  | 6094                          | 2073                          | 44                        | 15                        | NAD                                                    |
| <b>c52698_g1</b>                                      | Solyc09g092270                  | 7940                          | 4810                          | 528                       | 436                       | NAD                                                    |
| <b>c49383_g1</b>                                      | Solyc08g005760                  | 15113                         | 7133                          | 108                       | 31                        | Not tested                                             |
| <b>c50879_g1</b>                                      | Solyc12g087980                  | 2849                          | 1162                          | 458                       | 235                       | No DFGWG/HxxxxD<br>→ Abandoned                         |
| <b>c41764_g1</b>                                      | Solyc06g051320<br>(ASAT4 clade) | 465                           | 231                           | 90                        | 31                        | Not cloned (not highly<br>differentially<br>expressed) |
| <b>c42979_g2</b>                                      | NA                              | 445                           | 157                           | 12                        | 5                         | Not cloned (not highly<br>differentially<br>expressed) |

NAD: No Activity Detected *in vitro*
