# Supplementary material for: Evolutionary routes to biochemical innovation revealed by integrative analysis of a plant-defense related specialized metabolic pathway
Source: eLife journal article supplement (doi:10.7554/elife.28468), 2017-08-29
Supplement: supp [file elife-28468-supp-v1.zip]

**Figure 4-Figure Supplement 1**

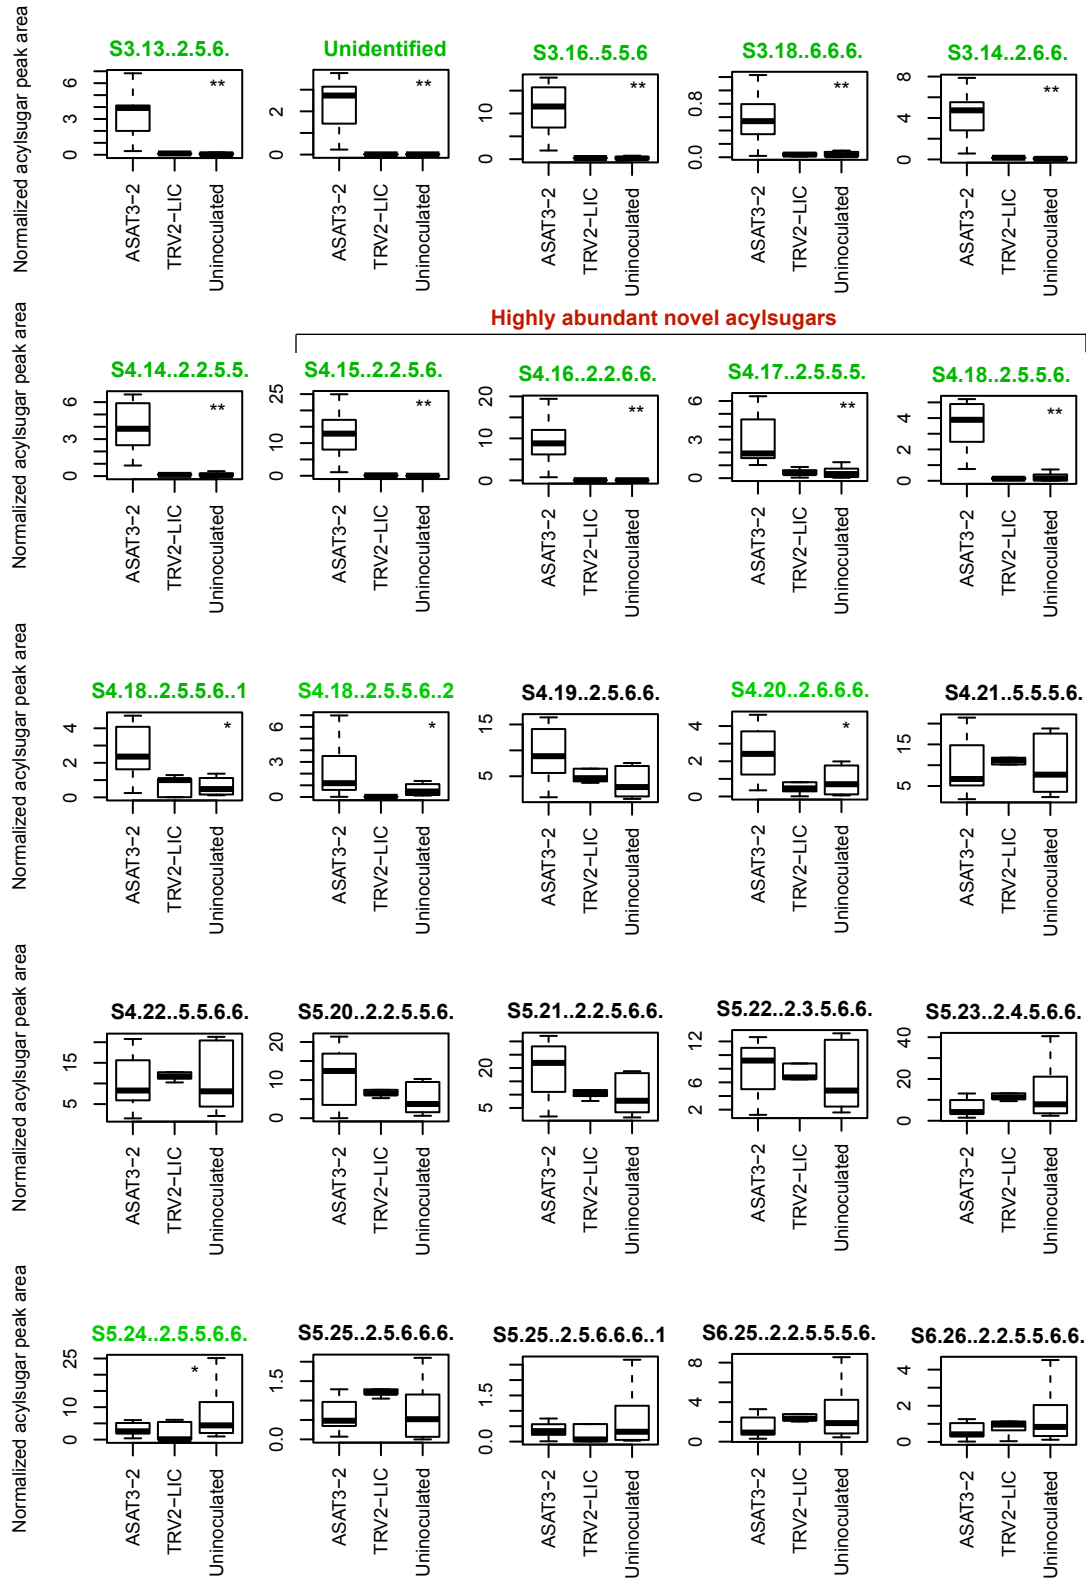

**Figure 4-Figure Supplement 1: *SsASAT3* knockdown boxplots for levels of individual acylsugars.** Statistical significance of the difference between TRV2-LIC and ASAT3-2 was tested using Kolmogorov-Smirnov test. \*\* represents  $p < 0.01$  and \* represents  $p < 0.05$ . Boxes where the acylsugars had significantly different levels compared to TRV2-LIC are highlighted in green. Acylsugar peak area was normalized as described in the Methods.
