# Supplementary material for: Evolutionary routes to biochemical innovation revealed by integrative analysis of a plant-defense related specialized metabolic pathway
Source: eLife journal article supplement (doi:10.7554/elife.28468), 2017-08-29
Supplement: supp [file elife-28468-supp-v1.zip]

**Figure 1-Figure Supplement 6: Description of the LC gradients used in this study.** First column includes the method run time and the column used.

| <b>7min-C18</b> | <b>Flow<br/>(mL/min)</b> | <b>%A</b> | <b>%B</b> | <b>Curve</b> |                                           |            |
|-----------------|--------------------------|-----------|-----------|--------------|-------------------------------------------|------------|
| Initial         | 0.3                      | 95        | 5         | Initial      | A: Water+0.1% Formic acid                 | (-ve mode) |
| 1               | 0.3                      | 40        | 60        | 6            | A: 10mM ammonium formate in water, pH 2.8 | (+ve mode) |
| 5               | 0.3                      | 0         | 100       | 6            | B: Acetonitrile                           |            |
| 6               | 0.3                      | 0         | 100       | 6            |                                           |            |
| 6.01            | 0.3                      | 95        | 5         | 6            |                                           |            |
| 7               | 0.3                      | 95        | 5         | 6            |                                           |            |

| <b>22min-C18</b> | <b>Flow<br/>(mL/min)</b> | <b>%A</b> | <b>%B</b> | <b>Curve</b> |                                           |            |
|------------------|--------------------------|-----------|-----------|--------------|-------------------------------------------|------------|
| Initial          | 0.3                      | 90        | 10        | Initial      | A: Water+0.1% Formic acid                 | (-ve mode) |
| 7                | 0.3                      | 40        | 60        | 6            | A: 10mM ammonium formate in water, pH 2.8 | (+ve mode) |
| 15               | 0.3                      | 0         | 100       | 6            | B: Acetonitrile                           |            |
| 20               | 0.3                      | 0         | 100       | 6            |                                           |            |
| 20.01            | 0.3                      | 90        | 10        | 6            |                                           |            |
| 22               | 0.3                      | 90        | 10        | 6            |                                           |            |

| <b>110min-C18</b> | <b>Flow<br/>(mL/min)</b> | <b>%A</b> | <b>%B</b> | <b>Curve</b> |                                           |            |
|-------------------|--------------------------|-----------|-----------|--------------|-------------------------------------------|------------|
| Initial           | 0.3                      | 99        | 1         | Initial      | A: Water+0.1% Formic acid                 | (-ve mode) |
| 1                 | 0.3                      | 99        | 1         | 6            | A: 10mM ammonium formate in water, pH 2.8 | (+ve mode) |
| 100               | 0.3                      | 20        | 80        | 6            | B: Acetonitrile                           |            |
| 101               | 0.3                      | 0         | 100       | 6            |                                           |            |
| 105               | 0.3                      | 0         | 100       | 6            |                                           |            |
| 106               | 0.3                      | 99        | 1         | 6            |                                           |            |
| 110               | 0.3                      | 99        | 1         | 6            |                                           |            |

| <b>9min-BEH<br/>amide</b> | <b>Flow<br/>(mL/min)</b> | <b>%A</b> | <b>%B</b> | <b>Curve</b> | A: Water+0.1% Formic acid |
|---------------------------|--------------------------|-----------|-----------|--------------|---------------------------|
| Initial                   | 0.3                      | 5         | 95        | Initial      | B: Acetonitrile           |
| 1                         | 0.3                      | 5         | 95        | 6            |                           |
| 6                         | 0.3                      | 40        | 60        | 6            |                           |
| 7                         | 0.3                      | 95        | 5         | 6            |                           |
| 7.01                      | 0.3                      | 5         | 95        | 6            |                           |
| 9                         | 0.3                      | 5         | 95        | 6            |                           |
