# Supplementary material for: Evolutionary routes to biochemical innovation revealed by integrative analysis of a plant-defense related specialized metabolic pathway
Source: eLife journal article supplement (doi:10.7554/elife.28468), 2017-08-29
Supplement: supp [file elife-28468-supp-v1.zip]

**Figure 6-Figure Supplement 2**

**A.**

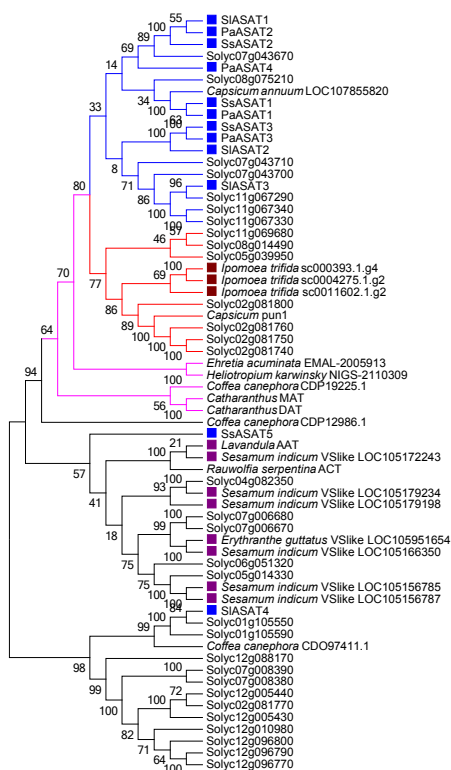

***B.***

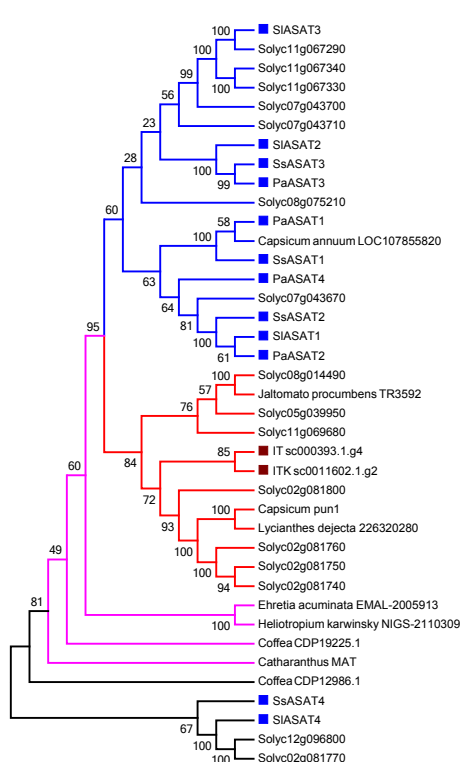

**C.**

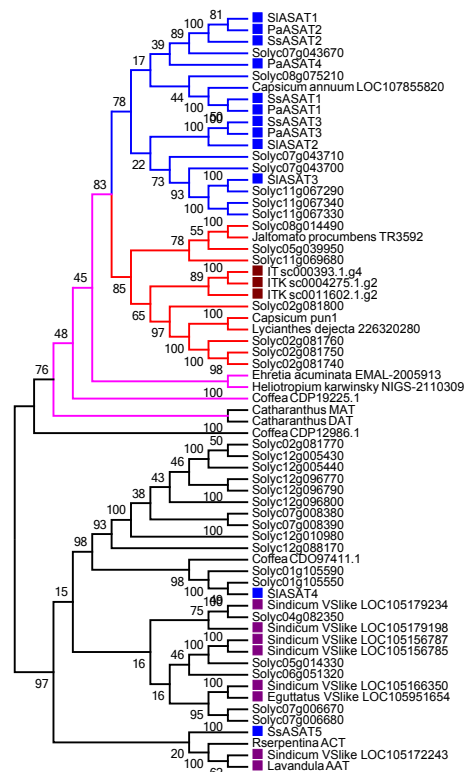

**Figure 6-Figure Supplement 2: Robustness of the phylogenetic relationships.** (A) A maximum likelihood tree obtained using the best model (JTT+G+I+F with 5 rate categories) as per maximum likelihood based search of multiple models. Sites with <70% coverage were deleted. (B) NJ tree using mostly the sequences in the pink+blue+red clade, with 100% site coverage and JTT model (C) NJ tree of all the sequences obtained using JTT. Only sites with 100% coverage were used for this analysis. Please see Fig. 6A for explanation of the various branch and label colors. Bootstrap support values are a result of 100 iterations.
