# Supplementary material for: Evolutionary routes to biochemical innovation revealed by integrative analysis of a plant-defense related specialized metabolic pathway
Source: eLife journal article supplement (doi:10.7554/elife.28468), 2017-08-29
Supplement: supp [file NYBG_DryWeights.xlsx]

## Sheet: Sheet1
Sample ID	Weight (mg)
A12145	17.9
A12152	26	pet
A12166	8.1
A12187	11.7
A12194	7.5
A12222	39.5	infl
A12236	21.5
A12215	8.4
A12179	14.4
A12165	26.9
A12159	19.6
A12174	27.1
A12172	15.1
A12186	9.2
A12229	10.8
A12243	12.6
A12144	14.1
A12208	15.4	orange flower/fruit
A12151	3.5
A12158	18
A12191	8.3
A12234	9.7
A12241	4.7
A12192	15.2
A12248	7
A12540	6.3
A12227	7
A12250	13.2
A12193	24
A12201	57.1	stem/pet
A12247	9
A12184	15.1
A12603	17.8
A12553	16
A12609	14.1
A12610	31.8
A12546	14.5
A12096	23.2	bud
A12257	18.6
A12156	9.4
A12547	13.5
A12596	14.7
A12539	9.2
A12212	10.8
A12255	12.5	flower
A12595	12.2
A12082	7.2
A12538	7.7
A12602	20.4
A12545	5.6
A12181	5.148
A12153	10.846
A12228	5.678
A12164	15.488
A12143	13.64
A12171	4.736
A12251	12.408
A12244	6.386
A12237	20.612
A12188	7.642
A12160	9.104
A12146	7.194
A12167	11.946
A12195	17.92
A12185	6.88
A12205	5.968
A12256	14.422
A12249	13.548
A12180	8.726
A12173	3.368
A12223	10.684
A12216	8.744
A12209	23.83
A12202	7.886
A12178	8.902
A12235	19.776
A12142	13.304
A12198	49.714
A12199	7.302
A12207	5.112
A12220	33.128
A12157	5.312
A12242	8.516
A12214	14.256
A12221	5.114
A12213	10.81
A12129	4.272
A12149	25.386
A12040	5.91
A12026	8.532
A12033	25.794
A12554	7.776
A12372	3.688
A12073	15.208
A12552	10.264
A12074	2.666
A12089	2.618
A12200	22.342
A12150	10.718
A12206	9.734
