# Supplementary material for: Evolutionary routes to biochemical innovation revealed by integrative analysis of a plant-defense related specialized metabolic pathway
Source: eLife journal article supplement (doi:10.7554/elife.28468), 2017-08-29
Supplement: supp [file SampleList.xlsx]

## Sheet: samplesList.3col
#Run2_ID	LC_vial_ID	SpeciesName	Tissue	Concatenated
		Acylsugar non-producers
111813_22	A12686	Solanum brachyantherum	Young compound leaf	Solanum brachyantherum (Young compound leaf)
111813_63	A12743	Solanum conocarpum	Old leaf near midrib	Solanum conocarpum (Old leaf near midrib)
111813_64	A12750	Solanum conocarpum	Petiole	Solanum conocarpum (Petiole)
111813_65	A12757	Solanum conocarpum	Stem	Solanum conocarpum (Stem)
111813_31	A12700	Solanum eutuberosum	Petiole	Solanum eutuberosum (Petiole)
111813_30	A12701	Solanum eutuberosum	Young leaf	Solanum eutuberosum (Young leaf)
111813_60	A12604	Solanum jasminoides	Leaf	Solanum jasminoides (Leaf)
111813_62	A12855	Solanum jasminoides	Opened flower	Solanum jasminoides (Opened flower)
111813_61	A12611	Solanum jasminoides	Petiole	Solanum jasminoides (Petiole)
111813_83	A12749	Solanum pseudocapsicum	Opened flower	Solanum pseudocapsicum (Opened flower)
111813_82	A12742	Solanum pseudocapsicum	Stem	Solanum pseudocapsicum (Stem)
111813_80	A12848	Solanum pseudocapsicum	Young leaf	Solanum pseudocapsicum (Young leaf)
111813_18	A12682	Solanum quitoense left plant	Unopened flower calyx	Solanum quitoense left plant (Unopened flower calyx)
111813_17	A12681	Solanum quitoense left plant	Young leaf	Solanum quitoense left plant (Young leaf)
111813_84	A12756	Solanum spirale	Leaf	Solanum spirale (Leaf)
111813_85	A12763	Solanum spirale	Stem	Solanum spirale (Stem)
111813_67	A12771	Solanum nigrum	Fruit	Solanum nigrum (Fruit)
111813_88	A12784	Physalis peruviana	Flower	Physalis peruviana (Flower)
111813_86	A12770	Physalis peruviana	Leaf	Physalis peruviana (Leaf)
111813_87	A12777	Physalis peruviana	Petiole	Physalis peruviana (Petiole)
111813_05	A12666	Iochroma fuchsioides	Petiole	Iochroma fuchsioides (Petiole)
111813_58	A12590	Saracha aff. punctata	Petiole	Saracha aff. punctata (Petiole)
111813_59	A12597	Saracha aff. punctata	Stem	Saracha aff. punctata (Stem)
111813_57	A12583	Saracha aff. punctata	Young leaf	Saracha aff. punctata (Young leaf)
111813_15	A12693	Capsicum annuum	Young leaf	Capsicum annuum (Young leaf)
111813_16	A12694	Capsicum annuum	Young leaf	Capsicum annuum (Young leaf)
111813_14	A12692	Capsicum chinense	Young leaf	Capsicum chinense (Young leaf)
111813_55	A12591	Lycianthes rantonnetii	Leaf	Lycianthes rantonnetii (Leaf)
111813_56	A12577	Lycianthes rantonnetii	Petiole	Lycianthes rantonnetii (Petiole)
111813_19	A12683	Brugmansia suaveolens L	Very young leaf	Brugmansia suaveolens L (Very young leaf)
111813_21	A12685	Brugmansia suaveolens R	Flower petal	Brugmansia suaveolens R (Flower petal)
111813_20	A12684	Brugmansia suaveolens R	Unopened flower bud	Brugmansia suaveolens R (Unopened flower bud)
111813_25	A12676	Mandragora autumnalis	Leaf lamina	Mandragora autumnalis (Leaf lamina)
111813_02	A12660	Juanulloa mexicana	Very young leaf	Juanulloa mexicana (Very young leaf)
111813_03	A12661	Juanulloa mexicana	Very young leaf	Juanulloa mexicana (Very young leaf)
111813_04	A12662	Juanulloa mexicana	Very young leaf	Juanulloa mexicana (Very young leaf)
111813_79	A12841	Nicotiana sylvestris	Leaf	Nicotiana sylvestris (Leaf)
111813_77	A12827	Calibrochoa sp.	Leaf	Calibrochoa sp. (Leaf)
111813_78	A12834	Calibrochoa sp.	Stem	Calibrochoa sp. (Stem)
111813_48	A12593	Cestrum diurnum	Fruit	Cestrum diurnum (Fruit)
111813_49	A12586	Cestrum diurnum	Opened flower	Cestrum diurnum (Opened flower)
111813_50	A12579	Cestrum diurnum	Petiole	Cestrum diurnum (Petiole)
111813_47	A12600	Cestrum diurnum	Young leaf	Cestrum diurnum (Young leaf)
111813_46	A12612	Goetzia sp.	Stem	Goetzia sp. (Stem)
111813_45	A12584	Goetzia sp.	Young leaf	Goetzia sp. (Young leaf)
111813_13	A12691	Ipomoea batatas margarita	Open leaf	Ipomoea batatas margarita (Open leaf)
111813_11	A12690	Ipomoea batatas margarita	Unopened young leaf	Ipomoea batatas margarita (Unopened young leaf)
		Acylsugar producers
111813_68	A12778	Solanum nigrum	Stem	Solanum nigrum (Stem)
111813_66	A12764	Solanum nigrum	Young leaf	Solanum nigrum (Young leaf)
111813_51	A12571	Physalis alkekengi	Old leaf	Physalis alkekengi (Old leaf)
111813_53	A12598	Physalis alkekengi	Orange calyx	Physalis alkekengi (Orange calyx)
111813_52	A12605	Physalis alkekengi	Petiole	Physalis alkekengi (Petiole)
111813_28	A12679	Physalis viscosa	Flower bud	Physalis viscosa (Flower bud)
111813_27	A12678	Physalis viscosa	Petiole	Physalis viscosa (Petiole)
111813_26	A12677	Physalis viscosa	Young leaf	Physalis viscosa (Young leaf)
111813_06	A12672	Iochroma cyaneum	New emerging leaf	Iochroma cyaneum (New emerging leaf)
111813_07	A12673	Iochroma cyaneum	Peduncle	Iochroma cyaneum (Peduncle)
111813_10	A12689	Iochroma cyaneum	Petiole	Iochroma cyaneum (Petiole)
111813_09	A12688	Iochroma cyaneum	Unopened flower	Iochroma cyaneum (Unopened flower)
111813_43	A12702	Atropa belladonna	Flower bud petals	Atropa belladonna (Flower bud petals)
111813_24	A12675	Atropa belladonna	Young leaf	Atropa belladonna (Young leaf)
111813_33	A12698	Hyoscyamus niger	Calyx	Hyoscyamus niger (Calyx)
111813_34	A12697	Hyoscyamus niger	Stem	Hyoscyamus niger (Stem)
111813_32	A12699	Hyoscyamus niger	Young leaf	Hyoscyamus niger (Young leaf)
111813_74	A12813	Nicotiana alata white	Flower bud	Nicotiana alata white (Flower bud)
111813_73	A12806	Nicotiana alata white	Leaf	Nicotiana alata white (Leaf)
111813_75	A12820	Nicotiana alata white	Stem	Nicotiana alata white (Stem)
111813_71	A12792	Nicotiana alata yellow	Flower bud	Nicotiana alata yellow (Flower bud)
111813_70	A12785	Nicotiana alata yellow	Leaf	Nicotiana alata yellow (Leaf)
111813_72	A12799	Nicotiana alata yellow	Stem	Nicotiana alata yellow (Stem)
111813_37	A12695	Nicotiana sp.	Petiole	Nicotiana sp. (Petiole)
111813_36	A12696	Nicotiana sp.	Young leaf	Nicotiana sp. (Young leaf)
111813_41	A12704	Salpiglossis sinuata	Fruit with calyx	Salpiglossis sinuata (Fruit with calyx)
111813_42	A12703	Salpiglossis sinuata	Old leaf	Salpiglossis sinuata (Old leaf)
111813_39	A12705	Salpiglossis sinuata	Petiole	Salpiglossis sinuata (Petiole)
111813_38	A12706	Salpiglossis sinuata	Young leaf	Salpiglossis sinuata (Young leaf)
