# Supplementary material for: Evolutionary routes to biochemical innovation revealed by integrative analysis of a plant-defense related specialized metabolic pathway
Source: eLife. 2017 Aug 30;6:e28468. doi: 10.7554/eLife.28468 (PMC5595436; doi:10.7554/eLife.28468)
Supplement: Supplementary file 1. — The enrichment columns show whether the GO is enriched in trichome high transcripts in this species, based on Fisher Exact Test 1: yes, 0: no. In the ‘# of genes’ column, 0 = GO category not enriched among trichome high genes in this species. [file elife-28468-supp1.xlsx]

## Sheet: MoreThan10reads
Supplementary File 1: GO enrichment among trichome high genes in different species
	Enrichment
								<————- READ COMMENTS IN THESE CELLS ———————>	# of genes in species with enrichment
#Pathway	SL	SQ	SN	HN	SS	# of species	Type	Function	SL	SQ	SN	HN	SS	Average
GO:0019825	1	1	1	1	1	5	molecular function	Oxygen binding	59	98	69	117	58	80.2
GO:0008559	1	1	1	1	1	5	molecular function	Xenobiotic-transporting ATPase activity	6	22	20	20	20	17.6
GO:0009922	1	1	1	1	1	5	molecular function	Fatty acid elongase activity	14	16	21	17	14	16.4
GO:0016165	0	1	1	1	1	4	molecular function	Linoleate 13S-lipoxygenase activity	0	17	17	17	17	17
GO:0009674	0	1	1	1	1	4	molecular function	Potassium:sodium symporter activity	0	15	15	15	15	15
GO:0004630	0	1	1	1	1	4	molecular function	Phospholipase D activity	0	13	14	13	13	13.25
GO:0042626	0	1	1	1	1	4	molecular function	ATPase activity, coupled to transmembrane movement of substances	0	21	11	17	11	15
GO:0030551	0	1	1	1	1	4	molecular function	Cyclic nucleotide binding	0	10	8	11	8	9.25
GO:0019199	0	1	1	1	1	4	molecular function	Transmembrane receptor protein kinase activity	0	45	59	55	59	54.5
GO:0004091	1	1	1	0	0	3	molecular function	Carboxylic ester hydrolase activity	30	39	26	0	0	31.6667
GO:0008152	1	0	1	1	0	3	biological process	Metabolic process	85	0	116	117	0	106
GO:0016308	0	1	1	1	0	3	molecular function	1-phosphatidylinositol-4-phosphate 5-kinase activity	0	10	6	10	0	8.66667
GO:0004012	0	1	1	1	0	3	molecular function	Phospholipid-translocating ATPase activity	0	12	12	12	0	12
GO:0004672	0	1	1	1	0	3	molecular function	Protein kinase activity	0	37	24	27	0	29.3333
GO:0043086	0	1	1	1	0	3	biological process	Negative regulation of catalytic activity	0	18	10	15	0	14.3333
GO:0080123	0	0	1	1	1	3	molecular function	Jasmonate-amino synthetase activity	0	0	12	12	12	12
GO:0010329	0	0	1	1	1	3	molecular function	Auxin efflux transmembrane transporter activity	0	0	14	11	11	12
GO:0004674	0	0	1	1	1	3	molecular function	Protein serine/threonine kinase activity	0	0	51	75	43	56.3333
GO:0070566	0	0	1	1	1	3	molecular function	Adenylyltransferase activity	0	0	12	12	12	12
GO:0005200	0	1	1	0	1	3	molecular function	Structural constituent of cytoskeleton	0	20	17	0	17	18
GO:0004805	0	1	1	0	1	3	molecular function	Trehalose-phosphatase activity	0	10	10	0	8	9.33333
GO:0030599	0	0	1	1	0	2	molecular function	Pectinesterase activity	0	0	17	22	0	19.5
GO:0005618	0	0	1	1	0	2	cellular component	Cell wall	0	0	12	20	0	16
GO:0004252	0	1	0	1	0	2	molecular function	Serine-type endopeptidase activity	0	53	0	48	0	50.5
GO:0006508	0	1	0	1	0	2	biological process	Proteolysis	0	136	0	51	0	93.5
GO:0004888	0	1	0	1	0	2	molecular function	Transmembrane signaling receptor activity	0	11	0	8	0	9.5
GO:0016829	0	1	0	1	0	2	molecular function	Lyase activity	0	15	0	14	0	14.5
GO:0018858	0	0	0	1	1	2	molecular function	Benzoate-CoA ligase activity	0	0	0	9	10	9.5
GO:0006278	0	0	0	1	1	2	biological process	RNA-dependent DNA replication	0	0	0	10	7	8.5
GO:0016301	0	0	1	1	0	2	molecular function	Kinase activity	0	0	38	27	0	32.5
GO:0004601	1	0	1	0	0	2	molecular function	Peroxidase activity	7	0	12	0	0	9.5
GO:0005351	1	1	0	0	0	2	molecular function	Sugar:proton symporter activity	7	14	0	0	0	10.5
GO:0015020	0	0	1	0	1	2	molecular function	Glucuronosyltransferase activity	0	0	9	0	10	9.5
GO:0004683	0	1	1	0	0	2	molecular function	Calmodulin-dependent protein kinase activity	0	28	16	0	0	22
GO:0019752	0	1	1	0	0	2	biological process	Carboxylic acid metabolic process	0	16	14	0	0	15
GO:0004322	0	1	0	0	1	2	molecular function	Ferroxidase activity	0	13	0	0	7	10
GO:0015250	1	0	0	0	0	1	molecular function	Water channel activity	10	0	0	0	0	10
GO:0004364	1	0	0	0	0	1	molecular function	Glutathione transferase activity	15	0	0	0	0	15
GO:0009607	1	0	0	0	0	1	biological process	Response to biotic stimulus	17	0	0	0	0	17
GO:0016563	1	0	0	0	0	1	molecular function	Transcription activator activity	17	0	0	0	0	17
GO:0005516	1	0	0	0	0	1	molecular function	Calmodulin binding	23	0	0	0	0	23
GO:0003700	1	0	0	0	0	1	molecular function	Sequence-specific DNA binding transcription factor activity	71	0	0	0	0	71
GO:0009055	1	0	0	0	0	1	molecular function	Electron carrier activity	14	0	0	0	0	14
GO:0006869	1	0	0	0	0	1	biological process	Lipid transport	10	0	0	0	0	10
GO:0005839	0	1	0	0	0	1	cellular component	Proteasome core complex	0	10	0	0	0	10
GO:0035091	0	1	0	0	0	1	molecular function	Phosphatidylinositol binding	0	18	0	0	0	18
GO:0051015	0	1	0	0	0	1	molecular function	Actin filament binding	0	23	0	0	0	23
GO:0006468	0	1	0	0	0	1	biological process	Protein phosphorylation	0	139	0	0	0	139
GO:0015431	0	1	0	0	0	1	molecular function	Glutathione S-conjugate-exporting ATPase activity	0	11	0	0	0	11
GO:0046961	0	1	0	0	0	1	molecular function	Proton-transporting ATPase activity, rotational mechanism	0	16	0	0	0	16
GO:0044237	0	1	0	0	0	1	biological process	Cellular metabolic process	0	18	0	0	0	18
GO:0030332	0	1	0	0	0	1	molecular function	Cyclin binding	0	10	0	0	0	10
GO:0030170	0	0	1	0	0	1	molecular function	Pyridoxal phosphate binding	0	0	25	0	0	25
GO:0005840	0	0	1	0	0	1	cellular component	Ribosome	0	0	40	0	0	40
GO:0015559	0	0	0	1	0	1	molecular function	Drug transmembrane transporter activity	0	0	0	17	0	17
GO:0006915	0	0	0	1	0	1	biological process	Apoptotic process	0	0	0	51	0	51
GO:0004675	0	0	0	1	0	1	molecular function	Transmembrane receptor protein serine/threonine kinase activity	0	0	0	60	0	60
GO:0055114	0	0	0	1	0	1	biological process	Oxidation-reduction process	0	0	0	85	0	85
GO:0016759	0	0	0	1	0	1	molecular function	Cellulose synthase activity	0	0	0	19	0	19
GO:0006952	0	0	0	1	0	1	biological process	Defense response	0	0	0	50	0	50
GO:0050660	0	0	0	1	0	1	molecular function	Flavin adenine dinucleotide binding	0	0	0	14	0	14
GO:0080017	0	0	0	0	1	1	molecular function	Alpha-humulene synthase activity	0	0	0	0	10	10
GO:0080016	0	0	0	0	1	1	molecular function	(-)-E-beta-caryophyllene synthase activity	0	0	0	0	10	10
GO:0016740	0	0	0	0	1	1	molecular function	Transferase activity	0	0	0	0	12	12
GO:0004004	0	0	0	0	1	1	molecular function	ATP-dependent RNA helicase activity	0	0	0	0	15	15
GO:0016887	0	0	0	0	1	1	molecular function	ATPase activity	0	0	0	0	17	17
GO:0005524	0	0	0	0	1	1	molecular function	ATP binding	0	0	0	0	51	51
GO:0042936	0	0	0	0	1	1	molecular function	Dipeptide transporter activity	0	0	0	0	21	21
GO:0080054	0	0	0	0	1	1	molecular function	Low affinity nitrate transmembrane transporter activity	0	0	0	0	12	12
