# Supplementary material for: Evolutionary routes to biochemical innovation revealed by integrative analysis of a plant-defense related specialized metabolic pathway
Source: eLife. 2017 Aug 30;6:e28468. doi: 10.7554/eLife.28468 (PMC5595436; doi:10.7554/eLife.28468)
Supplement: Supplementary file 3. [file elife-28468-supp3.xlsx]

## Sheet: Sheet1
Supplementary File 3: Primers used for DNA amplification
		Primer name	Notes	Primer sequence	Template
		Cloning Primers
	1	SS_ASAT1_startF	SsASAT2	ATAGCTAGCATGGCTGCTTCAAGGCTTG	c49208_g1 Isoform:i2
	2	SS_ASAT1_endR	SsASAT2	ATACTCGAGTCAAATCAGCTCGGAGAAGC	c49208_g1 Isoform:i2
	3	SS_ASAT2_startF	SsASAT3	ATAGCTAGCATGGGTGGTGTATCAAACCT	c36223_g2 Isoform:i1
	4	SS_ASAT2_endR	SsASAT3	ATACTCGAGGACTTAAGTGCTTGGAGAAGC	c36223_g2 Isoform:i1
	5	SSc36223_g2_startF	SsASAT3	agcatgactggtggacagcaaatgggtcggATGGGTGGTGTATCAAACCTTGTG	c36223
	6	SSc36223_g2_endR	SsASAT3	gccggatctcagtggtggtggtggtggtgcTTAAGTGCTTGGAGAAGCAAACTC	c36223
	7	SSc48744_g2_startF	SsASAT5	agcatgactggtggacagcaaatgggtcggATGGAACTAATCTCCCAAGAATTCATC	c48744
	8	SSc48744_g2_endR	SsASAT5	gccggatctcagtggtggtggtggtggtgcCTACACATGCGAATTGGGTTTCAG	c48744
	9	SSc58191_g3_startF		agcatgactggtggacagcaaatgggtcggATGGTTTTAATAACATCACAATTGCCA	c58191
	10	SSc58191_g3_endR		gccggatctcagtggtggtggtggtggtgcTCAAACATCAAAGAGACTTGGAACT	c58191
	11	SSc42979_g2_startF		agcatgactggtggacagcaaatgggtcggATGAACATGGAAAGAAAGATAGAGATAAC	c42979
	12	SSc42979_g2_endR		gccggatctcagtggtggtggtggtggtgcTCAAAGGACCTCGAATCCACCA	c42979
	13	SSc57127_g3_startF		agcatgactggtggacagcaaatgggtcggATGGCTGCCAAAGTGGAAATGATATC	c57127_g3
	14	SSc57127_g3_endR		gccggatctcagtggtggtggtggtggtgcTCAGAGCTCGTAAAGGACATCATG	c57127_g3
	15	SSc52698_g1_startF		agcatgactggtggacagcaaatgggtcggATGGTGTCTTCAAAACCCGAAG	SSc52698_g1
	16	SSc52698_g1_endR		gccggatctcagtggtggtggtggtggtgcTTAAATACAAGCAATAGACCATTCTTTGTTTA	SSc52698_g1
	17	SSc49704_g1_startF		agcatgactggtggacagcaaatgggtcggATGTCAAATTGCAATGGAAATGGAGTTTC	SSc49704_g1
	18	SSc49704_g1_endR		gccggatctcagtggtggtggtggtggtgcTTAATATCTAACAGTTACTATAACCTTCATTTC	SSc49704_g1
	19	SSc57127_g3_startF2		agcatgactggtggacagcaaatgggtcggATGGCTGCCAAAGTGGAAATG	SSc57127_g3
	20	SSc57127_g3_endR2		gccggatctcagtggtggtggtggtggtgcTCAGAGCTCGTAAAGGACATC	SSc57127_g3
	21	SSc57127_g2_startF2		agcatgactggtggacagcaaatgggtcggATGGCTGCCAAAGTGGAGATG	SSc57127_g2
	22	SSc57127_g2_endR2		gccggatctcagtggtggtggtggtggtgcTTATGTCAAAGCTTGGGAAAAGACA	SSc57127_g2
	23	SSc49383g1_i7_startF1		agcatgactggtggacagcaaatgggtcggATGATGAACATGAGTATGGTAATTTCAGTA	SSc49383g1_i7
	24	SSc49383g1_i7_endR1		gccggatctcagtggtggtggtggtggtgcTTATGGGGATGCCTTGGACAATTT	SSc49383g1_i7
	25	HN_c61400g1_i3_startF1	HnASAT2	agcatgactggtggacagcaaatgggtcggATGGCTGCTCCAAGACTTGTTTT	HN_c61400g1
	26	HN_c61400g1_i3_endR1	HnASAT2	gccggatctcagtggtggtggtggtggtgcCTAGAGTCCCGAGAATGGAGAAG	HN_c61400g1
	27	HN_c58659g1i1_F	HnASAT1	cgacgacaagaccctATGGCTGCCTCAGCTCTAC	HN_c58659g1i1
	28	HN_c58659g1i1_R	HnASAT1	gaggagaagagccctTCAAGCATGAAGTTTGAATTCAAGAACTTG	HN_c58659g1i1
		Sequencing Primers (in addition to gene specific primers above)
	1	T7 Promoter		TAATACGACTCACTATAGGG	T7 promoter
	2	T7 Terminator		GCTAGTTATTGCTCAGCGG	T7 Terminator
		VIGS Primers
	1	c40486_g1_p1F	SsASAT1	cgacgacaagaccctATAGCTCTAAGTGCATGTATATCGCA
	2	c40486_g1_p1R	SsASAT1	gaggagaagagccctAATTATTTTCCAATACCGCTTTCATACC	c40486_g1
	3	c40486_g1_p2F	SsASAT1	cgacgacaagaccctAGAGGTCATTAATAACTTCAAGAAATG	c40486_g1
	4	c40486_g1_p2R	SsASAT1	gaggagaagagccctGCTCCATCTCTCTCTCAAACG	c40486_g1
	5	c49208_g1_p1F	SsASAT2	cgacgacaagaccctCGAATGTAATGACATGGGAG	c49208_g1
	6	c49208_g1_p1R	SsASAT2	gaggagaagagccctTTGGTTGGTTTAAGTATCGAC	c49208_g1
	7	c49208_g1_p2F	SsASAT2	cgacgacaagaccctAACAACATCGAAAAGGTACCA	c49208_g1
	8	c49208_g1_p2R	SsASAT2	gaggagaagagccctACGAGTCTTTGCAAATTCAGC	c49208_g1
	9	c36223_g2_p1F	SsASAT3	cgacgacaagaccctTCTGTTGATTGTAATGACAGTGGAG	c36223_g2
	10	c36223_g2_p1R	SsASAT3	gaggagaagagccctGACCGGGTAATATTTTTGAACTTGG	c36223_g2
	11	c36223_g2_p2F	SsASAT3	cgacgacaagaccctAACTTAGTCATTTTGATTGCGGAGG	c36223_g2
	12	c36223_g2_p2R	SsASAT3	gaggagaagagccctGCTGACACAATCTCAGTGTCAG	c36223_g2
	13	SS_c48744g2_p1F	SsASAT5	cgacgacaagaccctTCAAATTCTATGAGTATTCCATTTTGG	c48744_g2
	14	SS_c48744g2_p1R	SsASAT5	gaggagaagagccctACTCTTTTTCCATCGAGAATGT	c48744_g2
	15	SS_c48744g2_p2F	SsASAT5	cgacgacaagaccctGACAAGTACTATCTGGATGTGC	c48744_g2
	16	SS_c48744g2_p2R	SsASAT5	gaggagaagagccctTGCATCCTTTCTGCTAACCAA	c48744_g2
		qRT-PCR Primers
	1	Ss_c55490_qpcr_g2_F3	SsPDS	GTGGAAGCTCAAGACGGGTT	c55490_g2
	2	Ss_c55490_qpcr_g2_R3	SsPDS	AGCGATCAAGATGCACTGCA	c55490_g2
	3	c40590_g2_F1	SsEF1a	CTGAGCGTGAACGTGGTATTA	c58871_g2_i1
	4	c40590_g2_R1	SsEF1a	GTGGAGTCAATGATGAGGACAG	c58871_g2_i1
	5	c40486_g1-qPCR_F4	SsASAT1	TCTATCCCAAGAACAAGGGAAAT	c40486_g1
	6	c40486_g1-qPCR_R4	SsASAT1	CGAAACGAGCCTTGAAGAAATC	c40486_g1
	7	Ss_c49208_qpcr_g1_F1	SsASAT2	GGGAACTCACTCCTACGTTCC	c49208_g1
	8	Ss_c49208_qpcr_g1_R1	SsASAT2	TCTCTTACGCGCCCTGCTAA	c49208_g1
	9	c36223_g2-qPCR_F5	SsASAT3	TGAGAGGGTTAGTCTACCAAGT	c36223_g2
	10	c36223_g2-qPCR_R5	SsASAT3	CAAACTCTAGGAGCTCTTCATCC	c36223_g2
	11	c48744_g2-qPCR_F7	SsASAT5	CTAGCACAGCTGAAGGGAAATC	c48744_g2
	12	c48744_g2-qPCR_R7	SsASAT5	TGCGAATTGGGTTTCAGAGTAG	c48744_g2
